# Supplementary material for: Global Search for Stable C4H5NO Compounds—Guinness Molecules and Stability Islands
Source: MDPI journal article supplement (doi:10.3390/molecules28020728), 2023-01-11
Supplement: s1 [file s1]

**Table S1. Molecules C<sub>4</sub>H<sub>5</sub>NO containing 5-membered heterocycles and their thermodynamic parameters**

| Structure                                                                                      | E(zpve), a.u. | $\Delta E(\text{zpve})$ , kcal/mol | H, a.u.     | $\Delta H(\text{kcal/mol})$ | G(298), a.u. | $\Delta G(\text{kcal/mol})$ |
|------------------------------------------------------------------------------------------------|---------------|------------------------------------|-------------|-----------------------------|--------------|-----------------------------|
| 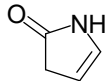 <b>000</b>   | -285.229335   | 0                                  | -285.223367 | 0                           | -285.257581  | 0                           |
|  <b>001</b>   | -285.229061   | 0.17                               | -285.223032 | 0.21                        | -285.257548  | 0.02                        |
|  <b>002</b>   | -285.220611   | 5.47                               | -285.214513 | 5.56                        | -285.249214  | 5.25                        |
|  <b>003</b>   | -285.218815   | 6.60                               | -285.212765 | 6.65                        | -285.247266  | 6.47                        |
|  <b>004</b>   | -285.217305   | 7.55                               | -285.211248 | 7.60                        | -285.245791  | 7.40                        |
|  <b>005</b>   | -285.213312   | 10.05                              | -285.208309 | 9.45                        | -285.241513  | 10.08                       |
|  <b>006</b>  | -285.212644   | 10.47                              | -285.206465 | 10.61                       | -285.240877  | 10.48                       |
|  <b>007</b> | -285.209030   | 12.74                              | -285.203052 | 12.75                       | -285.237651  | 12.51                       |
|  <b>008</b> | -285.208787   | 12.89                              | -285.202817 | 12.90                       | -285.237320  | 12.71                       |
|  <b>009</b> | -285.209240   | 12.61                              | -285.203516 | 12.46                       | -285.237152  | 12.82                       |

|                                                                                                |             |       |             |       |             |       |
|------------------------------------------------------------------------------------------------|-------------|-------|-------------|-------|-------------|-------|
| 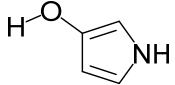 <b>010</b>   | -285.208165 | 13.28 | -285.201927 | 13.45 | -285.236503 | 13.23 |
|  <b>011</b>   | -285.207693 | 13.58 | -285.201520 | 13.71 | -285.235890 | 13.61 |
|  <b>012</b>   | -285.206885 | 14.09 | -285.201149 | 13.94 | -285.234783 | 14.31 |
|  <b>013</b>   | -285.200612 | 18.02 | -285.194710 | 17.98 | -285.228657 | 18.15 |
|  <b>014</b>   | -285.200473 | 18.11 | -285.194736 | 17.97 | -285.228525 | 18.23 |
|  <b>015</b>   | -285.198230 | 19.52 | -285.192314 | 19.49 | -285.226266 | 19.65 |
|  <b>016</b>  | -285.195834 | 21.02 | -285.190090 | 20.88 | -285.223902 | 21.13 |
|  <b>017</b> | -285.195373 | 21.31 | -285.189527 | 21.23 | -285.223389 | 21.46 |
|  <b>018</b> | -285.193806 | 22.29 | -285.187914 | 22.25 | -285.221826 | 22.44 |
|  <b>019</b> | -285.193250 | 22.64 | -285.187290 | 22.64 | -285.221368 | 22.72 |

|                                                                                                |             |       |             |       |             |       |
|------------------------------------------------------------------------------------------------|-------------|-------|-------------|-------|-------------|-------|
| 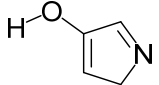 <b>020</b>   | -285.192141 | 23.34 | -285.186252 | 23.29 | -285.220187 | 23.47 |
|  <b>021</b>   | -285.190268 | 24.51 | -285.184214 | 24.57 | -285.218487 | 24.53 |
|  <b>022</b>   | -285.188657 | 25.53 | -285.182835 | 25.43 | -285.216878 | 25.54 |
|  <b>023</b>   | -285.188653 | 25.53 | -285.182706 | 25.52 | -285.216720 | 25.64 |
|  <b>024</b>   | -285.186932 | 26.61 | -285.181113 | 26.51 | -285.215140 | 26.63 |
|  <b>025</b>   | -285.181691 | 29.90 | -285.180747 | 26.74 | -285.214770 | 26.86 |
|  <b>026</b>  | -285.185720 | 27.37 | -285.179546 | 27.50 | -285.214053 | 27.31 |
|  <b>027</b> | -285.183883 | 28.52 | -285.178466 | 28.18 | -285.211669 | 28.81 |
|  <b>028</b> | -285.182308 | 29.51 | -285.176323 | 29.52 | -285.210557 | 29.51 |
|  <b>029</b> | -285.180719 | 30.51 | -285.175338 | 30.14 | -285.208469 | 30.82 |

|                                                                                              |             |       |             |       |             |       |
|----------------------------------------------------------------------------------------------|-------------|-------|-------------|-------|-------------|-------|
| 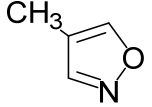 <b>030</b> | -285.178201 | 32.09 | -285.172060 | 32.20 | -285.206918 | 31.79 |
|  <b>031</b> | -285.173373 | 35.12 | -285.167368 | 35.14 | -285.201652 | 35.10 |
|  <b>032</b> | -285.142275 | 54.63 | -285.136263 | 54.66 | -285.170717 | 54.51 |

**Table S2. Molecules C<sub>4</sub>H<sub>5</sub>NO containing 6-membered heterocycles and their thermodynamic parameters**

| Structure                                                                                      | E(zpve). a.u. | $\Delta E(\text{zpve})$ , kcal/mol | H, a.u.     | $\Delta H(\text{kcal/mol})$ | G(298). a.u. | $\Delta G(\text{kcal/mol})$ |
|------------------------------------------------------------------------------------------------|---------------|------------------------------------|-------------|-----------------------------|--------------|-----------------------------|
|  <b>100</b>   | -285.186593   | 26.82                              | -285.180805 | 26.71                       | -285.215020  | 26.71                       |
|  <b>101</b>   | -285.185214   | 27.69                              | -285.179395 | 27.59                       | -285.213585  | 27.61                       |
|  <b>102</b>   | -285.181749   | 29.86                              | -285.176103 | 29.66                       | -285.209692  | 30.05                       |
|  <b>103</b> | -285.173018   | 35.34                              | -285.167415 | 35.11                       | -285.200858  | 35.59                       |
|  <b>104</b> | -285.161914   | 42.31                              | -285.156031 | 42.25                       | -285.190256  | 42.25                       |
|  <b>105</b> | -285.137756   | 57.47                              | -285.131843 | 57.43                       | -285.166604  | 57.09                       |

|                                                                                              |             |       |             |       |             |       |
|----------------------------------------------------------------------------------------------|-------------|-------|-------------|-------|-------------|-------|
| 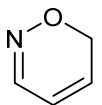 <b>106</b> | -285.128733 | 63.13 | -285.123531 | 62.65 | -285.156322 | 63.54 |
|  <b>107</b> | -285.115525 | 71.42 | -285.109668 | 71.35 | -285.143535 | 71.57 |

**Table S3. Molecules C<sub>4</sub>H<sub>5</sub>NO containing 4-membered heterocycles and their thermodynamic parameters**

| Structure                                                                                                    | E(zpve). a.u. | $\Delta E(\text{zpve})$ , kcal/mol | H, a.u.     | $\Delta H(\text{kcal/mol})$ | G(298). a.u. | $\Delta G(\text{kcal/mol})$ |
|--------------------------------------------------------------------------------------------------------------|---------------|------------------------------------|-------------|-----------------------------|--------------|-----------------------------|
| 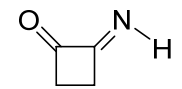 <b>200</b>                 | -285.182089   | 29.65                              | -285.175665 | 29.93                       | -285.211225  | 29.09                       |
|  <b>201</b>                 | -285.181981   | 29.72                              | -285.175566 | 30.00                       | -285.211083  | 29.18                       |
|  <b>202<sup>a</sup></b>     | -285.177060   | 32.80                              | -285.170390 | 33.24                       | -285.206128  | 32.29                       |
|  <b>203<sup>a</sup></b>    | -285.172826   | 35.46                              | -285.166249 | 35.84                       | -285.201867  | 34.96                       |
|  <b>204<sup>a,b</sup></b> | -285.164083   | 40.95                              | -285.157723 | 41.19                       | -285.192740  | 40.69                       |
|  <b>205<sup>a</sup></b>   | -285.158320   | 44.56                              | -285.151832 | 44.89                       | -285.187334  | 44.08                       |
|  <b>206<sup>a</sup></b>   | -285.090918   | 86.86                              | -285.089974 | 83.71                       | -285.124975  | 83.21                       |

<sup>a</sup>Positional isomer neglected; <sup>b</sup>rotamer neglected.

**Table S4. Molecules C<sub>4</sub>H<sub>5</sub>NO containing saturated 3-membered cycles and their thermodynamic parameters.**

| Structure                                                                                                | E(zpve). a.u. | ΔE(zpve), kcal/mol | H, a.u.     | ΔH(kcal/mol) | G(298). a.u. | ΔG(kcal/mol) |
|----------------------------------------------------------------------------------------------------------|---------------|--------------------|-------------|--------------|--------------|--------------|
|  <b>300</b>             | -285.199137   | 18.95              | -285.192356 | 19.46        | -285.229628  | 17.54        |
|  <b>301<sup>a</sup></b> | -285.173826   | 34.83              | -285.167011 | 35.36        | -285.203084  | 34.20        |
|  <b>302</b>             | -285.170962   | 36.63              | -285.164610 | 36.87        | -285.199725  | 36.31        |
|  <b>303<sup>b</sup></b> | -285.157401   | 45.14              | -285.150456 | 45.75        | -285.187228  | 44.15        |
|  <b>304</b>             | -285.149779   | 49.92              | -285.143849 | 49.90        | -285.178174  | 49.83        |
|  <b>305</b>           | -285.146515   | 51.97              | -285.139109 | 52.87        | -285.176552  | 50.85        |
|  <b>306</b>           | -285.145812   | 52.41              | -285.138411 | 53.31        | -285.175883  | 51.27        |

|                                                                                                          |             |       |             |       |             |       |
|----------------------------------------------------------------------------------------------------------|-------------|-------|-------------|-------|-------------|-------|
| 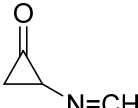 <b>307<sup>b</sup></b> | -285.135249 | 59.04 | -285.128359 | 59.62 | -285.164931 | 58.14 |
|  <b>308</b>             | -285.132579 | 60.72 | -285.125136 | 61.64 | -285.162826 | 59.46 |
|  <b>309</b>             | -285.131205 | 61.58 | -285.123797 | 62.48 | -285.161392 | 60.36 |
|  <b>310</b>             | -285.079089 | 94.28 | -285.072104 | 94.92 | -285.108475 | 93.57 |

<sup>a</sup>Positional isomer neglected; <sup>b</sup>rotamer neglected.

**Table S5. Molecules C<sub>4</sub>H<sub>5</sub>NO containing unsaturated 3-membered cycles and their thermodynamic parameters**

| Structure                                                                                      | E(zpve). a.u. | ΔE(zpve), kcal/mol | H, a.u.     | ΔH(kcal/mol) | G(298). a.u. | ΔG(kcal/mol) |
|------------------------------------------------------------------------------------------------|---------------|--------------------|-------------|--------------|--------------|--------------|
| 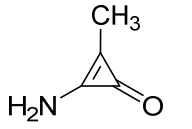 <b>400</b> | -285.167990   | 38.49              | -285.159793 | 39.89        | -285.202046  | 34.85        |
|  <b>401</b> | -285.157527   | 45.06              | -285.150189 | 45.92        | -285.187639  | 43.89        |

|                                                                                                            |             |       |             |       |             |       |
|------------------------------------------------------------------------------------------------------------|-------------|-------|-------------|-------|-------------|-------|
| 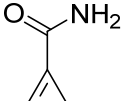 <b>402<sup>b</sup></b>   | -285.154099 | 47.21 | -285.146418 | 48.29 | -285.185658 | 45.13 |
|  <b>403<sup>a</sup></b>   | -285.136616 | 58.18 | -285.129322 | 59.01 | -285.166376 | 57.23 |
|  <b>404</b>               | -285.135031 | 59.18 | -285.128290 | 59.66 | -285.164466 | 58.43 |
|  <b>405</b>               | -285.134187 | 59.71 | -285.127284 | 60.29 | -285.163876 | 58.80 |
|  <b>406</b>               | -285.132766 | 60.60 | -285.125837 | 61.20 | -285.162779 | 59.49 |
|  <b>407</b>               | -285.129321 | 62.76 | -285.122511 | 63.29 | -285.158725 | 62.03 |
|  <b>408</b>              | -285.127080 | 64.17 | -285.120095 | 64.80 | -285.156831 | 63.22 |
|  <b>409</b>             | -285.126148 | 64.75 | -285.119158 | 65.39 | -285.156083 | 63.69 |
|  <b>410<sup>a</sup></b> | -285.122136 | 67.27 | -285.114737 | 68.17 | -285.152455 | 65.97 |



|                                                                                                            |             |       |             |        |             |       |
|------------------------------------------------------------------------------------------------------------|-------------|-------|-------------|--------|-------------|-------|
| 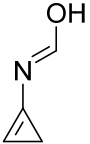 <b>411</b>               | -285.118767 | 69.38 | -285.111768 | 70.03  | -285.148270 | 68.59 |
|  <b>412</b>               | -285.116870 | 70.57 | -285.109797 | 71.27  | -285.147091 | 69.33 |
|  <b>413</b>               | -285.115440 | 71.47 | -285.108310 | 72.20  | -285.145278 | 70.47 |
|  <b>414</b>               | -285.112647 | 73.22 | -285.105165 | 74.17  | -285.142344 | 72.31 |
|  <b>415</b>               | -285.109901 | 74.95 | -285.102549 | 75.81  | -285.140685 | 73.35 |
|  <b>416<sup>b</sup></b> | -285.108441 | 75.86 | -285.101229 | 76.64  | -285.138455 | 74.75 |
|  <b>417</b>             | -285.108110 | 76.07 | -285.101596 | 76.41  | -285.137277 | 75.49 |
|  <b>418</b>             | -285.070976 | 99.37 | -285.064005 | 100.00 | -285.100643 | 98.48 |

|                                                                                              |             |        |             |        |             |        |
|----------------------------------------------------------------------------------------------|-------------|--------|-------------|--------|-------------|--------|
| 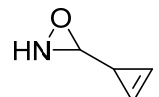 <b>419</b> | -285.043661 | 116.51 | -285.037177 | 116.84 | -285.072792 | 115.96 |
|  <b>420</b> | -285.036752 | 120.85 | -285.030302 | 121.15 | -285.065684 | 120.42 |

<sup>a</sup>Positional isomer neglected; <sup>b</sup>rotamer neglected.

**Table S6. Bicyclic compounds C<sub>4</sub>H<sub>5</sub>NO and their thermodynamic parameters**

| Structure                                                                                                   | E(zpve). a.u. | ΔE(zpve), kcal/mol | H, a.u.     | ΔH(kcal/mol) | G(298). a.u. | ΔG(kcal/mol) |
|-------------------------------------------------------------------------------------------------------------|---------------|--------------------|-------------|--------------|--------------|--------------|
| 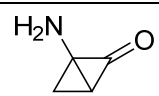 <b>500</b> <sup>a</sup>   | -285.149514   | 50.09              | -285.142922 | 50.48        | -285.178297  | 49.75        |
|  <b>501</b>                | -285.138734   | 56.85              | -285.132420 | 57.07        | -285.167353  | 56.62        |
|  <b>502</b> <sup>a</sup>   | -285.114446   | 72.09              | -285.108009 | 72.39        | -285.143278  | 71.73        |
|  <b>503</b> <sup>a</sup>  | -285.096723   | 83.22              | -285.090108 | 83.62        | -285.125507  | 82.88        |
|  <b>504</b> <sup>a</sup> | -285.078719   | 94.51              | -285.072219 | 94.85        | -285.107410  | 94.23        |
|  <b>505</b>              | -285.053056   | 110.62             | -285.046161 | 111.20       | -285.082466  | 109.89       |

|                                                                                              |             |        |             |        |             |        |
|----------------------------------------------------------------------------------------------|-------------|--------|-------------|--------|-------------|--------|
| 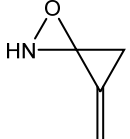 <b>506</b> | -285.053587 | 110.28 | -285.047092 | 110.61 | -285.082369 | 109.95 |
|----------------------------------------------------------------------------------------------|-------------|--------|-------------|--------|-------------|--------|

<sup>a</sup>Positional isomer neglected.

**Table S7. Acyclic nitriles C<sub>4</sub>H<sub>5</sub>NO and their thermodynamic parameters**

| Structure                                                                                      | E(zpve). a.u. | ΔE(zpve), kcal/mol | H, a.u.     | ΔH(kcal/mol) | G(298). a.u. | ΔG(kcal/mol) |
|------------------------------------------------------------------------------------------------|---------------|--------------------|-------------|--------------|--------------|--------------|
| 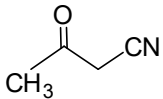 <b>600</b>   | -285.215399   | 8.74               | -285.208703 | 9.20         | -285.244724  | 8.07         |
|  <b>601</b>   | -285.207256   | 13.85              | -285.199916 | 14.72        | -285.237819  | 12.40        |
|  <b>602</b>   | -285.202790   | 16.66              | -285.195400 | 17.55        | -285.232649  | 15.65        |
|  <b>603</b>   | -285.200916   | 17.83              | -285.193452 | 18.77        | -285.231316  | 16.48        |
|  <b>604</b> | -285.196166   | 20.81              | -285.188543 | 21.85        | -285.226483  | 19.51        |
|  <b>605</b> | -285.193626   | 22.41              | -285.186073 | 23.40        | -285.223717  | 21.25        |
|  <b>606</b> | -285.190455   | 24.40              | -285.183266 | 25.16        | -285.220556  | 23.23        |

|                                                                                                |             |       |             |       |             |       |
|------------------------------------------------------------------------------------------------|-------------|-------|-------------|-------|-------------|-------|
| 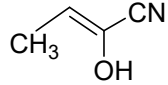 <b>607</b>   | -285.189308 | 25.12 | -285.181550 | 26.24 | -285.220307 | 23.39 |
|  <b>608</b>   | -285.189493 | 25.00 | -285.181983 | 25.97 | -285.219521 | 23.88 |
|  <b>609</b>   | -285.186123 | 27.12 | -285.179431 | 27.57 | -285.215378 | 26.48 |
|  <b>610</b>   | -285.184869 | 27.90 | -285.177337 | 28.88 | -285.215382 | 26.48 |
|  <b>611</b>   | -285.179658 | 31.17 | -285.172261 | 32.07 | -285.210008 | 29.85 |
|  <b>612</b>   | -285.179824 | 31.07 | -285.173129 | 31.52 | -285.209299 | 30.30 |
|  <b>613</b>   | -285.179809 | 31.08 | -285.173124 | 31.53 | -285.209275 | 30.31 |
|  <b>614</b>   | -285.179809 | 31.08 | -285.171031 | 32.84 | -285.207475 | 31.44 |
|  <b>615</b> | -285.172284 | 35.80 | -285.164814 | 36.74 | -285.202590 | 34.51 |
|  <b>616</b> | -285.161402 | 42.63 | -285.154494 | 43.22 | -285.191744 | 41.31 |

**Table S8. Conjugated trienes C<sub>4</sub>H<sub>5</sub>NO and their thermodynamic parameters**

| Structure                                                                                                  | E(zpve). a.u. | ΔE(zpve), kcal/mol | H, a.u.     | ΔH(kcal/mol) | G(298). a.u. | ΔG(kcal/mol) |
|------------------------------------------------------------------------------------------------------------|---------------|--------------------|-------------|--------------|--------------|--------------|
| 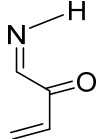 <b>700<sup>b</sup></b> | -285.177734   | 32.38              | -285.171310 | 32.67        | -285.206924  | 31.79        |

|                                                                                                          |             |       |             |       |             |       |
|----------------------------------------------------------------------------------------------------------|-------------|-------|-------------|-------|-------------|-------|
| 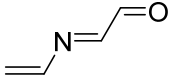 <b>701<sup>b</sup></b> | -285.171676 | 36.18 | -285.164393 | 37.01 | -285.201694 | 35.07 |
|  <b>702<sup>b</sup></b> | -285.171283 | 36.43 | -285.164836 | 36.73 | -285.200461 | 35.84 |
|  <b>703<sup>b</sup></b> | -285.168799 | 37.99 | -285.162215 | 38.37 | -285.198755 | 36.91 |
|  <b>704<sup>b</sup></b> | -285.162554 | 41.91 | -285.155721 | 42.45 | -285.192477 | 40.85 |

<sup>b</sup>Rotamer neglected.

**Table S9. Acetylenes C<sub>4</sub>H<sub>5</sub>NO and their thermodynamic parameters**

| Structure                                                                                                  | E(zpve). a.u. | ΔE(zpve), kcal/mol | H, a.u.     | ΔH(kcal/mol) | G(298). a.u. | ΔG(kcal/mol) |
|------------------------------------------------------------------------------------------------------------|---------------|--------------------|-------------|--------------|--------------|--------------|
| 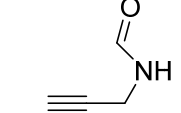 <b>800</b>              | -285.158760   | 44.29              | -285.151329 | 45.20        | -285.189458  | 42.75        |
|  <b>801</b>             | -285.144009   | 53.54              | -285.136338 | 54.61        | -285.174522  | 52.12        |
|  <b>802<sup>b</sup></b> | -285.101478   | 80.23              | -285.093917 | 81.23        | -285.132200  | 78.68        |

<sup>b</sup>Rotamer neglected.

Table S10. Allenes C<sub>4</sub>H<sub>5</sub>NO. ketenes and their thermodynamic parameters

| Structure                                                                                                  | E(zpve). a.u. | $\Delta E(\text{zpve})$ , kcal/mol | H, a.u.     | $\Delta H(\text{kcal/mol})$ | G(298). a.u. | $\Delta G(\text{kcal/mol})$ |
|------------------------------------------------------------------------------------------------------------|---------------|------------------------------------|-------------|-----------------------------|--------------|-----------------------------|
| 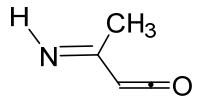 <b>900<sup>b</sup></b>   | -285.191324   | 23.85                              | -285.183876 | 24.78                       | -285.222050  | 22.30                       |
|  <b>901<sup>b</sup></b>   | -285.182745   | 29.24                              | -285.175883 | 29.80                       | -285.212549  | 28.26                       |
|  <b>902<sup>b</sup></b>   | -285.174717   | 34.27                              | -285.167318 | 35.17                       | -285.205666  | 32.58                       |
|  <b>903<sup>b</sup></b>   | -285.175228   | 33.95                              | -285.168409 | 34.49                       | -285.204908  | 33.05                       |
|  <b>904<sup>b</sup></b>   | -285.170278   | 37.06                              | -285.162663 | 38.09                       | -285.201201  | 35.38                       |
|  <b>905<sup>b</sup></b>   | -285.167770   | 38.63                              | -285.160601 | 39.39                       | -285.198776  | 36.90                       |
|  <b>906<sup>b</sup></b>  | -285.164811   | 40.49                              | -285.157007 | 41.64                       | -285.195997  | 38.64                       |
|  <b>907<sup>b</sup></b> | -285.142065   | 54.76                              | -285.134612 | 55.69                       | -285.172017  | 53.69                       |
|  <b>908<sup>b</sup></b> | -285.136723   | 58.11                              | -285.129354 | 58.99                       | -285.166697  | 57.03                       |

|  |             |       |             |       |             |       |
|--|-------------|-------|-------------|-------|-------------|-------|
|  | -285.128969 | 62.98 | -285.121207 | 64.11 | -285.159660 | 61.45 |
|--|-------------|-------|-------------|-------|-------------|-------|

<sup>b</sup>Rotamer neglected.

**Table S11. Acyclic isonitriles C<sub>4</sub>H<sub>5</sub>NO and their thermodynamic parameters**

| Structure | E(zpve). a.u. | ΔE(zpve), kcal/mol | H, a.u.     | ΔH(kcal/mol) | G(298). a.u. | ΔG(kcal/mol) |
|-----------|---------------|--------------------|-------------|--------------|--------------|--------------|
|           | -285.177682   | 32.41              | -285.170656 | 33.08        | -285.207548  | 31.40        |
|           | -285.164412   | 40.74              | -285.156678 | 41.85        | -285.194667  | 39.48        |
|           | -285.161051   | 42.85              | -285.153108 | 44.09        | -285.191707  | 41.34        |
|           | -285.154690   | 46.84              | -285.147310 | 47.73        | -285.184717  | 45.72        |
|           | -285.150526   | 49.45              | -285.142845 | 50.53        | -285.181105  | 47.99        |
|           | -285.103766   | 78.80              | -285.144141 | 49.72        | -285.180427  | 48.41        |
|           | -285.149063   | 50.37              | -285.141604 | 51.31        | -285.179255  | 49.15        |
|           | -285.145973   | 52.31              | -285.138446 | 53.29        | -285.176215  | 51.06        |
|           |               |                    |             |              |              |              |

|                                                                                               |             |       |             |       |             |       |
|-----------------------------------------------------------------------------------------------|-------------|-------|-------------|-------|-------------|-------|
| 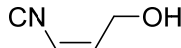 <b>1008</b> | -285.146626 | 51.90 | -285.139782 | 52.45 | -285.176204 | 51.06 |
|  <b>1009</b> | -285.143396 | 53.93 | -285.136367 | 54.59 | -285.173026 | 53.06 |

**Table S12. Carbenes C<sub>4</sub>H<sub>5</sub>NO and their thermodynamic parameters**

| Structure                                                                                                     | E(zpve). a.u. | $\Delta E(\text{zpve})$ , kcal/mol | H, a.u.     | $\Delta H(\text{kcal/mol})$ | G(298). a.u. | $\Delta G(\text{kcal/mol})$ |
|---------------------------------------------------------------------------------------------------------------|---------------|------------------------------------|-------------|-----------------------------|--------------|-----------------------------|
| 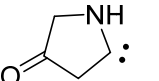 <b>1100<sup>a</sup></b>     | -285.153903   | 47.33                              | -285.147722 | 47.47                       | -285.182830  | 46.91                       |
|  <b>1101<sup>a,b</sup></b>   | -285.143530   | 53.84                              | -285.135770 | 54.97                       | -285.174218  | 52.31                       |
|  <b>1102</b>                 | -285.142635   | 54.41                              | -285.136711 | 54.38                       | -285.170686  | 54.53                       |
|  <b>1103</b>                 | -285.139204   | 56.56                              | -285.133209 | 56.58                       | -285.167312  | 56.64                       |
|  <b>1104</b>                | -285.135128   | 59.12                              | -285.127340 | 60.26                       | -285.166156  | 57.37                       |
|  <b>1105<sup>a</sup></b>   | -285.137037   | 57.92                              | -285.130872 | 58.04                       | -285.165280  | 57.92                       |
|  <b>1106<sup>a,b</sup></b> | -285.105616   | 77.63                              | -285.098696 | 78.23                       | -285.135632  | 76.52                       |

<sup>a</sup>Positional isomer neglected; <sup>b</sup>rotamer neglected.



**Table S13. Bipolar compounds C<sub>4</sub>H<sub>5</sub>NO and their thermodynamic parameters**

| Structure                                                                                                       | E(zpve). a.u. | $\Delta E$ (zpve), kcal/mol | H, a.u.     | $\Delta H$ (kcal/mol) | G(298). a.u. | $\Delta G$ (kcal/mol) |
|-----------------------------------------------------------------------------------------------------------------|---------------|-----------------------------|-------------|-----------------------|--------------|-----------------------|
| 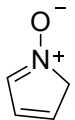<br><b>1200</b> <sup>a,b</sup> | -285.135776   | 58.71                       | -285.130117 | 58.52                 | -285.163639  | 58.95                 |
| <br><b>1201</b> <sup>a,b</sup> | -285.131281   | 61.53                       | -285.125617 | 61.34                 | -285.159143  | 61.77                 |

<sup>a</sup>Positional isomer neglected; <sup>b</sup>rotamer neglected.

**Table S14. Intermolecular associates C<sub>4</sub>H<sub>5</sub>NO and their thermodynamic parameters**

| Structure                                                                                                      | E(zpve). a.u. | $\Delta E$ (zpve), kcal/mol | H, a.u.     | $\Delta H$ (kcal/mol) | G(298). a.u. | $\Delta G$ (kcal/mol) |
|----------------------------------------------------------------------------------------------------------------|---------------|-----------------------------|-------------|-----------------------|--------------|-----------------------|
| 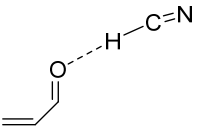<br><b>1300</b> <sup>b</sup>  | -285.167303   | 38.93                       | -285.158443 | 40.74                 | -285.200968  | 35.53                 |
| <br><b>1301</b> <sup>b</sup> | -285.164966   | 40.39                       | -285.155864 | 42.36                 | -285.200403  | 35.88                 |

<sup>b</sup>Rotamer neglected.

**000**

Standard orientation:

| Center<br>Number | Atomic<br>Number | Atomic<br>Type | Coordinates (Angstroms) |           |           |
|------------------|------------------|----------------|-------------------------|-----------|-----------|
|                  |                  |                | X                       | Y         | Z         |
| 1                | 6                | 0              | 1.333766                | -0.745002 | -0.000015 |
| 2                | 6                | 0              | 1.482851                | 0.582328  | -0.000180 |
| 3                | 6                | 0              | 0.117755                | 1.212895  | 0.000110  |
| 4                | 1                | 0              | 2.089388                | -1.518311 | -0.000113 |
| 5                | 1                | 0              | 2.421929                | 1.114992  | 0.000177  |
| 6                | 1                | 0              | -0.082120               | 1.833387  | -0.880104 |
| 7                | 1                | 0              | -0.081698               | 1.833554  | 0.880273  |
| 8                | 7                | 0              | -0.022118               | -1.101158 | 0.000052  |
| 9                | 1                | 0              | -0.388399               | -2.038084 | 0.000325  |
| 10               | 6                | 0              | -0.837058               | 0.014504  | 0.000052  |
| 11               | 8                | 0              | -2.048520               | 0.011777  | -0.000091 |

**001**

Standard orientation:

| Center<br>Number | Atomic<br>Number | Atomic<br>Type | Coordinates (Angstroms) |           |           |
|------------------|------------------|----------------|-------------------------|-----------|-----------|
|                  |                  |                | X                       | Y         | Z         |
| 1                | 6                | 0              | -0.858335               | 0.022595  | -0.000039 |
| 2                | 6                | 0              | 0.048654                | 1.211645  | 0.000027  |
| 3                | 6                | 0              | 1.316366                | 0.802890  | 0.000141  |
| 4                | 6                | 0              | 1.382013                | -0.701431 | -0.000037 |
| 5                | 1                | 0              | -0.327802               | 2.224930  | -0.000616 |
| 6                | 1                | 0              | 2.205963                | 1.420024  | -0.000171 |

|    |   |   |           |           |           |
|----|---|---|-----------|-----------|-----------|
| 7  | 1 | 0 | 1.910128  | -1.077064 | -0.886648 |
| 8  | 1 | 0 | 1.910558  | -1.077221 | 0.886365  |
| 9  | 8 | 0 | -2.072644 | -0.007890 | 0.000053  |
| 10 | 7 | 0 | -0.012578 | -1.062396 | 0.000093  |
| 11 | 1 | 0 | -0.361838 | -2.004974 | -0.000557 |

**002**

Standard orientation:

| Center<br>Number | Atomic<br>Number | Atomic<br>Type | Coordinates (Angstroms) |           |           |
|------------------|------------------|----------------|-------------------------|-----------|-----------|
|                  |                  |                | X                       | Y         | Z         |
| 1                | 6                | 0              | -0.596951               | 0.095813  | -0.000008 |
| 2                | 6                | 0              | 1.443174                | 0.673303  | 0.000018  |
| 3                | 7                | 0              | 0.142707                | 1.158157  | 0.000008  |
| 4                | 1                | 0              | 2.297543                | 1.332589  | -0.000056 |
| 5                | 6                | 0              | -2.079530               | 0.001959  | 0.000044  |
| 6                | 1                | 0              | -2.493566               | 1.009674  | 0.000228  |
| 7                | 1                | 0              | -2.435908               | -0.533144 | -0.884491 |
| 8                | 1                | 0              | -2.435893               | -0.533811 | 0.884096  |
| 9                | 6                | 0              | 1.412788                | -0.676177 | -0.000015 |
| 10               | 1                | 0              | 2.152825                | -1.458451 | 0.000103  |
| 11               | 8                | 0              | 0.104895                | -1.061668 | -0.000021 |

**003**

Standard orientation:

| Center<br>Number | Atomic<br>Number | Atomic<br>Type | Coordinates (Angstroms) |   |   |
|------------------|------------------|----------------|-------------------------|---|---|
|                  |                  |                | X                       | Y | Z |

| Number | Number | Type | X         | Y         | Z         |
|--------|--------|------|-----------|-----------|-----------|
| 1      | 6      | 0    | -1.400254 | -0.631564 | -0.000033 |
| 2      | 6      | 0    | -0.244539 | 1.130242  | -0.000068 |
| 3      | 7      | 0    | -1.547201 | 0.649041  | -0.000106 |
| 4      | 1      | 0    | -0.027440 | 2.187739  | -0.000114 |
| 5      | 6      | 0    | 0.625736  | 0.092967  | 0.000021  |
| 6      | 8      | 0    | -0.118633 | -1.054157 | 0.000038  |
| 7      | 1      | 0    | -2.164057 | -1.394164 | -0.000034 |
| 8      | 6      | 0    | 2.103528  | -0.040332 | 0.000110  |
| 9      | 1      | 0    | 2.452005  | -0.581210 | 0.885036  |
| 10     | 1      | 0    | 2.452097  | -0.581371 | -0.884680 |
| 11     | 1      | 0    | 2.560039  | 0.951090  | 0.000045  |

**004**

Standard orientation:

| Center<br>Number | Atomic<br>Number | Atomic<br>Type | Coordinates (Angstroms) |           |           |
|------------------|------------------|----------------|-------------------------|-----------|-----------|
|                  |                  |                | X                       | Y         | Z         |
| 1                | 6                | 0              | -1.349363               | -0.702304 | -0.000051 |
| 2                | 6                | 0              | 0.643680                | 0.017320  | 0.000025  |
| 3                | 7                | 0              | -0.134954               | -1.137597 | 0.000083  |
| 4                | 6                | 0              | -0.183460               | 1.088648  | 0.000080  |
| 5                | 8                | 0              | -1.471688               | 0.636937  | -0.000042 |
| 6                | 1                | 0              | -2.264125               | -1.275496 | -0.000077 |
| 7                | 6                | 0              | 2.133307                | -0.040979 | -0.000042 |
| 8                | 1                | 0              | 2.496313                | -0.575547 | -0.882319 |
| 9                | 1                | 0              | 2.565174                | 0.962358  | 0.000184  |
| 10               | 1                | 0              | 2.496438                | -0.575991 | 0.881896  |

|    |   |   |           |          |           |
|----|---|---|-----------|----------|-----------|
| 11 | 1 | 0 | -0.040593 | 2.156250 | -0.000001 |
|----|---|---|-----------|----------|-----------|

**005**

Standard orientation:

| Center<br>Number | Atomic<br>Number | Atomic<br>Type | Coordinates (Angstroms) |           |           |
|------------------|------------------|----------------|-------------------------|-----------|-----------|
|                  |                  |                | X                       | Y         | Z         |
| 1                | 6                | 0              | -0.868865               | 0.056411  | 0.006507  |
| 2                | 6                | 0              | 0.011047                | 1.219074  | 0.014593  |
| 3                | 6                | 0              | 1.289438                | 0.769444  | 0.002358  |
| 4                | 1                | 0              | -0.312406               | 2.248257  | 0.012782  |
| 5                | 1                | 0              | 2.195272                | 1.364266  | 0.031867  |
| 6                | 8                | 0              | -2.081683               | -0.011281 | -0.008768 |
| 7                | 7                | 0              | 1.397710                | -0.591648 | -0.092282 |
| 8                | 1                | 0              | 2.202339                | -1.065111 | 0.283499  |
| 9                | 6                | 0              | 0.069765                | -1.170838 | 0.018305  |
| 10               | 1                | 0              | -0.162218               | -1.836565 | -0.817440 |
| 11               | 1                | 0              | -0.061804               | -1.723607 | 0.954831  |

**006**

Standard orientation:

| Center<br>Number | Atomic<br>Number | Atomic<br>Type | Coordinates (Angstroms) |          |           |
|------------------|------------------|----------------|-------------------------|----------|-----------|
|                  |                  |                | X                       | Y        | Z         |
| 1                | 6                | 0              | -0.685832               | 0.063888 | -0.000095 |
| 2                | 6                | 0              | 0.124916                | 1.171544 | -0.000081 |

|    |   |   |           |           |           |
|----|---|---|-----------|-----------|-----------|
| 3  | 6 | 0 | 1.468297  | 0.682297  | 0.000074  |
| 4  | 6 | 0 | 1.420511  | -0.684394 | 0.000019  |
| 5  | 1 | 0 | -0.198590 | 2.202211  | -0.000017 |
| 6  | 1 | 0 | 2.366206  | 1.282548  | 0.000144  |
| 7  | 1 | 0 | 2.202670  | -1.426489 | -0.000316 |
| 8  | 8 | 0 | -2.030590 | -0.105906 | -0.000089 |
| 9  | 7 | 0 | 0.088947  | -1.054559 | 0.000015  |
| 10 | 1 | 0 | -0.275234 | -1.991391 | 0.000424  |
| 11 | 1 | 0 | -2.440314 | 0.762271  | 0.000869  |

**007**

Standard orientation:

| Center<br>Number | Atomic<br>Number | Atomic<br>Type | Coordinates (Angstroms) |           |           |
|------------------|------------------|----------------|-------------------------|-----------|-----------|
|                  |                  |                | X                       | Y         | Z         |
| 1                | 6                | 0              | -0.872377               | -0.016997 | -0.000025 |
| 2                | 6                | 0              | 0.087133                | -1.200856 | -0.000048 |
| 3                | 6                | 0              | 1.465562                | -0.527535 | 0.000084  |
| 4                | 1                | 0              | -0.097536               | -1.820410 | 0.881263  |
| 5                | 1                | 0              | 2.067827                | -0.780009 | -0.877463 |
| 6                | 8                | 0              | -2.078459               | -0.027922 | -0.000048 |
| 7                | 7                | 0              | 1.264371                | 0.931685  | 0.000043  |
| 8                | 6                | 0              | 0.019558                | 1.193851  | -0.000008 |
| 9                | 1                | 0              | -0.362662               | 2.211414  | -0.000032 |
| 10               | 1                | 0              | 2.067607                | -0.779959 | 0.877799  |
| 11               | 1                | 0              | -0.097423               | -1.820235 | -0.881509 |

**008**

Standard orientation:

| Center<br>Number | Atomic<br>Number | Atomic<br>Type | Coordinates (Angstroms) |           |           |
|------------------|------------------|----------------|-------------------------|-----------|-----------|
|                  |                  |                | X                       | Y         | Z         |
| 1                | 6                | 0              | 0.847778                | 0.019040  | -0.000112 |
| 2                | 6                | 0              | -0.080633               | 1.232501  | -0.000062 |
| 3                | 6                | 0              | -1.427700               | 0.561856  | 0.000208  |
| 4                | 1                | 0              | 0.090719                | 1.860745  | 0.880761  |
| 5                | 1                | 0              | -2.363948               | 1.118028  | 0.000443  |
| 6                | 8                | 0              | 2.052392                | 0.021500  | 0.000052  |
| 7                | 7                | 0              | -1.441654               | -0.712825 | -0.000186 |
| 8                | 6                | 0              | -0.069075               | -1.206134 | 0.000045  |
| 9                | 1                | 0              | 0.116594                | -1.832812 | -0.879171 |
| 10               | 1                | 0              | 0.090125                | 1.860321  | -0.881412 |
| 11               | 1                | 0              | 0.116722                | -1.832085 | 0.879794  |

**009**

Standard orientation:

| Center<br>Number | Atomic<br>Number | Atomic<br>Type | Coordinates (Angstroms) |           |           |
|------------------|------------------|----------------|-------------------------|-----------|-----------|
|                  |                  |                | X                       | Y         | Z         |
| 1                | 6                | 0              | -1.411011               | 0.726901  | -0.000174 |
| 2                | 6                | 0              | -0.153826               | 1.188056  | 0.000158  |
| 3                | 6                | 0              | 0.695446                | -0.009028 | -0.000487 |
| 4                | 7                | 0              | 0.066831                | -1.128064 | 0.000125  |
| 5                | 6                | 0              | -1.343167               | -0.775258 | 0.000031  |
| 6                | 1                | 0              | -1.841525               | -1.202420 | 0.879904  |

|    |   |   |           |           |           |
|----|---|---|-----------|-----------|-----------|
| 7  | 1 | 0 | 0.201621  | 2.209192  | 0.000232  |
| 8  | 1 | 0 | -1.841804 | -1.203708 | -0.878961 |
| 9  | 8 | 0 | 2.029623  | 0.100448  | 0.000180  |
| 10 | 1 | 0 | 2.378310  | -0.799910 | -0.000445 |
| 11 | 1 | 0 | -2.326059 | 1.305695  | -0.000208 |

**010**

Standard orientation:

| Center<br>Number | Atomic<br>Number | Atomic<br>Type | Coordinates (Angstroms) |           |           |
|------------------|------------------|----------------|-------------------------|-----------|-----------|
|                  |                  |                | X                       | Y         | Z         |
| 1                | 6                | 0              | 0.723696                | -0.029358 | 0.000064  |
| 2                | 6                | 0              | -0.072593               | 1.148483  | -0.000004 |
| 3                | 6                | 0              | -1.386963               | 0.738567  | -0.000051 |
| 4                | 1                | 0              | 0.277013                | 2.171533  | 0.000079  |
| 5                | 1                | 0              | -2.299617               | 1.314056  | 0.000089  |
| 6                | 8                | 0              | 2.083806                | -0.122768 | -0.000058 |
| 7                | 7                | 0              | -1.404947               | -0.623344 | -0.000097 |
| 8                | 1                | 0              | -2.233388               | -1.190605 | 0.000416  |
| 9                | 6                | 0              | -0.118050               | -1.115076 | 0.000078  |
| 10               | 1                | 0              | 0.097331                | -2.170693 | -0.000164 |
| 11               | 1                | 0              | 2.446301                | 0.765569  | 0.000202  |

**011**

Standard orientation:

| Center<br>Number | Atomic<br>Number | Atomic<br>Type | Coordinates (Angstroms) |  |  |
|------------------|------------------|----------------|-------------------------|--|--|
|------------------|------------------|----------------|-------------------------|--|--|

| Number | Number | Type | X         | Y         | Z         |
|--------|--------|------|-----------|-----------|-----------|
| 1      | 6      | 0    | 0.723400  | 0.020352  | -0.000003 |
| 2      | 6      | 0    | -0.121122 | 1.160868  | -0.000062 |
| 3      | 6      | 0    | -1.414683 | 0.694719  | 0.000059  |
| 4      | 1      | 0    | 0.197245  | 2.191955  | -0.000118 |
| 5      | 1      | 0    | -2.351360 | 1.230514  | 0.000123  |
| 6      | 8      | 0    | 2.083324  | 0.103605  | -0.000114 |
| 7      | 1      | 0    | 2.446938  | -0.784911 | 0.001165  |
| 8      | 7      | 0    | -1.379613 | -0.668367 | -0.000052 |
| 9      | 1      | 0    | -2.183416 | -1.269688 | 0.000032  |
| 10     | 6      | 0    | -0.070775 | -1.103421 | 0.000022  |
| 11     | 1      | 0    | 0.180370  | -2.153250 | -0.000022 |

**012**

Standard orientation:

| Center<br>Number | Atomic<br>Number | Atomic<br>Type | Coordinates (Angstroms) |           |           |
|------------------|------------------|----------------|-------------------------|-----------|-----------|
|                  |                  |                | X                       | Y         | Z         |
| 1                | 6                | 0              | 0.685738                | 0.105565  | -0.000025 |
| 2                | 6                | 0              | -0.166794               | 1.177205  | 0.000113  |
| 3                | 6                | 0              | -1.490604               | 0.642120  | -0.000094 |
| 4                | 6                | 0              | -1.399344               | -0.721757 | 0.000224  |
| 5                | 1                | 0              | 0.130085                | 2.214121  | 0.000224  |
| 6                | 1                | 0              | -2.408954               | 1.210707  | -0.000129 |
| 7                | 1                | 0              | -2.154420               | -1.491469 | 0.000439  |
| 8                | 8                | 0              | 2.041677                | 0.117982  | -0.000310 |
| 9                | 7                | 0              | -0.053175               | -1.047716 | -0.000042 |
| 10               | 1                | 0              | 0.312157                | -1.984272 | -0.000627 |

|    |   |   |          |           |          |
|----|---|---|----------|-----------|----------|
| 11 | 1 | 0 | 2.385962 | -0.777730 | 0.001554 |
|----|---|---|----------|-----------|----------|

013

Standard orientation:

| Center<br>Number | Atomic<br>Number | Atomic<br>Type | Coordinates (Angstroms) |           |           |
|------------------|------------------|----------------|-------------------------|-----------|-----------|
|                  |                  |                | X                       | Y         | Z         |
| 1                | 6                | 0              | -1.369643               | 0.790105  | -0.000096 |
| 2                | 6                | 0              | -0.086548               | 1.168253  | -0.000261 |
| 3                | 6                | 0              | 0.695331                | -0.084738 | 0.000212  |
| 4                | 7                | 0              | -0.007466               | -1.155577 | 0.000169  |
| 5                | 6                | 0              | -1.388426               | -0.712142 | -0.000098 |
| 6                | 1                | 0              | -1.912902               | -1.108960 | 0.878902  |
| 7                | 1                | 0              | 0.316423                | 2.174488  | -0.000487 |
| 8                | 1                | 0              | -1.912745               | -1.109141 | -0.879107 |
| 9                | 8                | 0              | 2.039500                | -0.128624 | 0.000124  |
| 10               | 1                | 0              | -2.245963               | 1.425935  | -0.000224 |
| 11               | 1                | 0              | 2.387168                | 0.766829  | 0.000198  |

014

Standard orientation:

| Center<br>Number | Atomic<br>Number | Atomic<br>Type | Coordinates (Angstroms) |           |           |
|------------------|------------------|----------------|-------------------------|-----------|-----------|
|                  |                  |                | X                       | Y         | Z         |
| 1                | 6                | 0              | 0.816656                | -0.012650 | -0.000005 |
| 2                | 6                | 0              | -1.314719               | 0.809443  | -0.000016 |

|    |   |   |           |           |           |
|----|---|---|-----------|-----------|-----------|
| 3  | 6 | 0 | -0.041987 | 1.194135  | -0.000006 |
| 4  | 1 | 0 | 0.349988  | 2.202260  | 0.000000  |
| 5  | 1 | 0 | 2.529051  | 0.738034  | 0.000049  |
| 6  | 7 | 0 | 2.072430  | -0.171319 | 0.000026  |
| 7  | 6 | 0 | -1.362518 | -0.688757 | 0.000006  |
| 8  | 1 | 0 | -1.864854 | -1.092158 | -0.887756 |
| 9  | 8 | 0 | -0.005510 | -1.100827 | -0.000017 |
| 10 | 1 | 0 | -1.864818 | -1.092118 | 0.887809  |
| 11 | 1 | 0 | -2.196886 | 1.436812  | -0.000025 |

015

Standard orientation:

| Center<br>Number | Atomic<br>Number | Atomic<br>Type | Coordinates (Angstroms) |           |           |
|------------------|------------------|----------------|-------------------------|-----------|-----------|
|                  |                  |                | X                       | Y         | Z         |
| 1                | 6                | 0              | -1.355994               | 0.751223  | -0.000030 |
| 2                | 6                | 0              | -0.106843               | 1.208502  | 0.000054  |
| 3                | 6                | 0              | 0.813973                | 0.059774  | -0.000196 |
| 4                | 6                | 0              | -1.324926               | -0.748575 | 0.000029  |
| 5                | 1                | 0              | -1.800421               | -1.181347 | 0.888406  |
| 6                | 1                | 0              | 0.241707                | 2.230857  | 0.000128  |
| 7                | 1                | 0              | -1.800456               | -1.181446 | -0.888281 |
| 8                | 1                | 0              | -2.272616               | 1.326822  | -0.000030 |
| 9                | 7                | 0              | 2.077892                | 0.100052  | 0.000050  |
| 10               | 1                | 0              | 2.460876                | -0.845790 | 0.000135  |
| 11               | 8                | 0              | 0.058551                | -1.084375 | 0.000019  |

**016**

Standard orientation:

| Center<br>Number | Atomic<br>Number | Atomic<br>Type | Coordinates (Angstroms) |           |           |
|------------------|------------------|----------------|-------------------------|-----------|-----------|
|                  |                  |                | X                       | Y         | Z         |
| 1                | 6                | 0              | -0.703576               | 0.108192  | -0.000109 |
| 2                | 6                | 0              | 0.134329                | 1.158971  | 0.000141  |
| 3                | 6                | 0              | 1.210718                | -0.885834 | 0.000154  |
| 4                | 6                | 0              | 1.516686                | 0.583397  | -0.000009 |
| 5                | 1                | 0              | 2.114006                | 0.854802  | -0.881050 |
| 6                | 7                | 0              | -0.046900               | -1.148206 | -0.000153 |
| 7                | 8                | 0              | -2.045340               | 0.103607  | -0.000077 |
| 8                | 1                | 0              | -2.318535               | -0.820384 | 0.001011  |
| 9                | 1                | 0              | -0.124553               | 2.206001  | 0.000400  |
| 10               | 1                | 0              | 1.955753                | -1.676090 | 0.000626  |
| 11               | 1                | 0              | 2.115409                | 0.855903  | 0.879640  |

**017**

Standard orientation:

| Center<br>Number | Atomic<br>Number | Atomic<br>Type | Coordinates (Angstroms) |           |           |
|------------------|------------------|----------------|-------------------------|-----------|-----------|
|                  |                  |                | X                       | Y         | Z         |
| 1                | 6                | 0              | -1.432296               | 0.660551  | -0.000012 |
| 2                | 6                | 0              | 0.710644                | 0.059451  | -0.000129 |
| 3                | 6                | 0              | -0.061608               | 1.165832  | -0.000051 |
| 4                | 1                | 0              | 0.244843                | 2.203425  | 0.000183  |
| 5                | 6                | 0              | -0.190028               | -1.140159 | 0.000105  |
| 6                | 8                | 0              | 2.042001                | -0.103798 | -0.000291 |

|    |   |   |           |           |           |
|----|---|---|-----------|-----------|-----------|
| 7  | 1 | 0 | 2.469757  | 0.758137  | 0.001778  |
| 8  | 7 | 0 | -1.550328 | -0.623165 | -0.000107 |
| 9  | 1 | 0 | -2.313913 | 1.298255  | 0.000014  |
| 10 | 1 | 0 | -0.022215 | -1.771558 | -0.880213 |
| 11 | 1 | 0 | -0.022463 | -1.769768 | 0.881840  |

**018**

Standard orientation:

| Center<br>Number | Atomic<br>Number | Atomic<br>Type | Coordinates (Angstroms) |           |           |
|------------------|------------------|----------------|-------------------------|-----------|-----------|
|                  |                  |                | X                       | Y         | Z         |
| 1                | 6                | 0              | -0.704839               | 0.028517  | 0.000007  |
| 2                | 6                | 0              | 0.062653                | 1.135862  | 0.000081  |
| 3                | 6                | 0              | 1.266184                | -0.828676 | -0.000191 |
| 4                | 6                | 0              | 1.480798                | 0.657839  | 0.000028  |
| 5                | 1                | 0              | 2.057384                | 0.969646  | -0.881096 |
| 6                | 7                | 0              | 0.031008                | -1.178764 | -0.000019 |
| 7                | 8                | 0              | -2.039619               | -0.124374 | -0.000042 |
| 8                | 1                | 0              | -0.258088               | 2.167700  | -0.000522 |
| 9                | 1                | 0              | 2.063015                | -1.567048 | 0.000604  |
| 10               | 1                | 0              | 2.057332                | 0.969160  | 0.881367  |
| 11               | 1                | 0              | -2.448522               | 0.745625  | 0.000565  |

**019**

Standard orientation:

| Center<br>Number | Atomic<br>Number | Atomic<br>Type | Coordinates (Angstroms) |           |           |
|------------------|------------------|----------------|-------------------------|-----------|-----------|
|                  |                  |                | X                       | Y         | Z         |
| 1                | 6                | 0              | 1.458181                | 0.611402  | -0.000040 |
| 2                | 6                | 0              | -0.709121               | 0.111488  | -0.000086 |
| 3                | 6                | 0              | 0.114114                | 1.177704  | 0.000146  |
| 4                | 1                | 0              | -0.154571               | 2.223898  | 0.000696  |
| 5                | 6                | 0              | 0.141215                | -1.131808 | 0.000237  |
| 6                | 8                | 0              | -2.052674               | 0.123736  | -0.000194 |
| 7                | 1                | 0              | -2.385323               | -0.778006 | -0.000237 |
| 8                | 7                | 0              | 1.522797                | -0.677741 | -0.000415 |
| 9                | 1                | 0              | 2.368875                | 1.206448  | -0.000214 |
| 10               | 1                | 0              | -0.046135               | -1.754119 | 0.885106  |
| 11               | 1                | 0              | -0.047369               | -1.756641 | -0.882430 |

**020**

Standard orientation:

| Center<br>Number | Atomic<br>Number | Atomic<br>Type | Coordinates (Angstroms) |           |           |
|------------------|------------------|----------------|-------------------------|-----------|-----------|
|                  |                  |                | X                       | Y         | Z         |
| 1                | 6                | 0              | 0.143006                | 1.130653  | -0.000123 |
| 2                | 6                | 0              | -0.731622               | -0.049862 | 0.000015  |
| 3                | 6                | 0              | 1.470346                | -0.616187 | -0.000016 |
| 4                | 8                | 0              | -2.073028               | 0.097991  | 0.000071  |
| 5                | 6                | 0              | 0.064085                | -1.133546 | -0.000005 |
| 6                | 1                | 0              | -0.222731               | -2.176857 | 0.000025  |
| 7                | 1                | 0              | 2.043980                | -0.936190 | -0.879059 |
| 8                | 7                | 0              | 1.392844                | 0.841855  | 0.000022  |
| 9                | 1                | 0              | -0.218971               | 2.155762  | -0.000093 |
| 10               | 1                | 0              | 2.043977                | -0.936199 | 0.879025  |

|    |   |   |           |           |          |
|----|---|---|-----------|-----------|----------|
| 11 | 1 | 0 | -2.486828 | -0.769776 | 0.000144 |
|----|---|---|-----------|-----------|----------|

**021**

Standard orientation:

| Center<br>Number | Atomic<br>Number | Atomic<br>Type | Coordinates (Angstroms) |           |           |
|------------------|------------------|----------------|-------------------------|-----------|-----------|
|                  |                  |                | X                       | Y         | Z         |
| 1                | 6                | 0              | 1.493792                | -0.568411 | -0.000109 |
| 2                | 6                | 0              | -0.730866               | -0.098254 | 0.000090  |
| 3                | 6                | 0              | 0.112401                | -1.143793 | 0.000022  |
| 4                | 1                | 0              | -0.140173               | -2.194252 | -0.000083 |
| 5                | 6                | 0              | 0.097650                | 1.117771  | 0.000240  |
| 6                | 8                | 0              | -2.082153               | -0.128323 | 0.000040  |
| 7                | 7                | 0              | 1.359084                | 0.885570  | 0.000037  |
| 8                | 1                | 0              | 2.081575                | -0.863487 | 0.878368  |
| 9                | 1                | 0              | 2.081422                | -0.863441 | -0.878709 |
| 10               | 1                | 0              | -0.295160               | 2.134758  | -0.000852 |
| 11               | 1                | 0              | -2.421887               | 0.770136  | -0.000762 |

**022**

Standard orientation:

| Center<br>Number | Atomic<br>Number | Atomic<br>Type | Coordinates (Angstroms) |          |           |
|------------------|------------------|----------------|-------------------------|----------|-----------|
|                  |                  |                | X                       | Y        | Z         |
| 1                | 6                | 0              | -1.309766               | 0.729739 | -0.000034 |
| 2                | 6                | 0              | -0.051952               | 1.198589 | -0.000024 |



|    |   |   |           |           |           |
|----|---|---|-----------|-----------|-----------|
| 3  | 6 | 0 | 0.835982  | 0.036377  | 0.000034  |
| 4  | 1 | 0 | 0.246580  | 2.236228  | -0.000046 |
| 5  | 1 | 0 | -2.248161 | 1.270091  | -0.000072 |
| 6  | 7 | 0 | 2.102224  | -0.105122 | 0.000053  |
| 7  | 6 | 0 | -0.107866 | -1.156313 | 0.000010  |
| 8  | 1 | 0 | 0.014699  | -1.776130 | 0.891435  |
| 9  | 1 | 0 | 0.014750  | -1.776146 | -0.891397 |
| 10 | 8 | 0 | -1.437275 | -0.609762 | -0.000031 |
| 11 | 1 | 0 | 2.556386  | 0.809558  | 0.000034  |

**023**

Standard orientation:

| Center<br>Number | Atomic<br>Number | Atomic<br>Type | Coordinates (Angstroms) |           |           |
|------------------|------------------|----------------|-------------------------|-----------|-----------|
|                  |                  |                | X                       | Y         | Z         |
| 1                | 6                | 0              | -0.708894               | 0.027457  | -0.000167 |
| 2                | 6                | 0              | 0.058847                | 1.133283  | -0.000034 |
| 3                | 6                | 0              | 1.527869                | -0.474720 | -0.000083 |
| 4                | 8                | 0              | -2.047263               | -0.136125 | -0.000079 |
| 5                | 1                | 0              | -0.249628               | 2.170770  | -0.000108 |
| 6                | 1                | 0              | 2.485895                | -0.985451 | -0.000782 |
| 7                | 1                | 0              | -2.468407               | 0.728871  | 0.000408  |
| 8                | 7                | 0              | 1.441811                | 0.807377  | 0.000119  |
| 9                | 6                | 0              | 0.192460                | -1.165914 | 0.000042  |
| 10               | 1                | 0              | 0.047738                | -1.799768 | -0.882428 |
| 11               | 1                | 0              | 0.048140                | -1.797693 | 0.884156  |

**024**

Standard orientation:

| Center<br>Number | Atomic<br>Number | Atomic<br>Type | Coordinates (Angstroms) |           |           |
|------------------|------------------|----------------|-------------------------|-----------|-----------|
|                  |                  |                | X                       | Y         | Z         |
| 1                | 6                | 0              | -1.341997               | 0.683044  | 0.000007  |
| 2                | 6                | 0              | -0.108089               | 1.206430  | -0.000050 |
| 3                | 6                | 0              | 0.833837                | 0.092464  | 0.000034  |
| 4                | 1                | 0              | 0.158372                | 2.251592  | -0.000090 |
| 5                | 1                | 0              | -2.305484               | 1.176011  | -0.000012 |
| 6                | 7                | 0              | 2.105902                | 0.170527  | 0.000059  |
| 7                | 1                | 0              | 2.522934                | -0.762606 | 0.000052  |
| 8                | 6                | 0              | -0.057639               | -1.147566 | 0.000013  |
| 9                | 1                | 0              | 0.092951                | -1.762588 | 0.892191  |
| 10               | 1                | 0              | 0.093042                | -1.762600 | -0.892144 |
| 11               | 8                | 0              | -1.407474               | -0.667466 | -0.000054 |

**025**

Standard orientation:

| Center<br>Number | Atomic<br>Number | Atomic<br>Type | Coordinates (Angstroms) |           |           |
|------------------|------------------|----------------|-------------------------|-----------|-----------|
|                  |                  |                | X                       | Y         | Z         |
| 1                | 6                | 0              | 0.123619                | 1.153893  | 0.000083  |
| 2                | 6                | 0              | 1.392781                | -0.612952 | 0.000077  |
| 3                | 1                | 0              | -0.214004               | 2.185671  | 0.000137  |
| 4                | 1                | 0              | 1.910129                | -0.980256 | -0.893239 |
| 5                | 8                | 0              | 0.046161                | -1.098565 | -0.000047 |
| 6                | 6                | 0              | -2.104604               | -0.051468 | -0.000196 |

|    |   |   |           |           |           |
|----|---|---|-----------|-----------|-----------|
| 7  | 1 | 0 | -2.665432 | 0.874237  | -0.000355 |
| 8  | 1 | 0 | -2.643688 | -0.989866 | 0.000135  |
| 9  | 6 | 0 | -0.772368 | -0.012324 | -0.000084 |
| 10 | 1 | 0 | 1.910010  | -0.980355 | 0.893420  |
| 11 | 7 | 0 | 1.356733  | 0.830884  | 0.000143  |

026

Standard orientation:

| Center<br>Number | Atomic<br>Number | Atomic<br>Type | Coordinates (Angstroms) |           |           |
|------------------|------------------|----------------|-------------------------|-----------|-----------|
|                  |                  |                | X                       | Y         | Z         |
| 1                | 6                | 0              | 0.709529                | -0.077696 | -0.000008 |
| 2                | 6                | 0              | -0.106974               | -1.145618 | -0.000180 |
| 3                | 6                | 0              | -1.509504               | 0.524460  | -0.000095 |
| 4                | 8                | 0              | 2.060764                | -0.089702 | 0.000166  |
| 5                | 1                | 0              | 0.163181                | -2.191655 | -0.000261 |
| 6                | 1                | 0              | -2.443671               | 1.077487  | -0.000110 |
| 7                | 7                | 0              | -1.473373               | -0.759138 | -0.000247 |
| 8                | 6                | 0              | -0.144890               | 1.158977  | 0.000234  |
| 9                | 1                | 0              | 0.014664                | 1.786878  | -0.885508 |
| 10               | 1                | 0              | 0.014313                | 1.785875  | 0.886780  |
| 11               | 1                | 0              | 2.390049                | 0.812257  | -0.000203 |

027

Standard orientation:

| Center<br>Number | Atomic<br>Number | Atomic<br>Type | Coordinates (Angstroms) |           |           |
|------------------|------------------|----------------|-------------------------|-----------|-----------|
|                  |                  |                | X                       | Y         | Z         |
| 1                | 6                | 0              | 0.616389                | 0.111584  | -0.000170 |
| 2                | 6                | 0              | -0.258788               | 1.152088  | 0.000103  |
| 3                | 6                | 0              | -1.526743               | 0.514358  | 0.000115  |
| 4                | 8                | 0              | -0.065291               | -1.044863 | 0.000518  |
| 5                | 1                | 0              | -0.035727               | 2.206844  | 0.000200  |
| 6                | 1                | 0              | -2.511194               | 0.961850  | 0.000140  |
| 7                | 7                | 0              | -1.423096               | -0.789207 | -0.000512 |
| 8                | 6                | 0              | 2.100155                | 0.014074  | -0.000134 |
| 9                | 1                | 0              | 2.451914                | -0.523794 | 0.884457  |
| 10               | 1                | 0              | 2.451775                | -0.525819 | -0.883539 |
| 11               | 1                | 0              | 2.541153                | 1.011649  | -0.001305 |

028

Standard orientation:

| Center<br>Number | Atomic<br>Number | Atomic<br>Type | Coordinates (Angstroms) |           |           |
|------------------|------------------|----------------|-------------------------|-----------|-----------|
|                  |                  |                | X                       | Y         | Z         |
| 1                | 6                | 0              | -0.709395               | 0.010946  | 0.388115  |
| 2                | 6                | 0              | 1.427298                | 0.678106  | -0.149145 |
| 3                | 8                | 0              | -1.937439               | 0.017339  | -0.274515 |
| 4                | 1                | 0              | 2.346392                | 1.210935  | -0.356964 |
| 5                | 6                | 0              | 0.214974                | 1.179374  | 0.105567  |
| 6                | 7                | 0              | 0.086105                | -1.197328 | 0.144305  |
| 7                | 6                | 0              | 1.276143                | -0.792733 | -0.109412 |
| 8                | 1                | 0              | 2.084579                | -1.498471 | -0.288387 |
| 9                | 1                | 0              | -0.941009               | 0.012232  | 1.463030  |

|    |   |   |           |           |           |
|----|---|---|-----------|-----------|-----------|
| 10 | 1 | 0 | -0.088546 | 2.216462  | 0.162275  |
| 11 | 1 | 0 | -1.758752 | -0.152727 | -1.204719 |

---

**029**

Standard orientation:

| Center<br>Number | Atomic<br>Number | Atomic<br>Type | Coordinates (Angstroms) |           |           |
|------------------|------------------|----------------|-------------------------|-----------|-----------|
|                  |                  |                | X                       | Y         | Z         |
| 1                | 6                | 0              | 0.631004                | 0.025081  | 0.000219  |
| 2                | 7                | 0              | -0.034425               | -1.105221 | 0.000201  |
| 3                | 6                | 0              | 2.128706                | 0.026056  | -0.000186 |
| 4                | 1                | 0              | 2.515194                | -0.489460 | 0.882153  |
| 5                | 1                | 0              | 2.514833                | -0.487120 | -0.884057 |
| 6                | 1                | 0              | 2.511350                | 1.048139  | 0.001050  |
| 7                | 6                | 0              | -1.480890               | 0.571101  | -0.000158 |
| 8                | 1                | 0              | -2.486467               | 0.963421  | -0.000506 |
| 9                | 6                | 0              | -0.253111               | 1.143004  | 0.000190  |
| 10               | 1                | 0              | -0.000621               | 2.191262  | 0.000332  |
| 11               | 8                | 0              | -1.370946               | -0.760144 | -0.000096 |

---

**030**

Standard orientation:

| Center<br>Number | Atomic<br>Number | Atomic<br>Type | Coordinates (Angstroms) |          |           |
|------------------|------------------|----------------|-------------------------|----------|-----------|
|                  |                  |                | X                       | Y        | Z         |
| 1                | 6                | 0              | 0.235663                | 1.094195 | 0.000527  |
| 2                | 7                | 0              | 1.488293                | 0.719924 | -0.000394 |

|    |   |   |           |           |           |
|----|---|---|-----------|-----------|-----------|
| 3  | 6 | 0 | 0.183578  | -1.067043 | 0.000436  |
| 4  | 1 | 0 | 0.030263  | -2.135913 | 0.000519  |
| 5  | 6 | 0 | -0.666740 | -0.009308 | -0.000026 |
| 6  | 8 | 0 | 1.458839  | -0.656317 | -0.000211 |
| 7  | 6 | 0 | -2.161764 | 0.008230  | -0.000246 |
| 8  | 1 | 0 | -2.551793 | 0.523409  | 0.882554  |
| 9  | 1 | 0 | -2.551654 | 0.523061  | -0.883312 |
| 10 | 1 | 0 | -2.564310 | -1.007222 | -0.000081 |
| 11 | 1 | 0 | 0.004304  | 2.151284  | 0.000620  |

---

**031**

Standard orientation:

| Center<br>Number | Atomic<br>Number | Atomic<br>Type | Coordinates (Angstroms) |           |           |
|------------------|------------------|----------------|-------------------------|-----------|-----------|
|                  |                  |                | X                       | Y         | Z         |
| 1                | 6                | 0              | -0.703019               | -0.016181 | 0.368575  |
| 2                | 6                | 0              | 1.419888                | 0.703337  | -0.142227 |
| 3                | 8                | 0              | -1.874548               | -0.091990 | -0.395357 |
| 4                | 1                | 0              | 2.328285                | 1.257851  | -0.340252 |
| 5                | 6                | 0              | 0.194872                | 1.177369  | 0.101835  |
| 6                | 1                | 0              | -2.483011               | 0.577868  | -0.073317 |
| 7                | 7                | 0              | 0.115513                | -1.198747 | 0.130575  |
| 8                | 6                | 0              | 1.299480                | -0.769452 | -0.107170 |
| 9                | 1                | 0              | 2.123971                | -1.459459 | -0.271717 |
| 10               | 1                | 0              | -0.926532               | -0.030924 | 1.451918  |
| 11               | 1                | 0              | -0.122238               | 2.211381  | 0.156123  |

---

**032**

Standard orientation:

| Center<br>Number | Atomic<br>Number | Atomic<br>Type | Coordinates (Angstroms) |           |           |
|------------------|------------------|----------------|-------------------------|-----------|-----------|
|                  |                  |                | X                       | Y         | Z         |
| 1                | 6                | 0              | 0.792418                | 0.006612  | 0.000183  |
| 2                | 6                | 0              | -0.161256               | -1.158341 | 0.000381  |
| 3                | 7                | 0              | -1.354703               | 0.816794  | -0.000276 |
| 4                | 6                | 0              | -0.116789               | 1.149415  | 0.000477  |
| 5                | 1                | 0              | 0.157190                | 2.196325  | 0.000156  |
| 6                | 1                | 0              | -0.069464               | -1.786226 | -0.891691 |
| 7                | 8                | 0              | -1.468656               | -0.556588 | -0.000365 |
| 8                | 1                | 0              | -0.069824               | -1.785576 | 0.892995  |
| 9                | 6                | 0              | 2.124903                | 0.013644  | -0.000297 |
| 10               | 1                | 0              | 2.701867                | -0.904805 | -0.000946 |
| 11               | 1                | 0              | 2.676741                | 0.947446  | -0.000129 |

**100**

Standard orientation:

| Center<br>Number | Atomic<br>Number | Atomic<br>Type | Coordinates (Angstroms) |           |           |
|------------------|------------------|----------------|-------------------------|-----------|-----------|
|                  |                  |                | X                       | Y         | Z         |
| 1                | 6                | 0              | 1.418321                | -0.221029 | 0.000452  |
| 2                | 6                | 0              | 0.761579                | 1.132795  | -0.000242 |
| 3                | 6                | 0              | -0.559828               | 1.236862  | -0.000164 |
| 4                | 6                | 0              | -0.773118               | -1.070905 | -0.000199 |
| 5                | 7                | 0              | 0.460156                | -1.324106 | -0.000472 |
| 6                | 1                | 0              | -1.120804               | 2.162223  | -0.000485 |

|    |   |   |           |           |           |
|----|---|---|-----------|-----------|-----------|
| 7  | 1 | 0 | 2.072414  | -0.340065 | -0.873224 |
| 8  | 1 | 0 | 1.367120  | 2.031866  | -0.001007 |
| 9  | 1 | 0 | -1.513732 | -1.866210 | -0.000602 |
| 10 | 8 | 0 | -1.397312 | 0.144342  | 0.000517  |
| 11 | 1 | 0 | 2.070686  | -0.340150 | 0.875408  |

**101**

Standard orientation:

| Center<br>Number | Atomic<br>Number | Atomic<br>Type | Coordinates (Angstroms) |           |           |
|------------------|------------------|----------------|-------------------------|-----------|-----------|
|                  |                  |                | X                       | Y         | Z         |
| 1                | 6                | 0              | -0.991966               | -0.948549 | -0.056237 |
| 2                | 6                | 0              | -1.278497               | 0.511328  | 0.137992  |
| 3                | 6                | 0              | 1.081645                | 0.756685  | 0.004059  |
| 4                | 6                | 0              | 0.275189                | -1.360811 | -0.038837 |
| 5                | 1                | 0              | -1.821037               | -1.634271 | -0.188771 |
| 6                | 1                | 0              | -1.579394               | 0.735477  | 1.172578  |
| 7                | 1                | 0              | 1.863082                | 1.512768  | 0.005131  |
| 8                | 1                | 0              | 0.545969                | -2.403583 | -0.165193 |
| 9                | 7                | 0              | 1.365322                | -0.479642 | 0.114182  |
| 10               | 8                | 0              | -0.126285               | 1.316277  | -0.172732 |
| 11               | 1                | 0              | -2.073824               | 0.864973  | -0.523028 |

**102**

Standard orientation:

| Center<br>Number | Atomic<br>Number | Atomic<br>Type | Coordinates (Angstroms) |   |   |
|------------------|------------------|----------------|-------------------------|---|---|
|                  |                  |                | X                       | Y | Z |

| Number | Number | Type | X         | Y         | Z         |
|--------|--------|------|-----------|-----------|-----------|
| 1      | 6      | 0    | 0.223335  | 1.353025  | -0.079628 |
| 2      | 6      | 0    | 1.312802  | 0.419561  | 0.166119  |
| 3      | 6      | 0    | 1.016650  | -0.879789 | -0.018483 |
| 4      | 6      | 0    | -1.241255 | -0.372933 | 0.222823  |
| 5      | 7      | 0    | -1.007828 | 1.004023  | -0.136075 |
| 6      | 1      | 0    | 1.747472  | -1.679531 | -0.085298 |
| 7      | 1      | 0    | 2.333034  | 0.750322  | 0.302437  |
| 8      | 1      | 0    | -1.304774 | -0.455091 | 1.320685  |
| 9      | 8      | 0    | -0.235503 | -1.303517 | -0.226281 |
| 10     | 1      | 0    | -2.168097 | -0.730003 | -0.224725 |
| 11     | 1      | 0    | 0.462005  | 2.395089  | -0.295300 |

**103**

Standard orientation:

| Center<br>Number | Atomic<br>Number | Atomic<br>Type | Coordinates (Angstroms) |           |           |
|------------------|------------------|----------------|-------------------------|-----------|-----------|
|                  |                  |                | X                       | Y         | Z         |
| 1                | 6                | 0              | 1.208468                | 0.614617  | 0.159055  |
| 2                | 6                | 0              | 1.121121                | -0.712828 | -0.021043 |
| 3                | 6                | 0              | -1.163876               | -0.589359 | 0.265304  |
| 4                | 1                | 0              | 1.967741                | -1.387747 | -0.067816 |
| 5                | 1                | 0              | 2.155353                | 1.099499  | 0.355601  |
| 6                | 1                | 0              | -1.167514               | -0.693985 | 1.363630  |
| 7                | 8                | 0              | -0.063030               | -1.322950 | -0.265146 |
| 8                | 1                | 0              | -2.067932               | -1.046478 | -0.137956 |
| 9                | 6                | 0              | -1.033197               | 0.866336  | -0.111200 |
| 10               | 1                | 0              | -1.914944               | 1.436049  | -0.402021 |

11 7 0 0.105206 1.443380 -0.106137

**104**

Standard orientation:

| Center<br>Number | Atomic<br>Number | Atomic<br>Type | Coordinates (Angstroms) |           |           |
|------------------|------------------|----------------|-------------------------|-----------|-----------|
|                  |                  |                | X                       | Y         | Z         |
| 1                | 6                | 0              | -0.009587               | 0.644889  | 1.176075  |
| 2                | 6                | 0              | -0.009587               | -0.684184 | 1.153367  |
| 3                | 6                | 0              | -0.009587               | -0.684184 | -1.153367 |
| 4                | 1                | 0              | -0.014491               | -1.296175 | 2.044155  |
| 5                | 1                | 0              | -0.025606               | 1.177217  | 2.118386  |
| 6                | 8                | 0              | 0.036103                | -1.442790 | -0.000000 |
| 7                | 1                | 0              | -0.014491               | -1.296175 | -2.044155 |
| 8                | 6                | 0              | -0.009587               | 0.644889  | -1.176075 |
| 9                | 1                | 0              | -0.025606               | 1.177217  | -2.118386 |
| 10               | 7                | 0              | 0.084341                | 1.434667  | 0.000000  |
| 11               | 1                | 0              | -0.568930               | 2.209106  | 0.000000  |

**105**

Standard orientation:

| Center<br>Number | Atomic<br>Number | Atomic<br>Type | Coordinates (Angstroms) |           |           |
|------------------|------------------|----------------|-------------------------|-----------|-----------|
|                  |                  |                | X                       | Y         | Z         |
| 1                | 6                | 0              | -0.881760               | -1.008925 | 0.000061  |
| 2                | 6                | 0              | 1.440490                | -0.229685 | -0.000176 |

|    |   |   |           |           |           |
|----|---|---|-----------|-----------|-----------|
| 3  | 1 | 0 | -1.687987 | -1.732574 | 0.000252  |
| 4  | 1 | 0 | 2.101901  | -0.288496 | 0.875306  |
| 5  | 6 | 0 | 0.735712  | 1.098294  | 0.000155  |
| 6  | 1 | 0 | 1.332971  | 2.007725  | 0.000392  |
| 7  | 7 | 0 | -0.516554 | 1.338090  | 0.000063  |
| 8  | 8 | 0 | -1.395331 | 0.254940  | -0.000182 |
| 9  | 6 | 0 | 0.409228  | -1.317390 | 0.000111  |
| 10 | 1 | 0 | 0.708336  | -2.358191 | 0.000308  |
| 11 | 1 | 0 | 2.101281  | -0.288377 | -0.876150 |

**106**

Standard orientation:

| Center<br>Number | Atomic<br>Number | Atomic<br>Type | Coordinates (Angstroms) |           |           |
|------------------|------------------|----------------|-------------------------|-----------|-----------|
|                  |                  |                | X                       | Y         | Z         |
| 1                | 6                | 0              | -1.276900               | -0.305941 | 0.249975  |
| 2                | 6                | 0              | 0.456550                | 1.327463  | -0.078555 |
| 3                | 1                | 0              | -2.240490               | -0.569314 | -0.189396 |
| 4                | 1                | 0              | 0.892134                | 2.298509  | -0.284543 |
| 5                | 6                | 0              | 1.335514                | 0.184099  | 0.143757  |
| 6                | 1                | 0              | 2.390622                | 0.317957  | 0.361257  |
| 7                | 7                | 0              | 0.975299                | -1.042476 | 0.005198  |
| 8                | 8                | 0              | -0.360005               | -1.247969 | -0.302728 |
| 9                | 6                | 0              | -0.857312               | 1.097820  | -0.076117 |
| 10               | 1                | 0              | -1.596181               | 1.866178  | -0.277784 |
| 11               | 1                | 0              | -1.340254               | -0.452895 | 1.341539  |

**107**

Standard orientation:

| Center<br>Number | Atomic<br>Number | Atomic<br>Type | Coordinates (Angstroms) |           |           |
|------------------|------------------|----------------|-------------------------|-----------|-----------|
|                  |                  |                | X                       | Y         | Z         |
| 1                | 6                | 0              | 0.562522                | 1.265783  | 0.156157  |
| 2                | 1                | 0              | 1.005968                | 2.227845  | 0.375439  |
| 3                | 6                | 0              | -0.863443               | 1.105231  | -0.090170 |
| 4                | 1                | 0              | -1.482720               | 1.959508  | -0.338434 |
| 5                | 6                | 0              | 1.329116                | 0.177993  | 0.003661  |
| 6                | 1                | 0              | 2.413532                | 0.160835  | 0.016060  |
| 7                | 6                | 0              | -1.363290               | -0.134895 | -0.074984 |
| 8                | 1                | 0              | -2.400440               | -0.385267 | -0.268408 |
| 9                | 7                | 0              | -0.511274               | -1.252222 | 0.211763  |
| 10               | 1                | 0              | -0.379249               | -1.339723 | 1.224040  |
| 11               | 8                | 0              | 0.804049                | -1.042789 | -0.307378 |

**200**

Standard orientation:

| Center<br>Number | Atomic<br>Number | Atomic<br>Type | Coordinates (Angstroms) |          |           |
|------------------|------------------|----------------|-------------------------|----------|-----------|
|                  |                  |                | X                       | Y        | Z         |
| 1                | 6                | 0              | 0.937211                | 1.159926 | 0.000441  |
| 2                | 6                | 0              | -0.605050               | 1.335846 | -0.000894 |
| 3                | 1                | 0              | 1.454625                | 1.530248 | -0.887820 |
| 4                | 1                | 0              | 1.452619                | 1.529585 | 0.890174  |
| 5                | 1                | 0              | -1.013160               | 1.821160 | -0.891021 |
| 6                | 1                | 0              | -1.014762               | 1.822603 | 0.887671  |

|    |   |   |           |           |           |
|----|---|---|-----------|-----------|-----------|
| 7  | 6 | 0 | 0.745794  | -0.370097 | 0.000089  |
| 8  | 6 | 0 | -0.776222 | -0.191109 | -0.000064 |
| 9  | 7 | 0 | -1.709593 | -1.038105 | 0.000708  |
| 10 | 1 | 0 | -2.620516 | -0.570166 | 0.000788  |
| 11 | 8 | 0 | 1.487243  | -1.309260 | -0.000273 |

## 201

Standard orientation:

| Center<br>Number | Atomic<br>Number | Atomic<br>Type | Coordinates (Angstroms) |           |           |
|------------------|------------------|----------------|-------------------------|-----------|-----------|
|                  |                  |                | X                       | Y         | Z         |
| 1                | 6                | 0              | 1.030001                | 1.088275  | 0.000225  |
| 2                | 6                | 0              | -0.494353               | 1.399904  | -0.000265 |
| 3                | 1                | 0              | 1.579951                | 1.408921  | -0.888184 |
| 4                | 1                | 0              | 1.579446                | 1.408896  | 0.888960  |
| 5                | 1                | 0              | -0.859828               | 1.918906  | -0.889007 |
| 6                | 1                | 0              | -0.860295               | 1.919376  | 0.887999  |
| 7                | 6                | 0              | 0.700844                | -0.413857 | 0.000116  |
| 8                | 8                | 0              | 1.335525                | -1.431179 | -0.000191 |
| 9                | 6                | 0              | -0.799455               | -0.095850 | 0.000091  |
| 10               | 7                | 0              | -1.871389               | -0.759712 | 0.000099  |
| 11               | 1                | 0              | -1.645972               | -1.759517 | 0.000071  |

## 202

Standard orientation:

| Center<br>Number | Atomic<br>Number | Atomic<br>Type | Coordinates (Angstroms) |  |  |
|------------------|------------------|----------------|-------------------------|--|--|
|------------------|------------------|----------------|-------------------------|--|--|

| Number | Number | Type | X         | Y         | Z         |
|--------|--------|------|-----------|-----------|-----------|
| 1      | 6      | 0    | -0.091167 | 1.349717  | 0.054707  |
| 2      | 6      | 0    | -0.693077 | 0.150622  | 0.023678  |
| 3      | 1      | 0    | -0.405286 | 2.382715  | 0.132791  |
| 4      | 7      | 0    | 1.269338  | 0.900093  | -0.160977 |
| 5      | 1      | 0    | 1.967019  | 1.138565  | 0.541343  |
| 6      | 6      | 0    | -2.066119 | -0.410356 | -0.011658 |
| 7      | 1      | 0    | -2.812555 | 0.373910  | 0.135006  |
| 8      | 1      | 0    | -2.266024 | -0.897441 | -0.971576 |
| 9      | 1      | 0    | -2.198138 | -1.164558 | 0.769850  |
| 10     | 6      | 0    | 0.692968  | -0.438689 | -0.040365 |
| 11     | 8      | 0    | 1.221749  | -1.505201 | 0.045156  |

## 204

Standard orientation:

| Center<br>Number | Atomic<br>Number | Atomic<br>Type | Coordinates (Angstroms) |           |           |
|------------------|------------------|----------------|-------------------------|-----------|-----------|
|                  |                  |                | X                       | Y         | Z         |
| 1                | 6                | 0              | -1.161668               | 1.061042  | -0.000034 |
| 2                | 1                | 0              | -1.728316               | 1.343843  | -0.894125 |
| 3                | 1                | 0              | -1.728420               | 1.343850  | 0.893988  |
| 4                | 6                | 0              | 0.726094                | 0.121765  | 0.000007  |
| 5                | 6                | 0              | 0.327671                | 1.407955  | 0.000052  |
| 6                | 6                | 0              | -0.652035               | -0.396874 | 0.000000  |
| 7                | 7                | 0              | -1.093827               | -1.581644 | 0.000019  |
| 8                | 1                | 0              | -2.114947               | -1.590899 | 0.000017  |
| 9                | 8                | 0              | 1.902757                | -0.510854 | -0.000018 |
| 10               | 1                | 0              | 1.718734                | -1.457622 | -0.000044 |

|    |   |   |          |          |          |
|----|---|---|----------|----------|----------|
| 11 | 1 | 0 | 0.847306 | 2.355850 | 0.000023 |
|----|---|---|----------|----------|----------|

---

## 205

Standard orientation:

---

| Center<br>Number | Atomic<br>Number | Atomic<br>Type | Coordinates (Angstroms) |           |           |
|------------------|------------------|----------------|-------------------------|-----------|-----------|
|                  |                  |                | X                       | Y         | Z         |
| 1                | 6                | 0              | 0.783341                | -1.029991 | 0.021626  |
| 2                | 1                | 0              | 0.816650                | -1.593321 | 0.957524  |
| 3                | 1                | 0              | 0.657898                | -1.706384 | -0.826515 |
| 4                | 6                | 0              | 1.048539                | 0.965817  | 0.009497  |
| 5                | 6                | 0              | -0.081317               | 0.213630  | 0.052391  |
| 6                | 1                | 0              | 1.299207                | 2.021448  | 0.026688  |
| 7                | 7                | 0              | 1.937315                | -0.095203 | -0.141679 |
| 8                | 1                | 0              | 2.758863                | -0.175555 | 0.446226  |
| 9                | 6                | 0              | -1.498716               | 0.471607  | 0.003171  |
| 10               | 1                | 0              | -1.772097               | 1.549456  | -0.002276 |
| 11               | 8                | 0              | -2.354101               | -0.394450 | -0.016250 |

---

## 206

Standard orientation:

---

| Center<br>Number | Atomic<br>Number | Atomic<br>Type | Coordinates (Angstroms) |           |          |
|------------------|------------------|----------------|-------------------------|-----------|----------|
|                  |                  |                | X                       | Y         | Z        |
| 1                | 6                | 0              | -0.728518               | -0.166517 | 0.002355 |
| 2                | 6                | 0              | -1.753900               | -1.006698 | 0.010963 |

---

|    |   |   |           |           |           |
|----|---|---|-----------|-----------|-----------|
| 3  | 1 | 0 | -2.774455 | -0.645704 | 0.019536  |
| 4  | 1 | 0 | -1.570931 | -2.073175 | 0.009809  |
| 5  | 6 | 0 | 0.738156  | -0.188149 | -0.023327 |
| 6  | 6 | 0 | 1.728623  | -1.068406 | 0.008741  |
| 7  | 1 | 0 | 1.510730  | -2.127762 | 0.061796  |
| 8  | 1 | 0 | 2.765320  | -0.754445 | -0.019646 |
| 9  | 7 | 0 | 0.720840  | 1.248265  | -0.117884 |
| 10 | 1 | 0 | 1.052409  | 1.691596  | 0.740418  |
| 11 | 8 | 0 | -0.741890 | 1.218781  | 0.002610  |

---

## 300

Standard orientation:

---

| Center<br>Number | Atomic<br>Number | Atomic<br>Type | Coordinates (Angstroms) |           |           |
|------------------|------------------|----------------|-------------------------|-----------|-----------|
|                  |                  |                | X                       | Y         | Z         |
| 1                | 6                | 0              | 1.893547                | -0.752746 | -0.120184 |
| 2                | 6                | 0              | 1.893447                | 0.752850  | -0.120216 |
| 3                | 6                | 0              | 0.729084                | -0.000016 | 0.460164  |
| 4                | 1                | 0              | 1.724626                | -1.252823 | -1.066941 |
| 5                | 1                | 0              | 2.547471                | -1.277213 | 0.567798  |
| 6                | 1                | 0              | 1.724456                | 1.252866  | -1.066992 |
| 7                | 1                | 0              | 2.547306                | 1.277432  | 0.567740  |
| 8                | 1                | 0              | 0.616228                | -0.000011 | 1.540121  |
| 9                | 7                | 0              | -0.491152               | -0.000151 | -0.266942 |
| 10               | 6                | 0              | -1.673804               | -0.000088 | -0.047970 |
| 11               | 8                | 0              | -2.846958               | 0.000100  | 0.037013  |

---



**301**

Standard orientation:

| Center<br>Number | Atomic<br>Number | Atomic<br>Type | Coordinates (Angstroms) |           |           |
|------------------|------------------|----------------|-------------------------|-----------|-----------|
|                  |                  |                | X                       | Y         | Z         |
| 1                | 6                | 0              | 0.864036                | -1.063583 | 0.605419  |
| 2                | 6                | 0              | 1.150384                | 0.038827  | -0.364598 |
| 3                | 6                | 0              | -0.149086               | -0.724171 | -0.479088 |
| 4                | 1                | 0              | 1.393554                | -2.004989 | 0.511377  |
| 5                | 1                | 0              | 0.596902                | -0.773071 | 1.615670  |
| 6                | 1                | 0              | 1.875489                | -0.157408 | -1.153952 |
| 7                | 1                | 0              | -0.248038               | -1.415821 | -1.309221 |
| 8                | 6                | 0              | -1.380592               | -0.078309 | -0.101919 |
| 9                | 7                | 0              | -2.384123               | 0.417033  | 0.195579  |
| 10               | 8                | 0              | 1.050278                | 1.357524  | 0.042801  |
| 11               | 1                | 0              | 1.760275                | 1.535287  | 0.665786  |

**302**

Standard orientation:

| Center<br>Number | Atomic<br>Number | Atomic<br>Type | Coordinates (Angstroms) |           |           |
|------------------|------------------|----------------|-------------------------|-----------|-----------|
|                  |                  |                | X                       | Y         | Z         |
| 1                | 6                | 0              | 1.135908                | -0.717515 | 0.752785  |
| 2                | 6                | 0              | 1.135854                | -0.717550 | -0.752854 |
| 3                | 6                | 0              | 0.193952                | 0.188063  | 0.000007  |
| 4                | 1                | 0              | 0.725031                | -1.573914 | 1.275420  |
| 5                | 1                | 0              | 1.945878                | -0.201588 | 1.256213  |
| 6                | 1                | 0              | 0.724955                | -1.573985 | -1.275417 |

|    |   |   |           |           |           |
|----|---|---|-----------|-----------|-----------|
| 7  | 1 | 0 | 1.945784  | -0.201634 | -1.256356 |
| 8  | 8 | 0 | 0.493939  | 1.552966  | 0.000156  |
| 9  | 1 | 0 | -0.322225 | 2.058004  | -0.001201 |
| 10 | 6 | 0 | -1.216769 | -0.140417 | 0.000056  |
| 11 | 7 | 0 | -2.352086 | -0.372300 | 0.000019  |

**303**

Standard orientation:

| Center<br>Number | Atomic<br>Number | Atomic<br>Type | Coordinates (Angstroms) |           |           |
|------------------|------------------|----------------|-------------------------|-----------|-----------|
|                  |                  |                | X                       | Y         | Z         |
| 1                | 6                | 0              | 1.098942                | -0.719589 | -0.739764 |
| 2                | 6                | 0              | 1.081966                | -0.701732 | 0.775216  |
| 3                | 6                | 0              | 0.160122                | 0.187207  | -0.015445 |
| 4                | 1                | 0              | 1.925825                | -0.229296 | -1.240314 |
| 5                | 1                | 0              | 0.676416                | -1.578396 | -1.247639 |
| 6                | 1                | 0              | 1.904107                | -0.205683 | 1.279221  |
| 7                | 1                | 0              | 0.648371                | -1.548901 | 1.294277  |
| 8                | 6                | 0              | -2.363061               | -0.382989 | 0.004036  |
| 9                | 7                | 0              | -1.211063               | -0.143324 | -0.014242 |
| 10               | 8                | 0              | 0.413392                | 1.539740  | -0.106657 |
| 11               | 1                | 0              | 0.147776                | 1.950232  | 0.723139  |

**304**

Standard orientation:

| Center<br>Number | Atomic<br>Number | Atomic<br>Type | Coordinates (Angstroms) |   |   |
|------------------|------------------|----------------|-------------------------|---|---|
|                  |                  |                | X                       | Y | Z |

| Number | Number | Type | X         | Y         | Z         |
|--------|--------|------|-----------|-----------|-----------|
| 1      | 6      | 0    | -1.797265 | -0.757440 | -0.004416 |
| 2      | 6      | 0    | -1.796776 | 0.757932  | -0.003331 |
| 3      | 6      | 0    | -0.574645 | 0.000115  | -0.388165 |
| 4      | 1      | 0    | -1.778804 | -1.248820 | 0.961996  |
| 5      | 1      | 0    | -2.331477 | -1.289233 | -0.783861 |
| 6      | 1      | 0    | -1.777982 | 1.247925  | 0.963777  |
| 7      | 1      | 0    | -2.330651 | 1.291191  | -0.782004 |
| 8      | 1      | 0    | -0.209521 | 0.000739  | -1.408758 |
| 9      | 8      | 0    | 0.485347  | -0.001013 | 0.583599  |
| 10     | 6      | 0    | 1.683858  | -0.000161 | 0.114071  |
| 11     | 7      | 0    | 2.779232  | 0.000517  | -0.275556 |

**305**

Standard orientation:

| Center<br>Number | Atomic<br>Number | Atomic<br>Type | Coordinates (Angstroms) |           |           |
|------------------|------------------|----------------|-------------------------|-----------|-----------|
|                  |                  |                | X                       | Y         | Z         |
| 1                | 6                | 0              | 1.929586                | -0.356449 | -0.156064 |
| 2                | 6                | 0              | 1.256670                | 0.997348  | -0.138511 |
| 3                | 6                | 0              | 0.611180                | -0.180807 | 0.510780  |
| 4                | 1                | 0              | 1.930675                | -0.895874 | -1.096535 |
| 5                | 1                | 0              | 2.793291                | -0.528952 | 0.475872  |
| 6                | 1                | 0              | 0.816509                | 1.345081  | -1.066672 |
| 7                | 1                | 0              | 1.649193                | 1.775907  | 0.505597  |
| 8                | 8                | 0              | -0.469518               | -0.803237 | -0.180204 |
| 9                | 1                | 0              | 0.509495                | -0.241040 | 1.589648  |
| 10               | 7                | 0              | -1.581378               | -0.093978 | -0.051595 |

11 6 0 -2.609666 0.478011 0.016277

**306**

Standard orientation:

| Center<br>Number | Atomic<br>Number | Atomic<br>Type | Coordinates (Angstroms) |           |           |
|------------------|------------------|----------------|-------------------------|-----------|-----------|
|                  |                  |                | X                       | Y         | Z         |
| 1                | 6                | 0              | 1.891876                | -0.753921 | -0.121951 |
| 2                | 6                | 0              | 1.894466                | 0.751566  | -0.121516 |
| 3                | 6                | 0              | 0.730045                | 0.000716  | 0.461641  |
| 4                | 1                | 0              | 1.719866                | -1.254562 | -1.067824 |
| 5                | 1                | 0              | 2.546832                | -1.278729 | 0.564783  |
| 6                | 1                | 0              | 1.724175                | 1.253362  | -1.067103 |
| 7                | 1                | 0              | 2.551230                | 1.273741  | 0.565489  |
| 8                | 1                | 0              | 0.620298                | 0.000602  | 1.541885  |
| 9                | 6                | 0              | -1.674070               | 0.000239  | -0.047218 |
| 10               | 8                | 0              | -2.847384               | -0.001304 | 0.034982  |
| 11               | 7                | 0              | -0.491033               | 0.003488  | -0.263260 |

**307**

Standard orientation:

| Center<br>Number | Atomic<br>Number | Atomic<br>Type | Coordinates (Angstroms) |           |          |
|------------------|------------------|----------------|-------------------------|-----------|----------|
|                  |                  |                | X                       | Y         | Z        |
| 1                | 6                | 0              | -0.704740               | -0.071723 | 0.528643 |
| 2                | 1                | 0              | -0.856555               | -0.059506 | 1.613075 |

|    |   |   |           |           |           |
|----|---|---|-----------|-----------|-----------|
| 3  | 6 | 0 | -1.960455 | -0.306031 | -0.292168 |
| 4  | 1 | 0 | -2.387624 | -1.283891 | -0.058325 |
| 5  | 1 | 0 | -2.706120 | 0.463659  | -0.080167 |
| 6  | 1 | 0 | -1.734984 | -0.280953 | -1.361507 |
| 7  | 6 | 0 | 0.426019  | 0.831950  | 0.087332  |
| 8  | 6 | 0 | 0.648699  | -0.618946 | 0.120554  |
| 9  | 8 | 0 | 0.784667  | 1.942729  | -0.180310 |
| 10 | 7 | 0 | 1.249993  | -1.699270 | -0.126710 |
| 11 | 1 | 0 | 2.200858  | -1.497747 | -0.449800 |

**308**

Standard orientation:

| Center<br>Number | Atomic<br>Number | Atomic<br>Type | Coordinates (Angstroms) |           |           |
|------------------|------------------|----------------|-------------------------|-----------|-----------|
|                  |                  |                | X                       | Y         | Z         |
| 1                | 6                | 0              | -0.908635               | 1.257462  | -0.158224 |
| 2                | 6                | 0              | 0.175321                | 0.291656  | 0.464978  |
| 3                | 1                | 0              | -1.357765               | 1.989125  | 0.504733  |
| 4                | 1                | 0              | -0.681216               | 1.583625  | -1.167402 |
| 5                | 1                | 0              | 0.386732                | 0.399856  | 1.529736  |
| 6                | 6                | 0              | -1.188268               | -0.171208 | 0.041790  |
| 7                | 8                | 0              | -1.950883               | -1.103730 | -0.058035 |
| 8                | 7                | 0              | 1.236374                | -0.054469 | -0.440284 |
| 9                | 6                | 0              | 2.386084                | -0.345047 | 0.026377  |
| 10               | 1                | 0              | 2.636660                | -0.344769 | 1.093062  |
| 11               | 1                | 0              | 3.181020                | -0.613881 | -0.663387 |

**309**

Standard orientation:

| Center<br>Number | Atomic<br>Number | Atomic<br>Type | Coordinates (Angstroms) |           |           |
|------------------|------------------|----------------|-------------------------|-----------|-----------|
|                  |                  |                | X                       | Y         | Z         |
| 1                | 6                | 0              | 0.692403                | 0.097676  | 0.534478  |
| 2                | 1                | 0              | 0.835439                | 0.103715  | 1.619846  |
| 3                | 6                | 0              | -0.409555               | -0.841897 | 0.079178  |
| 4                | 6                | 0              | -0.687202               | 0.587580  | 0.095348  |
| 5                | 6                | 0              | 1.947720                | 0.353677  | -0.281278 |
| 6                | 1                | 0              | 2.364448                | 1.338420  | -0.054261 |
| 7                | 1                | 0              | 2.704506                | -0.402026 | -0.058412 |
| 8                | 1                | 0              | 1.731129                | 0.312448  | -1.352148 |
| 9                | 8                | 0              | -0.713499               | -1.972016 | -0.173083 |
| 10               | 7                | 0              | -1.457883               | 1.543552  | -0.188365 |
| 11               | 1                | 0              | -0.982548               | 2.436494  | -0.018159 |

**310**

Standard orientation:

| Center<br>Number | Atomic<br>Number | Atomic<br>Type | Coordinates (Angstroms) |           |           |
|------------------|------------------|----------------|-------------------------|-----------|-----------|
|                  |                  |                | X                       | Y         | Z         |
| 1                | 6                | 0              | -0.189216               | 0.502325  | -0.001716 |
| 2                | 6                | 0              | 1.029218                | 1.353735  | 0.000396  |
| 3                | 6                | 0              | 1.065698                | -0.154728 | 0.001218  |
| 4                | 1                | 0              | 1.292763                | 1.880751  | 0.916771  |
| 5                | 1                | 0              | 1.297796                | 1.878877  | -0.915596 |
| 6                | 6                | 0              | 1.789303                | -1.261898 | -0.000231 |

|    |   |   |           |           |           |
|----|---|---|-----------|-----------|-----------|
| 7  | 1 | 0 | 1.308488  | -2.234314 | -0.002532 |
| 8  | 1 | 0 | 2.873991  | -1.226649 | 0.001297  |
| 9  | 8 | 0 | -1.978990 | -0.758375 | 0.000656  |
| 10 | 1 | 0 | -2.927388 | -0.595013 | 0.000863  |
| 11 | 7 | 0 | -1.454821 | 0.532392  | -0.000579 |

**400**

Standard orientation:

| Center<br>Number | Atomic<br>Number | Atomic<br>Type | Coordinates (Angstroms) |           |           |
|------------------|------------------|----------------|-------------------------|-----------|-----------|
|                  |                  |                | X                       | Y         | Z         |
| 1                | 6                | 0              | 0.697103                | -0.071068 | 0.000158  |
| 2                | 6                | 0              | -0.602129               | -0.478360 | -0.000255 |
| 3                | 6                | 0              | -0.294058               | 0.934736  | -0.000213 |
| 4                | 8                | 0              | -0.670213               | 2.087095  | 0.000162  |
| 5                | 6                | 0              | 2.125260                | -0.478324 | 0.000222  |
| 6                | 1                | 0              | 2.234585                | -1.564439 | 0.048935  |
| 7                | 1                | 0              | 2.622371                | -0.118443 | -0.905290 |
| 8                | 1                | 0              | 2.644402                | -0.036930 | 0.855604  |
| 9                | 7                | 0              | -1.448412               | -1.514382 | -0.000467 |
| 10               | 1                | 0              | -2.439874               | -1.353672 | 0.002214  |
| 11               | 1                | 0              | -1.117948               | -2.464511 | 0.001041  |

**401**

Standard orientation:

| Center<br>Number | Atomic<br>Number | Atomic<br>Type | Coordinates (Angstroms) |  |  |
|------------------|------------------|----------------|-------------------------|--|--|
|------------------|------------------|----------------|-------------------------|--|--|

| Number | Number | Type | X         | Y         | Z         |
|--------|--------|------|-----------|-----------|-----------|
| 1      | 6      | 0    | 0.854680  | -0.111110 | -0.000072 |
| 2      | 8      | 0    | 1.840150  | -0.828251 | 0.000046  |
| 3      | 6      | 0    | -0.536905 | -0.690668 | -0.000250 |
| 4      | 6      | 0    | -1.696315 | 0.030714  | 0.645478  |
| 5      | 6      | 0    | -1.696391 | 0.031160  | -0.645299 |
| 6      | 1      | 0    | -0.500956 | -1.780143 | -0.000602 |
| 7      | 7      | 0    | 0.937001  | 1.251246  | -0.000224 |
| 8      | 1      | 0    | 1.852139  | 1.668157  | 0.001085  |
| 9      | 1      | 0    | 0.122653  | 1.839514  | 0.000996  |
| 10     | 1      | 0    | -2.152007 | 0.288963  | 1.586868  |
| 11     | 1      | 0    | -2.152447 | 0.290220  | -1.586293 |

**402**

Standard orientation:

| Center<br>Number | Atomic<br>Number | Atomic<br>Type | Coordinates (Angstroms) |           |           |
|------------------|------------------|----------------|-------------------------|-----------|-----------|
|                  |                  |                | X                       | Y         | Z         |
| 1                | 6                | 0              | -1.598685               | 0.877387  | -0.019883 |
| 2                | 6                | 0              | -1.927019               | -0.594685 | 0.017138  |
| 3                | 6                | 0              | -0.583983               | 0.069462  | 0.001984  |
| 4                | 1                | 0              | -2.293897               | -1.084774 | -0.885916 |
| 5                | 1                | 0              | -2.295282               | -1.039521 | 0.942798  |
| 6                | 1                | 0              | -1.999203               | 1.877839  | -0.053982 |
| 7                | 6                | 0              | 0.873967                | -0.172871 | -0.000750 |
| 8                | 8                | 0              | 1.350541                | -1.292085 | -0.013242 |
| 9                | 7                | 0              | 1.623831                | 0.964953  | 0.006329  |
| 10               | 1                | 0              | 1.205495                | 1.877574  | 0.045556  |

|    |   |   |          |          |          |
|----|---|---|----------|----------|----------|
| 11 | 1 | 0 | 2.626061 | 0.875135 | 0.022237 |
|----|---|---|----------|----------|----------|

---

#### 403

Standard orientation:

---

| Center<br>Number | Atomic<br>Number | Atomic<br>Type | Coordinates (Angstroms) |           |           |
|------------------|------------------|----------------|-------------------------|-----------|-----------|
|                  |                  |                | X                       | Y         | Z         |
| 1                | 6                | 0              | 1.395827                | -0.109857 | -0.361379 |
| 2                | 8                | 0              | 2.469364                | -0.466385 | 0.065569  |
| 3                | 1                | 0              | 1.178373                | -0.090432 | -1.455373 |
| 4                | 6                | 0              | 0.260159                | 0.351062  | 0.486136  |
| 5                | 6                | 0              | -0.754646               | 1.323753  | -0.112690 |
| 6                | 6                | 0              | -1.144798               | 0.097367  | 0.022578  |
| 7                | 1                | 0              | 0.489674                | 0.358243  | 1.556317  |
| 8                | 1                | 0              | -0.913198               | 2.357121  | -0.358474 |
| 9                | 7                | 0              | -2.028640               | -0.920647 | -0.102338 |
| 10               | 1                | 0              | -1.846976               | -1.745671 | 0.445449  |
| 11               | 1                | 0              | -3.001562               | -0.677599 | -0.203976 |

---

#### 404

Standard orientation:

---

| Center<br>Number | Atomic<br>Number | Atomic<br>Type | Coordinates (Angstroms) |          |           |
|------------------|------------------|----------------|-------------------------|----------|-----------|
|                  |                  |                | X                       | Y        | Z         |
| 1                | 6                | 0              | -1.704864               | 0.011376 | -0.643958 |
| 2                | 6                | 0              | -1.704916               | 0.011382 | 0.643912  |

---

|    |   |   |           |           |           |
|----|---|---|-----------|-----------|-----------|
| 3  | 6 | 0 | -0.532920 | -0.685477 | 0.000028  |
| 4  | 1 | 0 | -0.489146 | -1.777598 | 0.000058  |
| 5  | 1 | 0 | -2.141364 | 0.291292  | -1.587320 |
| 6  | 1 | 0 | -2.141483 | 0.291316  | 1.587238  |
| 7  | 6 | 0 | 0.826129  | -0.064375 | 0.000078  |
| 8  | 7 | 0 | 1.949640  | -0.658169 | -0.000025 |
| 9  | 1 | 0 | 1.819965  | -1.667794 | -0.000096 |
| 10 | 8 | 0 | 0.786676  | 1.283226  | -0.000015 |
| 11 | 1 | 0 | 1.710563  | 1.566727  | 0.000059  |

---

#### 405

Standard orientation:

---

| Center<br>Number | Atomic<br>Number | Atomic<br>Type | Coordinates (Angstroms) |           |           |
|------------------|------------------|----------------|-------------------------|-----------|-----------|
|                  |                  |                | X                       | Y         | Z         |
| 1                | 6                | 0              | 1.616204                | -0.865397 | -0.000079 |
| 2                | 6                | 0              | 0.578569                | -0.092723 | 0.000145  |
| 3                | 6                | 0              | 1.904517                | 0.616186  | 0.000014  |
| 4                | 1                | 0              | 2.263459                | 1.092429  | -0.914765 |
| 5                | 1                | 0              | 2.263810                | 1.092308  | 0.914711  |
| 6                | 1                | 0              | 2.041460                | -1.854909 | -0.000257 |
| 7                | 6                | 0              | -0.864658               | 0.098495  | 0.000041  |
| 8                | 7                | 0              | -1.477931               | 1.211652  | -0.000072 |
| 9                | 1                | 0              | -0.810203               | 1.979388  | 0.000004  |
| 10               | 8                | 0              | -1.542732               | -1.063483 | 0.000016  |
| 11               | 1                | 0              | -2.478950               | -0.822281 | -0.000039 |

---

406

Standard orientation:

| Center<br>Number | Atomic<br>Number | Atomic<br>Type | Coordinates (Angstroms) |           |           |
|------------------|------------------|----------------|-------------------------|-----------|-----------|
|                  |                  |                | X                       | Y         | Z         |
| 1                | 6                | 0              | 1.671219                | 0.812672  | -0.000494 |
| 2                | 6                | 0              | 0.583568                | 0.107283  | 0.000178  |
| 3                | 6                | 0              | 1.860031                | -0.683642 | 0.000375  |
| 4                | 1                | 0              | 2.181296                | -1.183850 | 0.915439  |
| 5                | 1                | 0              | 2.181068                | -1.184961 | -0.914162 |
| 6                | 1                | 0              | 2.160867                | 1.772740  | -0.001448 |
| 7                | 6                | 0              | -0.875283               | 0.068177  | 0.000057  |
| 8                | 7                | 0              | -1.667211               | 1.063051  | 0.000278  |
| 9                | 1                | 0              | -1.144855               | 1.935945  | 0.000609  |
| 10               | 8                | 0              | -1.353551               | -1.188037 | -0.000340 |
| 11               | 1                | 0              | -2.316704               | -1.103875 | -0.000363 |

407

Standard orientation:

| Center<br>Number | Atomic<br>Number | Atomic<br>Type | Coordinates (Angstroms) |           |           |
|------------------|------------------|----------------|-------------------------|-----------|-----------|
|                  |                  |                | X                       | Y         | Z         |
| 1                | 6                | 0              | -1.709333               | 0.022208  | -0.644268 |
| 2                | 6                | 0              | -1.709331               | 0.022218  | 0.644265  |
| 3                | 6                | 0              | -0.545550               | -0.688931 | 0.000004  |
| 4                | 1                | 0              | -0.494251               | -1.777315 | 0.000015  |
| 5                | 1                | 0              | -2.151744               | 0.299031  | -1.586052 |
| 6                | 1                | 0              | -2.151740               | 0.299055  | 1.586046  |

|    |   |   |          |           |           |
|----|---|---|----------|-----------|-----------|
| 7  | 6 | 0 | 0.820951 | -0.090160 | 0.000004  |
| 8  | 7 | 0 | 1.848543 | -0.837022 | 0.000000  |
| 9  | 1 | 0 | 2.719884 | -0.303944 | -0.000008 |
| 10 | 8 | 0 | 0.788345 | 1.268319  | -0.000003 |
| 11 | 1 | 0 | 1.690870 | 1.603767  | -0.000005 |

408

Standard orientation:

| Center<br>Number | Atomic<br>Number | Atomic<br>Type | Coordinates (Angstroms) |           |           |
|------------------|------------------|----------------|-------------------------|-----------|-----------|
|                  |                  |                | X                       | Y         | Z         |
| 1                | 6                | 0              | -1.628974               | 0.837043  | 0.000133  |
| 2                | 6                | 0              | -0.591918               | 0.061214  | -0.000088 |
| 3                | 6                | 0              | -1.912107               | -0.645364 | -0.000099 |
| 4                | 1                | 0              | -2.262875               | -1.127203 | -0.914544 |
| 5                | 1                | 0              | -2.262610               | -1.127857 | 0.914093  |
| 6                | 1                | 0              | -2.048793               | 1.829209  | 0.000725  |
| 7                | 6                | 0              | 0.851515                | -0.108279 | 0.000048  |
| 8                | 7                | 0              | 1.365628                | -1.270696 | 0.000116  |
| 9                | 1                | 0              | 2.386740                | -1.239255 | 0.000004  |
| 10               | 8                | 0              | 1.484914                | 1.092757  | -0.000166 |
| 11               | 1                | 0              | 2.437744                | 0.950234  | 0.000278  |

409

Standard orientation:

| Center | Atomic | Atomic | Coordinates (Angstroms) |   |   |
|--------|--------|--------|-------------------------|---|---|
| Number | Number | Type   | X                       | Y | Z |

| Number | Number | Type | X         | Y         | Z         |
|--------|--------|------|-----------|-----------|-----------|
| 1      | 6      | 0    | 1.675941  | 0.831660  | -0.000778 |
| 2      | 6      | 0    | 0.590877  | 0.126687  | 0.000288  |
| 3      | 6      | 0    | 1.867324  | -0.665036 | 0.000601  |
| 4      | 1      | 0    | 2.191452  | -1.166078 | 0.915022  |
| 5      | 1      | 0    | 2.191048  | -1.167976 | -0.912928 |
| 6      | 1      | 0    | 2.154669  | 1.796518  | -0.002429 |
| 7      | 6      | 0    | -0.865089 | 0.082488  | 0.000115  |
| 8      | 7      | 0    | -1.546163 | 1.155624  | 0.000563  |
| 9      | 1      | 0    | -2.551534 | 0.974903  | 0.000270  |
| 10     | 8      | 0    | -1.312595 | -1.197973 | -0.000542 |
| 11     | 1      | 0    | -2.276049 | -1.197743 | -0.000894 |

**410**

Standard orientation:

| Center<br>Number | Atomic<br>Number | Atomic<br>Type | Coordinates (Angstroms) |           |           |
|------------------|------------------|----------------|-------------------------|-----------|-----------|
|                  |                  |                | X                       | Y         | Z         |
| 1                | 6                | 0              | 0.638728                | -1.183382 | 0.642563  |
| 2                | 6                | 0              | 0.639388                | -1.183369 | -0.642399 |
| 3                | 6                | 0              | 0.365773                | 0.154430  | -0.000145 |
| 4                | 1                | 0              | 0.735217                | -1.677499 | 1.593779  |
| 5                | 1                | 0              | 0.736579                | -1.677733 | -1.593430 |
| 6                | 7                | 0              | 1.397883                | 1.162763  | 0.000304  |
| 7                | 1                | 0              | 1.334045                | 1.757509  | -0.819202 |
| 8                | 1                | 0              | 1.332358                | 1.758548  | 0.818919  |
| 9                | 6                | 0              | -1.059986               | 0.639494  | -0.000277 |
| 10               | 1                | 0              | -1.165444               | 1.749891  | -0.000140 |

11 8 0 -2.032670 -0.076637 -0.000062

**411**

Standard orientation:

| Center<br>Number | Atomic<br>Number | Atomic<br>Type | Coordinates (Angstroms) |           |           |
|------------------|------------------|----------------|-------------------------|-----------|-----------|
|                  |                  |                | X                       | Y         | Z         |
| 1                | 6                | 0              | -2.132155               | -0.589141 | 0.000307  |
| 2                | 6                | 0              | -0.873956               | -0.293090 | 0.000197  |
| 3                | 6                | 0              | -1.805507               | 0.894656  | -0.000245 |
| 4                | 1                | 0              | -1.950296               | 1.478340  | -0.914600 |
| 5                | 1                | 0              | -2.932329               | -1.309363 | -0.000376 |
| 6                | 1                | 0              | -1.950028               | 1.478870  | 0.913805  |
| 7                | 7                | 0              | 0.438764                | -0.700691 | -0.000212 |
| 8                | 6                | 0              | 1.289925                | 0.242409  | 0.000192  |
| 9                | 1                | 0              | 1.021765                | 1.306620  | 0.000960  |
| 10               | 8                | 0              | 2.595585                | -0.043714 | -0.000176 |
| 11               | 1                | 0              | 3.105024                | 0.771088  | 0.000402  |

**412**

Standard orientation:

| Center<br>Number | Atomic<br>Number | Atomic<br>Type | Coordinates (Angstroms) |           |           |
|------------------|------------------|----------------|-------------------------|-----------|-----------|
|                  |                  |                | X                       | Y         | Z         |
| 1                | 6                | 0              | -1.932075               | -0.348251 | -0.436516 |
| 2                | 6                | 0              | -0.728497               | -0.368437 | 0.040781  |

|    |   |   |           |           |           |
|----|---|---|-----------|-----------|-----------|
| 3  | 6 | 0 | -1.519957 | 0.873044  | 0.358862  |
| 4  | 1 | 0 | -1.293629 | 1.813742  | -0.151319 |
| 5  | 1 | 0 | -2.704376 | -0.780560 | -1.049859 |
| 6  | 1 | 0 | -1.904679 | 1.010591  | 1.373246  |
| 7  | 7 | 0 | 0.453300  | -1.042534 | 0.236588  |
| 8  | 6 | 0 | 1.554894  | -0.432647 | 0.114426  |
| 9  | 1 | 0 | 2.485208  | -0.959306 | 0.329522  |
| 10 | 8 | 0 | 1.674636  | 0.845986  | -0.291011 |
| 11 | 1 | 0 | 2.601100  | 1.103131  | -0.294934 |

**413**

Standard orientation:

| Center<br>Number | Atomic<br>Number | Atomic<br>Type | Coordinates (Angstroms) |           |           |
|------------------|------------------|----------------|-------------------------|-----------|-----------|
|                  |                  |                | X                       | Y         | Z         |
| 1                | 6                | 0              | 1.810944                | 0.851238  | -0.126670 |
| 2                | 6                | 0              | 0.861217                | -0.033592 | -0.117592 |
| 3                | 6                | 0              | 2.215437                | -0.566041 | 0.235391  |
| 4                | 1                | 0              | 2.768280                | -1.174709 | -0.485683 |
| 5                | 1                | 0              | 2.173504                | 1.838983  | -0.355942 |
| 6                | 1                | 0              | 2.434744                | -0.820079 | 1.276344  |
| 7                | 7                | 0              | -0.427585               | -0.423045 | -0.375726 |
| 8                | 6                | 0              | -1.362779               | 0.195131  | 0.209306  |
| 9                | 1                | 0              | -1.204544               | 0.991201  | 0.947753  |
| 10               | 8                | 0              | -2.638288               | -0.120673 | -0.055930 |
| 11               | 1                | 0              | -3.221497               | 0.410880  | 0.492448  |

**414**

Standard orientation:

| Center<br>Number | Atomic<br>Number | Atomic<br>Type | Coordinates (Angstroms) |           |           |
|------------------|------------------|----------------|-------------------------|-----------|-----------|
|                  |                  |                | X                       | Y         | Z         |
| 1                | 6                | 0              | -0.233153               | -0.748741 | 0.008034  |
| 2                | 6                | 0              | 0.748175                | 0.139254  | -0.000638 |
| 3                | 7                | 0              | 2.064824                | 0.479103  | -0.076897 |
| 4                | 1                | 0              | 2.290759                | 1.399558  | 0.266324  |
| 5                | 1                | 0              | 2.721081                | -0.233480 | 0.203148  |
| 6                | 8                | 0              | -0.572061               | -2.043843 | 0.001936  |
| 7                | 1                | 0              | -1.532363               | -2.099322 | -0.003371 |
| 8                | 6                | 0              | -0.616407               | 0.624268  | 0.000930  |
| 9                | 6                | 0              | -1.501616               | 1.626114  | 0.001786  |
| 10               | 1                | 0              | -1.172606               | 2.657516  | -0.017429 |
| 11               | 1                | 0              | -2.566143               | 1.427374  | 0.013454  |

**415**

Standard orientation:

| Center<br>Number | Atomic<br>Number | Atomic<br>Type | Coordinates (Angstroms) |          |           |
|------------------|------------------|----------------|-------------------------|----------|-----------|
|                  |                  |                | X                       | Y        | Z         |
| 1                | 6                | 0              | 1.056952                | 1.305516 | -0.000226 |
| 2                | 6                | 0              | -0.035398               | 0.541778 | 0.000031  |
| 3                | 1                | 0              | 1.449040                | 2.312737 | -0.000411 |
| 4                | 6                | 0              | -1.514197               | 0.471326 | 0.000316  |
| 5                | 1                | 0              | -1.884051               | 1.011141 | 0.886215  |
| 6                | 1                | 0              | -1.884517               | 1.012138 | -0.884776 |



|    |   |   |           |           |           |
|----|---|---|-----------|-----------|-----------|
| 7  | 8 | 0 | -1.900951 | -0.881631 | -0.000327 |
| 8  | 1 | 0 | -2.860560 | -0.919015 | -0.000145 |
| 9  | 6 | 0 | 1.251343  | -0.108551 | 0.000014  |
| 10 | 7 | 0 | 2.046792  | -1.094732 | 0.000087  |
| 11 | 1 | 0 | 1.507945  | -1.961240 | 0.000310  |

**416**

Standard orientation:

| Center<br>Number | Atomic<br>Number | Atomic<br>Type | Coordinates (Angstroms) |           |           |
|------------------|------------------|----------------|-------------------------|-----------|-----------|
|                  |                  |                | X                       | Y         | Z         |
| 1                | 6                | 0              | 0.485094                | 1.186485  | -0.000013 |
| 2                | 6                | 0              | -0.065320               | -0.030260 | 0.000023  |
| 3                | 1                | 0              | 0.357423                | 2.258256  | 0.000064  |
| 4                | 8                | 0              | -1.163380               | -0.754302 | 0.000004  |
| 5                | 6                | 0              | -2.369145               | 0.016710  | -0.000009 |
| 6                | 1                | 0              | -2.418934               | 0.644274  | -0.894842 |
| 7                | 1                | 0              | -3.188144               | -0.700314 | -0.000323 |
| 8                | 1                | 0              | -2.419264               | 0.643801  | 0.895142  |
| 9                | 6                | 0              | 1.368388                | 0.046530  | -0.000019 |
| 10               | 7                | 0              | 2.558495                | -0.388610 | 0.000005  |
| 11               | 1                | 0              | 2.552391                | -1.408129 | -0.000004 |

**417**

Standard orientation:

| Center<br>Number | Atomic<br>Number | Atomic<br>Type | Coordinates (Angstroms) |  |  |
|------------------|------------------|----------------|-------------------------|--|--|
|------------------|------------------|----------------|-------------------------|--|--|

| Number | Number | Type | X         | Y         | Z         |
|--------|--------|------|-----------|-----------|-----------|
| 1      | 6      | 0    | 1.035136  | 1.305043  | -0.000889 |
| 2      | 6      | 0    | -0.039412 | 0.515455  | 0.000144  |
| 3      | 1      | 0    | 1.399285  | 2.323073  | -0.001674 |
| 4      | 6      | 0    | -1.520156 | 0.453910  | 0.001216  |
| 5      | 1      | 0    | -1.877718 | 1.002189  | 0.887623  |
| 6      | 1      | 0    | -1.879347 | 1.006025  | -0.882133 |
| 7      | 8      | 0    | -1.932565 | -0.887388 | -0.001278 |
| 8      | 1      | 0    | -2.892653 | -0.905206 | -0.000312 |
| 9      | 6      | 0    | 1.248232  | -0.115221 | 0.000044  |
| 10     | 7      | 0    | 1.921542  | -1.188207 | 0.000537  |
| 11     | 1      | 0    | 2.917361  | -0.964646 | -0.000122 |

**418**

Standard orientation:

| Center<br>Number | Atomic<br>Number | Atomic<br>Type | Coordinates (Angstroms) |           |           |
|------------------|------------------|----------------|-------------------------|-----------|-----------|
|                  |                  |                | X                       | Y         | Z         |
| 1                | 6                | 0              | 1.995401                | -0.100655 | 0.644214  |
| 2                | 6                | 0              | 1.995347                | -0.100783 | -0.644256 |
| 3                | 6                | 0              | 0.644745                | -0.344907 | 0.000061  |
| 4                | 1                | 0              | 0.226153                | -1.348783 | 0.000175  |
| 5                | 1                | 0              | 2.510201                | -0.011734 | 1.586200  |
| 6                | 1                | 0              | 2.510070                | -0.012054 | -1.586302 |
| 7                | 6                | 0              | -0.361658               | 0.743289  | 0.000019  |
| 8                | 1                | 0              | 0.002835                | 1.770176  | -0.000222 |
| 9                | 7                | 0              | -1.633910               | 0.644494  | -0.000044 |
| 10               | 8                | 0              | -2.055348               | -0.686698 | 0.000036  |

|    |   |   |           |           |           |
|----|---|---|-----------|-----------|-----------|
| 11 | 1 | 0 | -3.012118 | -0.597136 | -0.000060 |
|----|---|---|-----------|-----------|-----------|

---

**419**

Standard orientation:

| Center<br>Number | Atomic<br>Number | Atomic<br>Type | Coordinates (Angstroms) |           |           |
|------------------|------------------|----------------|-------------------------|-----------|-----------|
|                  |                  |                | X                       | Y         | Z         |
| 1                | 6                | 0              | -1.906664               | 0.657980  | 0.071442  |
| 2                | 6                | 0              | -1.899060               | -0.633748 | 0.087401  |
| 3                | 6                | 0              | -0.646737               | 0.012339  | -0.446793 |
| 4                | 1                | 0              | -2.415460               | 1.592062  | 0.242367  |
| 5                | 1                | 0              | -2.395269               | -1.570059 | 0.280999  |
| 6                | 1                | 0              | -0.436095               | -0.000771 | -1.518365 |
| 7                | 6                | 0              | 0.601778                | 0.027487  | 0.374267  |
| 8                | 1                | 0              | 0.444236                | 0.069889  | 1.456991  |
| 9                | 8                | 0              | 1.661613                | -0.780155 | -0.040967 |
| 10               | 7                | 0              | 1.751028                | 0.686211  | -0.178959 |
| 11               | 1                | 0              | 2.356579                | 0.962296  | 0.600558  |

---

**420**

Standard orientation:

| Center<br>Number | Atomic<br>Number | Atomic<br>Type | Coordinates (Angstroms) |           |           |
|------------------|------------------|----------------|-------------------------|-----------|-----------|
|                  |                  |                | X                       | Y         | Z         |
| 1                | 6                | 0              | 1.871493                | 0.653020  | -0.076377 |
| 2                | 6                | 0              | 1.848901                | -0.641050 | -0.047826 |

---

|    |   |   |           |           |           |
|----|---|---|-----------|-----------|-----------|
| 3  | 6 | 0 | 0.599751  | 0.034937  | 0.398394  |
| 4  | 1 | 0 | 2.384151  | 1.576417  | -0.288935 |
| 5  | 1 | 0 | 2.328676  | -1.590877 | -0.213017 |
| 6  | 1 | 0 | 0.308469  | 0.046254  | 1.454956  |
| 7  | 8 | 0 | -1.605890 | -0.794323 | 0.052364  |
| 8  | 7 | 0 | -0.529914 | 0.050686  | -0.522625 |
| 9  | 6 | 0 | -1.715854 | 0.595404  | 0.045507  |
| 10 | 1 | 0 | -2.431389 | 1.028739  | -0.652979 |
| 11 | 1 | 0 | -1.659129 | 1.085377  | 1.021250  |

---

**500**

Standard orientation:

| Center<br>Number | Atomic<br>Number | Atomic<br>Type | Coordinates (Angstroms) |           |           |
|------------------|------------------|----------------|-------------------------|-----------|-----------|
|                  |                  |                | X                       | Y         | Z         |
| 1                | 6                | 0              | -0.200756               | 1.224894  | 0.437886  |
| 2                | 6                | 0              | 1.118156                | 1.070074  | -0.288862 |
| 3                | 6                | 0              | 0.502221                | -0.283213 | -0.239742 |
| 4                | 1                | 0              | 2.024665                | 1.193012  | 0.314806  |
| 5                | 1                | 0              | 1.228996                | 1.551963  | -1.262769 |
| 6                | 1                | 0              | -0.367637               | 1.742344  | 1.376308  |
| 7                | 6                | 0              | -0.905399               | 0.117560  | -0.115801 |
| 8                | 8                | 0              | -1.990323               | -0.433992 | -0.122081 |
| 9                | 7                | 0              | 1.065829                | -1.445296 | 0.133718  |
| 10               | 1                | 0              | 0.458189                | -2.189127 | 0.439901  |
| 11               | 1                | 0              | 2.032244                | -1.485067 | 0.411490  |

---

**501**

Standard orientation:

| Center<br>Number | Atomic<br>Number | Atomic<br>Type | Coordinates (Angstroms) |           |           |
|------------------|------------------|----------------|-------------------------|-----------|-----------|
|                  |                  |                | X                       | Y         | Z         |
| 1                | 6                | 0              | 1.092480                | -0.081940 | -0.068394 |
| 2                | 6                | 0              | -0.345580               | 0.059555  | -0.041972 |
| 3                | 6                | 0              | -1.626639               | -0.174267 | -0.739542 |
| 4                | 6                | 0              | -1.515481               | -0.341912 | 0.774463  |
| 5                | 1                | 0              | -1.718046               | -1.063448 | -1.354377 |
| 6                | 1                | 0              | -2.158414               | 0.699186  | -1.103501 |
| 7                | 7                | 0              | 0.601040                | 1.211848  | -0.043698 |
| 8                | 1                | 0              | 0.728119                | 1.782444  | 0.788571  |
| 9                | 8                | 0              | 2.103516                | -0.718291 | -0.019449 |
| 10               | 1                | 0              | -1.531417               | -1.343246 | 1.192889  |
| 11               | 1                | 0              | -1.984330               | 0.419844  | 1.390562  |

**502**

Standard orientation:

| Center<br>Number | Atomic<br>Number | Atomic<br>Type | Coordinates (Angstroms) |           |          |
|------------------|------------------|----------------|-------------------------|-----------|----------|
|                  |                  |                | X                       | Y         | Z        |
| 1                | 6                | 0              | -1.578770               | -0.386175 | 0.657041 |
| 2                | 1                | 0              | -1.619175               | -1.394538 | 1.057006 |
| 3                | 1                | 0              | -2.172716               | 0.355616  | 1.186200 |
| 4                | 6                | 0              | -0.346608               | 0.082256  | 0.002617 |
| 5                | 6                | 0              | 0.569804                | 1.306405  | 0.102830 |
| 6                | 6                | 0              | 1.087247                | -0.104095 | 0.001082 |

|    |   |   |           |           |           |
|----|---|---|-----------|-----------|-----------|
| 7  | 1 | 0 | 0.632285  | 1.847925  | 1.045486  |
| 8  | 1 | 0 | 0.681034  | 1.927273  | -0.785735 |
| 9  | 7 | 0 | -1.479322 | -0.305748 | -0.809344 |
| 10 | 1 | 0 | -1.951270 | 0.534497  | -1.139965 |
| 11 | 8 | 0 | 2.049382  | -0.815110 | -0.034876 |

**503**

Standard orientation:

| Center<br>Number | Atomic<br>Number | Atomic<br>Type | Coordinates (Angstroms) |           |           |
|------------------|------------------|----------------|-------------------------|-----------|-----------|
|                  |                  |                | X                       | Y         | Z         |
| 1                | 6                | 0              | -0.914005               | 0.073069  | -0.476763 |
| 2                | 6                | 0              | 0.457056                | 0.147383  | 0.025952  |
| 3                | 6                | 0              | 1.563817                | -0.639418 | 0.461084  |
| 4                | 1                | 0              | 2.043504                | -1.335404 | 1.137314  |
| 5                | 8                | 0              | -1.749121               | -0.893120 | 0.079742  |
| 6                | 1                | 0              | -2.640539               | -0.533284 | 0.098040  |
| 7                | 6                | 0              | -0.438883               | 1.264176  | 0.393634  |
| 8                | 1                | 0              | -0.317936               | 2.227617  | -0.094819 |
| 9                | 7                | 0              | 1.827667                | 0.017841  | -0.583030 |
| 10               | 1                | 0              | -0.814555               | 1.300603  | 1.413067  |
| 11               | 1                | 0              | -1.079084               | 0.289288  | -1.533775 |

**504**

Standard orientation:

| Center | Atomic | Atomic | Coordinates (Angstroms) |   |   |
|--------|--------|--------|-------------------------|---|---|
| Number | Number | Type   | X                       | Y | Z |

| Number | Number | Type | X         | Y         | Z         |
|--------|--------|------|-----------|-----------|-----------|
| 1      | 6      | 0    | -1.000541 | 0.075141  | 0.033483  |
| 2      | 6      | 0    | 0.445121  | 0.192313  | 0.024262  |
| 3      | 6      | 0    | 1.664639  | -0.285558 | 0.677884  |
| 4      | 1      | 0    | 2.377851  | 0.412659  | 1.108769  |
| 5      | 8      | 0    | -2.005224 | -0.798794 | 0.042021  |
| 6      | 1      | 0    | -2.836626 | -0.312803 | -0.002888 |
| 7      | 6      | 0    | -0.553076 | 1.305566  | -0.002925 |
| 8      | 7      | 0    | 1.546386  | -0.200290 | -0.817792 |
| 9      | 1      | 0    | -0.719098 | 2.368446  | -0.046322 |
| 10     | 1      | 0    | 1.398010  | -1.129412 | -1.206807 |
| 11     | 1      | 0    | 1.660100  | -1.271278 | 1.139392  |

**505**

Standard orientation:

| Center<br>Number | Atomic<br>Number | Atomic<br>Type | Coordinates (Angstroms) |           |           |
|------------------|------------------|----------------|-------------------------|-----------|-----------|
|                  |                  |                | X                       | Y         | Z         |
| 1                | 8                | 0              | -1.498501               | -0.408027 | 0.788281  |
| 2                | 7                | 0              | -1.587533               | -0.463392 | -0.721393 |
| 3                | 1                | 0              | -2.275055               | 0.267806  | -0.931635 |
| 4                | 6                | 0              | -0.520509               | 0.147303  | -0.012955 |
| 5                | 6                | 0              | 0.309068                | 1.334294  | 0.018696  |
| 6                | 6                | 0              | 0.929912                | 0.167394  | -0.024078 |
| 7                | 6                | 0              | 2.190998                | -0.602834 | -0.031632 |
| 8                | 1                | 0              | 2.236732                | -1.234992 | -0.922971 |
| 9                | 1                | 0              | 3.062586                | 0.054586  | -0.012231 |
| 10               | 1                | 0              | 0.396339                | 2.409754  | 0.072726  |

11 1 0 2.223319 -1.266142 0.837426

**506**

Standard orientation:

| Center<br>Number | Atomic<br>Number | Atomic<br>Type | Coordinates (Angstroms) |           |           |
|------------------|------------------|----------------|-------------------------|-----------|-----------|
|                  |                  |                | X                       | Y         | Z         |
| 1                | 8                | 0              | 1.436925                | -0.427434 | -0.775896 |
| 2                | 7                | 0              | 1.527411                | -0.459226 | 0.717868  |
| 3                | 1                | 0              | 2.161494                | 0.321660  | 0.920203  |
| 4                | 6                | 0              | 0.428529                | 0.084507  | 0.006591  |
| 5                | 6                | 0              | -0.362267               | 1.359284  | -0.028102 |
| 6                | 6                | 0              | -1.006569               | -0.000349 | 0.028073  |
| 7                | 1                | 0              | -0.408082               | 1.907031  | -0.967783 |
| 8                | 1                | 0              | -0.382884               | 1.984076  | 0.863668  |
| 9                | 6                | 0              | -2.121593               | -0.704545 | 0.039611  |
| 10               | 1                | 0              | -2.091989               | -1.789166 | 0.061490  |
| 11               | 1                | 0              | -3.094423               | -0.222930 | 0.027472  |

**600**

Standard orientation:

| Center<br>Number | Atomic<br>Number | Atomic<br>Type | Coordinates (Angstroms) |           |           |
|------------------|------------------|----------------|-------------------------|-----------|-----------|
|                  |                  |                | X                       | Y         | Z         |
| 1                | 6                | 0              | -0.981091               | -0.068194 | 0.000150  |
| 2                | 8                | 0              | -2.061076               | -0.606977 | -0.001575 |

|    |   |   |           |           |           |
|----|---|---|-----------|-----------|-----------|
| 3  | 6 | 0 | 0.272365  | -0.971695 | 0.001500  |
| 4  | 1 | 0 | 0.209040  | -1.620348 | 0.880734  |
| 5  | 1 | 0 | 0.208598  | -1.623790 | -0.875118 |
| 6  | 6 | 0 | -0.791364 | 1.424303  | 0.000706  |
| 7  | 1 | 0 | -0.213512 | 1.731787  | 0.878433  |
| 8  | 1 | 0 | -0.212261 | 1.732109  | -0.876084 |
| 9  | 1 | 0 | -1.764687 | 1.913256  | 0.000033  |
| 10 | 6 | 0 | 1.555368  | -0.275992 | -0.000053 |
| 11 | 7 | 0 | 2.561394  | 0.296039  | -0.001316 |

**601**

Standard orientation:

| Center<br>Number | Atomic<br>Number | Atomic<br>Type | Coordinates (Angstroms) |           |           |
|------------------|------------------|----------------|-------------------------|-----------|-----------|
|                  |                  |                | X                       | Y         | Z         |
| 1                | 6                | 0              | -1.888254               | 0.434126  | -0.000218 |
| 2                | 8                | 0              | -2.325547               | -0.690768 | 0.000067  |
| 3                | 1                | 0              | -2.566608               | 1.312194  | -0.000192 |
| 4                | 6                | 0              | -0.415788               | 0.761883  | 0.000078  |
| 5                | 1                | 0              | -0.202876               | 1.389068  | 0.874665  |
| 6                | 1                | 0              | -0.202092               | 1.389932  | -0.873565 |
| 7                | 6                | 0              | 0.448697                | -0.501683 | -0.000041 |
| 8                | 1                | 0              | 0.219380                | -1.114883 | -0.876046 |
| 9                | 1                | 0              | 0.219251                | -1.115390 | 0.875593  |
| 10               | 6                | 0              | 1.876283                | -0.183818 | 0.000084  |
| 11               | 7                | 0              | 3.001671                | 0.086025  | -0.000059 |

**602**

Standard orientation:

| Center<br>Number | Atomic<br>Number | Atomic<br>Type | Coordinates (Angstroms) |           |           |
|------------------|------------------|----------------|-------------------------|-----------|-----------|
|                  |                  |                | X                       | Y         | Z         |
| 1                | 6                | 0              | -0.788691               | -0.096356 | 0.000072  |
| 2                | 6                | 0              | 0.325247                | -0.852339 | 0.000204  |
| 3                | 1                | 0              | 0.246555                | -1.932932 | 0.000317  |
| 4                | 6                | 0              | 1.622593                | -0.271871 | 0.000117  |
| 5                | 7                | 0              | 2.681657                | 0.205236  | -0.000245 |
| 6                | 8                | 0              | -1.979821               | -0.730381 | -0.000161 |
| 7                | 1                | 0              | -2.694082               | -0.087323 | -0.000552 |
| 8                | 6                | 0              | -0.820828               | 1.400022  | 0.000075  |
| 9                | 1                | 0              | -1.350264               | 1.765138  | 0.887174  |
| 10               | 1                | 0              | 0.184958                | 1.819475  | 0.000235  |
| 11               | 1                | 0              | -1.350120               | 1.765304  | -0.886981 |

**603**

Standard orientation:

| Center<br>Number | Atomic<br>Number | Atomic<br>Type | Coordinates (Angstroms) |           |           |
|------------------|------------------|----------------|-------------------------|-----------|-----------|
|                  |                  |                | X                       | Y         | Z         |
| 1                | 6                | 0              | 1.335110                | -0.214883 | 0.158067  |
| 2                | 8                | 0              | 1.456952                | -1.327981 | -0.274535 |
| 3                | 1                | 0              | 2.213438                | 0.425896  | 0.386213  |
| 4                | 6                | 0              | 0.004961                | 0.479385  | 0.445314  |
| 5                | 1                | 0              | -0.011247               | 0.679449  | 1.525799  |
| 6                | 6                | 0              | -0.066493               | 1.824895  | -0.302262 |

|    |   |   |           |           |           |
|----|---|---|-----------|-----------|-----------|
| 7  | 1 | 0 | -0.973955 | 2.364673  | -0.027818 |
| 8  | 1 | 0 | 0.795957  | 2.443500  | -0.039570 |
| 9  | 1 | 0 | -0.068942 | 1.665916  | -1.382707 |
| 10 | 6 | 0 | -1.137197 | -0.381320 | 0.130228  |
| 11 | 7 | 0 | -2.061307 | -1.029148 | -0.121959 |

**604**

Standard orientation:

| Center<br>Number | Atomic<br>Number | Atomic<br>Type | Coordinates (Angstroms) |           |           |
|------------------|------------------|----------------|-------------------------|-----------|-----------|
|                  |                  |                | X                       | Y         | Z         |
| 1                | 6                | 0              | 0.199698                | 0.439986  | -0.000001 |
| 2                | 6                | 0              | -1.140566               | 0.496048  | -0.000005 |
| 3                | 1                | 0              | -1.645615               | 1.460089  | -0.000029 |
| 4                | 6                | 0              | 0.856569                | -0.832580 | -0.000001 |
| 5                | 7                | 0              | 1.430388                | -1.841064 | -0.000005 |
| 6                | 6                | 0              | 1.065877                | 1.673743  | 0.000003  |
| 7                | 1                | 0              | 1.711218                | 1.700211  | 0.882985  |
| 8                | 1                | 0              | 1.711217                | 1.700225  | -0.882979 |
| 9                | 1                | 0              | 0.450341                | 2.577019  | 0.000010  |
| 10               | 8                | 0              | -1.911299               | -0.606431 | 0.000018  |
| 11               | 1                | 0              | -2.838945               | -0.361835 | -0.000078 |

**605**

Standard orientation:

| Center<br>Number | Atomic<br>Number | Atomic<br>Type | Coordinates (Angstroms) |  |  |
|------------------|------------------|----------------|-------------------------|--|--|
|------------------|------------------|----------------|-------------------------|--|--|

| Number | Number | Type | X         | Y         | Z         |
|--------|--------|------|-----------|-----------|-----------|
| 1      | 6      | 0    | -0.102448 | 0.177506  | -0.000006 |
| 2      | 6      | 0    | 0.852445  | -0.765785 | -0.000012 |
| 3      | 1      | 0    | 0.597807  | -1.822722 | -0.000005 |
| 4      | 6      | 0    | -1.461210 | -0.272068 | -0.000005 |
| 5      | 7      | 0    | -2.571347 | -0.611589 | 0.000008  |
| 6      | 8      | 0    | 2.161508  | -0.445073 | -0.000004 |
| 7      | 1      | 0    | 2.693952  | -1.243317 | 0.000086  |
| 8      | 6      | 0    | 0.165193  | 1.659486  | 0.000009  |
| 9      | 1      | 0    | -0.273986 | 2.132431  | 0.883087  |
| 10     | 1      | 0    | 1.239154  | 1.848138  | 0.000299  |
| 11     | 1      | 0    | -0.273450 | 2.132340  | -0.883400 |

**606**

Standard orientation:

| Center<br>Number | Atomic<br>Number | Atomic<br>Type | Coordinates (Angstroms) |           |           |
|------------------|------------------|----------------|-------------------------|-----------|-----------|
|                  |                  |                | X                       | Y         | Z         |
| 1                | 6                | 0              | 1.847958                | -0.788030 | 0.468029  |
| 2                | 6                | 0              | 0.899867                | -0.025765 | -0.074333 |
| 3                | 1                | 0              | 2.748747                | -0.360598 | 0.896792  |
| 4                | 1                | 0              | 1.739279                | -1.863809 | 0.500517  |
| 5                | 6                | 0              | -0.355094               | -0.574689 | -0.707315 |
| 6                | 1                | 0              | -0.425090               | -0.216098 | -1.740192 |
| 7                | 1                | 0              | -0.318863               | -1.665902 | -0.731212 |
| 8                | 8                | 0              | 0.918807                | 1.326603  | -0.159062 |
| 9                | 1                | 0              | 1.694135                | 1.665873  | 0.298679  |
| 10               | 6                | 0              | -1.569364               | -0.157376 | 0.002113  |

|    |   |   |           |          |          |
|----|---|---|-----------|----------|----------|
| 11 | 7 | 0 | -2.532696 | 0.157553 | 0.559564 |
|----|---|---|-----------|----------|----------|

---

**607**

Standard orientation:

| Center<br>Number | Atomic<br>Number | Atomic<br>Type | Coordinates (Angstroms) |           |           |
|------------------|------------------|----------------|-------------------------|-----------|-----------|
|                  |                  |                | X                       | Y         | Z         |
| 1                | 6                | 0              | -0.839573               | -0.720606 | -0.000032 |
| 2                | 6                | 0              | 0.139405                | 0.193517  | 0.000008  |
| 3                | 1                | 0              | -0.531901               | -1.760454 | -0.000042 |
| 4                | 6                | 0              | 1.518722                | -0.225450 | -0.000008 |
| 5                | 7                | 0              | 2.619484                | -0.585847 | 0.000015  |
| 6                | 8                | 0              | 0.022954                | 1.545983  | -0.000004 |
| 7                | 1                | 0              | -0.909131               | 1.783626  | -0.000022 |
| 8                | 6                | 0              | -2.310275               | -0.439995 | 0.000011  |
| 9                | 1                | 0              | -2.786592               | -0.881348 | -0.881255 |
| 10               | 1                | 0              | -2.786363               | -0.880355 | 0.881922  |
| 11               | 1                | 0              | -2.555715               | 0.626796  | -0.000550 |

---

**608**

Standard orientation:

| Center<br>Number | Atomic<br>Number | Atomic<br>Type | Coordinates (Angstroms) |          |           |
|------------------|------------------|----------------|-------------------------|----------|-----------|
|                  |                  |                | X                       | Y        | Z         |
| 1                | 6                | 0              | 1.091761                | 0.577244 | 0.000025  |
| 2                | 6                | 0              | -0.245725               | 0.520098 | -0.000169 |

---

|    |   |   |           |           |           |
|----|---|---|-----------|-----------|-----------|
| 3  | 1 | 0 | 1.550353  | 1.565329  | 0.000222  |
| 4  | 6 | 0 | -0.946521 | -0.739981 | -0.000086 |
| 5  | 7 | 0 | -1.482945 | -1.766681 | 0.000074  |
| 6  | 8 | 0 | -1.105508 | 1.573551  | 0.000092  |
| 7  | 1 | 0 | -0.596860 | 2.390418  | -0.000187 |
| 8  | 6 | 0 | 2.013649  | -0.601549 | 0.000024  |
| 9  | 1 | 0 | 1.466061  | -1.546480 | 0.000719  |
| 10 | 1 | 0 | 2.662537  | -0.583271 | -0.881774 |
| 11 | 1 | 0 | 2.663606  | -0.582507 | 0.881002  |

---

**609**

Standard orientation:

| Center<br>Number | Atomic<br>Number | Atomic<br>Type | Coordinates (Angstroms) |           |           |
|------------------|------------------|----------------|-------------------------|-----------|-----------|
|                  |                  |                | X                       | Y         | Z         |
| 1                | 6                | 0              | 2.202842                | -0.672790 | 0.157535  |
| 2                | 6                | 0              | 1.137758                | -0.150930 | -0.436514 |
| 3                | 1                | 0              | 2.275865                | -0.749899 | 1.239063  |
| 4                | 1                | 0              | 3.042595                | -1.045436 | -0.418661 |
| 5                | 1                | 0              | 1.066073                | -0.072379 | -1.517887 |
| 6                | 6                | 0              | -0.057998               | 0.369894  | 0.317286  |
| 7                | 1                | 0              | 0.149336                | 0.336423  | 1.397094  |
| 8                | 8                | 0              | -0.317212               | 1.680470  | -0.129332 |
| 9                | 1                | 0              | -1.103899               | 2.010248  | 0.316235  |
| 10               | 6                | 0              | -1.233323               | -0.507411 | 0.077351  |
| 11               | 7                | 0              | -2.169707               | -1.165043 | -0.096448 |

---

610

Standard orientation:

| Center<br>Number | Atomic<br>Number | Atomic<br>Type | Coordinates (Angstroms) |           |           |
|------------------|------------------|----------------|-------------------------|-----------|-----------|
|                  |                  |                | X                       | Y         | Z         |
| 1                | 6                | 0              | 1.709756                | 0.601834  | -0.000113 |
| 2                | 6                | 0              | 0.384876                | 0.712569  | 0.000442  |
| 3                | 1                | 0              | 2.358877                | 1.473701  | -0.000320 |
| 4                | 1                | 0              | -0.063678               | 1.697562  | 0.000721  |
| 5                | 8                | 0              | 2.310926                | -0.618742 | -0.000362 |
| 6                | 1                | 0              | 3.264149                | -0.514557 | -0.001289 |
| 7                | 6                | 0              | -0.506816               | -0.508209 | 0.000766  |
| 8                | 1                | 0              | -0.304943               | -1.135769 | 0.876858  |
| 9                | 1                | 0              | -0.304143               | -1.136781 | -0.874413 |
| 10               | 6                | 0              | -1.930324               | -0.168329 | -0.000056 |
| 11               | 7                | 0              | -3.054661               | 0.105513  | -0.000700 |

611

Standard orientation:

| Center<br>Number | Atomic<br>Number | Atomic<br>Type | Coordinates (Angstroms) |           |           |
|------------------|------------------|----------------|-------------------------|-----------|-----------|
|                  |                  |                | X                       | Y         | Z         |
| 1                | 6                | 0              | 1.522936                | 0.124913  | -0.306177 |
| 2                | 6                | 0              | 0.444556                | 0.164115  | 0.471597  |
| 3                | 1                | 0              | 1.530069                | 0.589497  | -1.292107 |
| 4                | 1                | 0              | 0.463647                | -0.316869 | 1.444046  |
| 5                | 6                | 0              | -0.820434               | 0.862453  | 0.047983  |
| 6                | 1                | 0              | -1.098038               | 1.645189  | 0.763682  |

|    |   |   |           |           |           |
|----|---|---|-----------|-----------|-----------|
| 7  | 1 | 0 | -0.689340 | 1.353847  | -0.922135 |
| 8  | 6 | 0 | -1.961420 | -0.057853 | -0.061521 |
| 9  | 7 | 0 | -2.855416 | -0.788697 | -0.139089 |
| 10 | 8 | 0 | 2.668796  | -0.484168 | 0.085971  |
| 11 | 1 | 0 | 3.317374  | -0.439211 | -0.618929 |

612

Standard orientation:

| Center<br>Number | Atomic<br>Number | Atomic<br>Type | Coordinates (Angstroms) |           |           |
|------------------|------------------|----------------|-------------------------|-----------|-----------|
|                  |                  |                | X                       | Y         | Z         |
| 1                | 6                | 0              | -0.444687               | 1.873169  | -0.192025 |
| 2                | 6                | 0              | -0.145325               | 0.600881  | 0.073865  |
| 3                | 1                | 0              | -1.456932               | 2.187251  | -0.419926 |
| 4                | 1                | 0              | 0.329658                | 2.633245  | -0.182230 |
| 5                | 6                | 0              | -1.163877               | -0.416829 | 0.045240  |
| 6                | 7                | 0              | -1.924287               | -1.292306 | 0.037706  |
| 7                | 6                | 0              | 1.242836                | 0.092949  | 0.421687  |
| 8                | 1                | 0              | 1.258223                | -0.201108 | 1.481876  |
| 9                | 1                | 0              | 1.958305                | 0.908583  | 0.293546  |
| 10               | 8                | 0              | 1.663533                | -0.955715 | -0.414499 |
| 11               | 1                | 0              | 1.138812                | -1.737135 | -0.213818 |

613

Standard orientation:

| Center | Atomic | Atomic | Coordinates (Angstroms) |   |   |
|--------|--------|--------|-------------------------|---|---|
| Number | Number | Type   | X                       | Y | Z |



| Number | Number | Type | X         | Y         | Z         |
|--------|--------|------|-----------|-----------|-----------|
| 1      | 6      | 0    | -0.869793 | 1.039594  | -0.046035 |
| 2      | 6      | 0    | 0.449146  | 0.879515  | 0.097399  |
| 3      | 1      | 0    | -1.309533 | 2.024736  | -0.155605 |
| 4      | 1      | 0    | 1.090473  | 1.756704  | 0.096097  |
| 5      | 6      | 0    | -1.779379 | -0.067171 | -0.056314 |
| 6      | 7      | 0    | -2.511482 | -0.966911 | -0.062233 |
| 7      | 6      | 0    | 1.151850  | -0.426791 | 0.299602  |
| 8      | 1      | 0    | 0.556392  | -1.247666 | -0.125282 |
| 9      | 1      | 0    | 1.229273  | -0.609112 | 1.384704  |
| 10     | 8      | 0    | 2.425457  | -0.320736 | -0.298598 |
| 11     | 1      | 0    | 2.899167  | -1.141278 | -0.143406 |

**614**

Standard orientation:

| Center<br>Number | Atomic<br>Number | Atomic<br>Type | Coordinates (Angstroms) |           |           |
|------------------|------------------|----------------|-------------------------|-----------|-----------|
|                  |                  |                | X                       | Y         | Z         |
| 1                | 6                | 0              | -0.440594               | 0.857627  | 0.000033  |
| 2                | 6                | 0              | 0.882088                | 1.050689  | 0.000108  |
| 3                | 1                | 0              | -1.105517               | 1.716755  | 0.000044  |
| 4                | 1                | 0              | 1.311527                | 2.045846  | 0.000205  |
| 5                | 6                | 0              | -1.114517               | -0.482319 | -0.000117 |
| 6                | 1                | 0              | -0.787127               | -1.052848 | 0.883527  |
| 7                | 1                | 0              | -0.787087               | -1.052653 | -0.883866 |
| 8                | 8                | 0              | -2.506696               | -0.260108 | -0.000107 |
| 9                | 1                | 0              | -2.948602               | -1.112191 | -0.001105 |
| 10               | 6                | 0              | 1.797584                | -0.050107 | -0.000047 |

11 7 0 2.517573 -0.959911 0.000312

**615**

Standard orientation:

| Center<br>Number | Atomic<br>Number | Atomic<br>Type | Coordinates (Angstroms) |           |           |
|------------------|------------------|----------------|-------------------------|-----------|-----------|
|                  |                  |                | X                       | Y         | Z         |
| 1                | 6                | 0              | -0.314080               | -0.125161 | 0.004575  |
| 2                | 6                | 0              | 0.803021                | 0.606511  | -0.003142 |
| 3                | 1                | 0              | -0.262350               | -1.210789 | 0.012236  |
| 4                | 1                | 0              | 0.775453                | 1.693164  | -0.011187 |
| 5                | 6                | 0              | 2.103806                | 0.011513  | -0.001225 |
| 6                | 7                | 0              | 3.165718                | -0.454485 | 0.000145  |
| 7                | 6                | 0              | -1.698551               | 0.456372  | 0.004592  |
| 8                | 1                | 0              | -1.820598               | 1.105199  | -0.877149 |
| 9                | 1                | 0              | -1.825414               | 1.092331  | 0.895038  |
| 10               | 8                | 0              | -2.611232               | -0.616716 | -0.005490 |
| 11               | 1                | 0              | -3.502444               | -0.260196 | -0.004824 |

**616**

Standard orientation:

| Center<br>Number | Atomic<br>Number | Atomic<br>Type | Coordinates (Angstroms) |          |          |
|------------------|------------------|----------------|-------------------------|----------|----------|
|                  |                  |                | X                       | Y        | Z        |
| 1                | 6                | 0              | -0.057996               | 0.369876 | 0.317302 |
| 2                | 1                | 0              | 0.149524                | 0.336542 | 1.397092 |

|    |   |   |           |           |           |
|----|---|---|-----------|-----------|-----------|
| 3  | 6 | 0 | 1.137661  | -0.151158 | -0.436543 |
| 4  | 6 | 0 | 2.202910  | -0.672651 | 0.157515  |
| 5  | 1 | 0 | 1.065660  | -0.073124 | -1.517923 |
| 6  | 1 | 0 | 3.042585  | -1.045466 | -0.418689 |
| 7  | 1 | 0 | 2.276246  | -0.749241 | 1.239055  |
| 8  | 8 | 0 | -0.317142 | 1.680416  | -0.129475 |
| 9  | 1 | 0 | -1.103801 | 2.010320  | 0.316048  |
| 10 | 6 | 0 | -1.233301 | -0.507487 | 0.077668  |
| 11 | 7 | 0 | -2.169818 | -1.164835 | -0.096491 |

617

Standard orientation:

| Center<br>Number | Atomic<br>Number | Atomic<br>Type | Coordinates (Angstroms) |           |           |
|------------------|------------------|----------------|-------------------------|-----------|-----------|
|                  |                  |                | X                       | Y         | Z         |
| 1                | 6                | 0              | -1.619135               | 0.649691  | 0.000026  |
| 2                | 6                | 0              | -0.303205               | 0.784817  | 0.000016  |
| 3                | 1                | 0              | -2.187875               | 1.573749  | 0.000045  |
| 4                | 1                | 0              | 0.250979                | 1.715175  | 0.000025  |
| 5                | 6                | 0              | -2.345967               | -0.664912 | 0.000014  |
| 6                | 1                | 0              | -2.083979               | -1.259206 | 0.880700  |
| 7                | 1                | 0              | -3.426165               | -0.513973 | 0.000004  |
| 8                | 1                | 0              | -2.083961               | -1.259200 | -0.880669 |
| 9                | 8                | 0              | 0.495687                | -0.372551 | -0.000008 |
| 10               | 6                | 0              | 1.775335                | -0.203650 | -0.000022 |
| 11               | 7                | 0              | 2.931905                | -0.095974 | -0.000035 |

700

Standard orientation:

| Center<br>Number | Atomic<br>Number | Atomic<br>Type | Coordinates (Angstroms) |           |           |
|------------------|------------------|----------------|-------------------------|-----------|-----------|
|                  |                  |                | X                       | Y         | Z         |
| 1                | 6                | 0              | -0.048779               | 0.453136  | 0.000000  |
| 2                | 8                | 0              | -0.625448               | 1.525335  | -0.000006 |
| 3                | 6                | 0              | 1.430259                | 0.393909  | 0.000009  |
| 4                | 6                | 0              | 2.164171                | -0.719851 | -0.000004 |
| 5                | 1                | 0              | 1.905201                | 1.371116  | 0.000023  |
| 6                | 1                | 0              | 3.247927                | -0.667186 | -0.000001 |
| 7                | 1                | 0              | 1.732886                | -1.715064 | -0.000023 |
| 8                | 6                | 0              | -0.882748               | -0.818477 | -0.000006 |
| 9                | 1                | 0              | -0.387033               | -1.789414 | 0.000020  |
| 10               | 7                | 0              | -2.148677               | -0.780509 | 0.000005  |
| 11               | 1                | 0              | -2.432068               | 0.209132  | 0.000000  |

701

Standard orientation:

| Center<br>Number | Atomic<br>Number | Atomic<br>Type | Coordinates (Angstroms) |           |           |
|------------------|------------------|----------------|-------------------------|-----------|-----------|
|                  |                  |                | X                       | Y         | Z         |
| 1                | 6                | 0              | 1.837926                | -0.401130 | -0.000077 |
| 2                | 8                | 0              | 2.916756                | 0.144896  | 0.000074  |
| 3                | 1                | 0              | 1.717884                | -1.502092 | -0.000324 |
| 4                | 6                | 0              | 0.556393                | 0.351519  | -0.000003 |
| 5                | 1                | 0              | 0.622007                | 1.447587  | -0.000192 |
| 6                | 7                | 0              | -0.533947               | -0.311066 | 0.000070  |

|    |   |   |           |           |           |
|----|---|---|-----------|-----------|-----------|
| 7  | 6 | 0 | -1.738602 | 0.402063  | -0.000019 |
| 8  | 6 | 0 | -2.901612 | -0.248337 | 0.000010  |
| 9  | 1 | 0 | -1.696022 | 1.494552  | -0.000092 |
| 10 | 1 | 0 | -3.844257 | 0.286393  | -0.000033 |
| 11 | 1 | 0 | -2.920663 | -1.332843 | 0.000085  |

**702**

Standard orientation:

| Center<br>Number | Atomic<br>Number | Atomic<br>Type | Coordinates (Angstroms) |           |           |
|------------------|------------------|----------------|-------------------------|-----------|-----------|
|                  |                  |                | X                       | Y         | Z         |
| 1                | 6                | 0              | -1.090944               | 0.744074  | -0.000184 |
| 2                | 8                | 0              | -0.633394               | 1.857244  | 0.000412  |
| 3                | 1                | 0              | -2.192809               | 0.578451  | -0.000846 |
| 4                | 6                | 0              | -0.323964               | -0.539925 | -0.000089 |
| 5                | 6                | 0              | -1.040041               | -1.671523 | -0.000300 |
| 6                | 1                | 0              | -0.568167               | -2.649728 | -0.000209 |
| 7                | 1                | 0              | -2.126506               | -1.653004 | -0.000577 |
| 8                | 6                | 0              | 1.153873                | -0.612544 | 0.000213  |
| 9                | 1                | 0              | 1.535395                | -1.644977 | 0.000756  |
| 10               | 7                | 0              | 1.905884                | 0.410426  | -0.000076 |
| 11               | 1                | 0              | 2.884513                | 0.117838  | 0.000272  |

**703**

Standard orientation:

| Center<br>Number | Atomic<br>Number | Atomic<br>Type | Coordinates (Angstroms) |  |  |
|------------------|------------------|----------------|-------------------------|--|--|
|------------------|------------------|----------------|-------------------------|--|--|

| Number | Number | Type | X         | Y         | Z         |
|--------|--------|------|-----------|-----------|-----------|
| 1      | 6      | 0    | -0.032255 | 0.498248  | 0.000003  |
| 2      | 8      | 0    | -0.511649 | 1.611849  | -0.000007 |
| 3      | 6      | 0    | 1.445616  | 0.326736  | 0.000015  |
| 4      | 6      | 0    | 2.119547  | -0.824010 | -0.000016 |
| 5      | 1      | 0    | 1.978307  | 1.274070  | 0.000041  |
| 6      | 1      | 0    | 3.204795  | -0.828107 | -0.000013 |
| 7      | 1      | 0    | 1.641088  | -1.797667 | -0.000051 |
| 8      | 6      | 0    | -0.925520 | -0.729051 | 0.000012  |
| 9      | 1      | 0    | -0.437923 | -1.709796 | 0.000098  |
| 10     | 7      | 0    | -2.183643 | -0.569505 | -0.000018 |
| 11     | 1      | 0    | -2.651905 | -1.478292 | 0.000026  |

**704**

Standard orientation:

| Center<br>Number | Atomic<br>Number | Atomic<br>Type | Coordinates (Angstroms) |           |           |
|------------------|------------------|----------------|-------------------------|-----------|-----------|
|                  |                  |                | X                       | Y         | Z         |
| 1                | 6                | 0              | 0.064886                | 0.681127  | 0.000068  |
| 2                | 8                | 0              | -0.056804               | 1.896227  | 0.000379  |
| 3                | 6                | 0              | 1.406834                | 0.022228  | -0.000909 |
| 4                | 6                | 0              | 1.631714                | -1.287684 | 0.000429  |
| 5                | 1                | 0              | 2.217473                | 0.744210  | -0.002622 |
| 6                | 1                | 0              | 2.641052                | -1.684683 | -0.000322 |
| 7                | 1                | 0              | 0.819910                | -2.009563 | 0.002318  |
| 8                | 7                | 0              | -0.986044               | -0.154885 | 0.001099  |
| 9                | 6                | 0              | -2.000172               | -0.870288 | -0.000757 |
| 10               | 1                | 0              | -2.470251               | -1.202344 | -0.935585 |

|    |   |   |           |           |          |
|----|---|---|-----------|-----------|----------|
| 11 | 1 | 0 | -2.471022 | -1.205543 | 0.932507 |
|----|---|---|-----------|-----------|----------|

---

# 800

Standard orientation:

---

| Center<br>Number | Atomic<br>Number | Atomic<br>Type | Coordinates (Angstroms) |           |           |
|------------------|------------------|----------------|-------------------------|-----------|-----------|
|                  |                  |                | X                       | Y         | Z         |
| 1                | 6                | 0              | -1.575497               | -0.074670 | -0.345080 |
| 2                | 8                | 0              | -2.556465               | -0.647574 | 0.074411  |
| 3                | 1                | 0              | -1.408696               | 0.134911  | -1.420331 |
| 4                | 7                | 0              | -0.568642               | 0.409869  | 0.435859  |
| 5                | 1                | 0              | -0.613087               | 0.165842  | 1.415251  |
| 6                | 6                | 0              | 0.670833                | 0.943524  | -0.090812 |
| 7                | 1                | 0              | 0.945103                | 1.849126  | 0.460598  |
| 8                | 1                | 0              | 0.490275                | 1.255106  | -1.125436 |
| 9                | 6                | 0              | 1.788535                | -0.009317 | -0.054660 |
| 10               | 6                | 0              | 2.701906                | -0.792732 | -0.009561 |
| 11               | 1                | 0              | 3.503957                | -1.494306 | 0.024300  |

---

# 801

Standard orientation:

---

| Center<br>Number | Atomic<br>Number | Atomic<br>Type | Coordinates (Angstroms) |           |          |
|------------------|------------------|----------------|-------------------------|-----------|----------|
|                  |                  |                | X                       | Y         | Z        |
| 1                | 6                | 0              | -2.667090               | -0.414271 | 0.000063 |
| 2                | 6                | 0              | -1.516664               | -0.051696 | 0.000007 |

---

|    |   |   |           |           |           |
|----|---|---|-----------|-----------|-----------|
| 3  | 1 | 0 | -3.690330 | -0.716258 | 0.000103  |
| 4  | 6 | 0 | -0.109446 | 0.335181  | -0.000027 |
| 5  | 8 | 0 | 0.235845  | 1.497305  | -0.000020 |
| 6  | 6 | 0 | 0.890100  | -0.818630 | -0.000128 |
| 7  | 1 | 0 | 0.672762  | -1.447863 | 0.872485  |
| 8  | 1 | 0 | 0.672879  | -1.447504 | -0.873040 |
| 9  | 7 | 0 | 2.279362  | -0.427728 | 0.000078  |
| 10 | 1 | 0 | 2.460511  | 0.162166  | -0.806279 |
| 11 | 1 | 0 | 2.460485  | 0.161613  | 0.806848  |

---

# 802

Standard orientation:

---

| Center<br>Number | Atomic<br>Number | Atomic<br>Type | Coordinates (Angstroms) |           |           |
|------------------|------------------|----------------|-------------------------|-----------|-----------|
|                  |                  |                | X                       | Y         | Z         |
| 1                | 6                | 0              | 0.502462                | 0.764995  | 0.373558  |
| 2                | 1                | 0              | 1.080042                | 1.670279  | 0.190425  |
| 3                | 1                | 0              | 0.238532                | 0.706394  | 1.436247  |
| 4                | 8                | 0              | -0.702332               | 0.893576  | -0.404242 |
| 5                | 6                | 0              | -1.630511               | 0.023518  | -0.120013 |
| 6                | 6                | 0              | -2.495124               | -0.775932 | 0.133251  |
| 7                | 1                | 0              | -3.276341               | -1.465328 | 0.347408  |
| 8                | 6                | 0              | 1.292866                | -0.448047 | -0.037617 |
| 9                | 1                | 0              | 0.694257                | -1.330668 | -0.300717 |
| 10               | 7                | 0              | 2.559012                | -0.401573 | -0.033217 |
| 11               | 1                | 0              | 2.950923                | -1.305477 | -0.301988 |

---

**900**

Standard orientation:

| Center<br>Number | Atomic<br>Number | Atomic<br>Type | Coordinates (Angstroms) |           |           |
|------------------|------------------|----------------|-------------------------|-----------|-----------|
|                  |                  |                | X                       | Y         | Z         |
| 1                | 6                | 0              | -0.980720               | -0.113307 | 0.000101  |
| 2                | 6                | 0              | 0.281380                | -0.869088 | -0.000079 |
| 3                | 1                | 0              | 0.245271                | -1.952104 | -0.000341 |
| 4                | 7                | 0              | -2.064366               | -0.787719 | 0.000001  |
| 5                | 1                | 0              | -2.867591               | -0.157463 | -0.000050 |
| 6                | 6                | 0              | 1.473124                | -0.299954 | 0.000046  |
| 7                | 8                | 0              | 2.524667                | 0.199413  | 0.000132  |
| 8                | 6                | 0              | -0.873898               | 1.395764  | -0.000103 |
| 9                | 1                | 0              | -0.330120               | 1.745478  | 0.883799  |
| 10               | 1                | 0              | -0.330212               | 1.745252  | -0.884153 |
| 11               | 1                | 0              | -1.863437               | 1.857077  | -0.000110 |

**901**

Standard orientation:

| Center<br>Number | Atomic<br>Number | Atomic<br>Type | Coordinates (Angstroms) |           |           |
|------------------|------------------|----------------|-------------------------|-----------|-----------|
|                  |                  |                | X                       | Y         | Z         |
| 1                | 6                | 0              | 0.819488                | -0.700680 | 0.000667  |
| 2                | 8                | 0              | 1.409216                | -1.700179 | -0.000409 |
| 3                | 6                | 0              | 0.166548                | 0.457297  | 0.000716  |
| 4                | 6                | 0              | -1.294811               | 0.382746  | 0.000136  |
| 5                | 1                | 0              | -1.777748               | 1.370338  | -0.000196 |
| 6                | 7                | 0              | -1.931503               | -0.723004 | -0.000175 |

|    |   |   |           |           |           |
|----|---|---|-----------|-----------|-----------|
| 7  | 1 | 0 | -2.936072 | -0.555785 | -0.000739 |
| 8  | 6 | 0 | 0.920837  | 1.772227  | -0.000303 |
| 9  | 1 | 0 | 1.546510  | 1.897458  | 0.887706  |
| 10 | 1 | 0 | 1.549945  | 1.894161  | -0.886334 |
| 11 | 1 | 0 | 0.191787  | 2.586755  | -0.003232 |

**902**

Standard orientation:

| Center<br>Number | Atomic<br>Number | Atomic<br>Type | Coordinates (Angstroms) |           |           |
|------------------|------------------|----------------|-------------------------|-----------|-----------|
|                  |                  |                | X                       | Y         | Z         |
| 1                | 6                | 0              | -1.823409               | 0.014029  | -0.150415 |
| 2                | 6                | 0              | -0.634206               | 0.483835  | -0.454741 |
| 3                | 1                | 0              | -0.505960               | 0.861621  | -1.462795 |
| 4                | 6                | 0              | 0.529367                | 0.490439  | 0.513840  |
| 5                | 1                | 0              | 0.959599                | 1.492392  | 0.597275  |
| 6                | 1                | 0              | 0.186519                | 0.191294  | 1.510969  |
| 7                | 6                | 0              | 1.617293                | -0.453540 | 0.069125  |
| 8                | 1                | 0              | 1.298931                | -1.497580 | -0.064550 |
| 9                | 7                | 0              | 2.796268                | -0.036234 | -0.143970 |
| 10               | 1                | 0              | 3.397882                | -0.807466 | -0.439396 |
| 11               | 8                | 0              | -2.880639               | -0.399401 | 0.124929  |

**903**

Standard orientation:

| Center | Atomic | Atomic | Coordinates (Angstroms) |   |   |
|--------|--------|--------|-------------------------|---|---|
| Number | Number | Type   | X                       | Y | Z |

| Number | Number | Type | X         | Y         | Z         |
|--------|--------|------|-----------|-----------|-----------|
| 1      | 6      | 0    | 1.282785  | 0.162759  | 0.000076  |
| 2      | 8      | 0    | 2.177635  | -0.584221 | 0.000165  |
| 3      | 6      | 0    | 0.426260  | 1.181137  | -0.000270 |
| 4      | 1      | 0    | 0.898673  | 2.156708  | -0.000727 |
| 5      | 6      | 0    | -1.021909 | 1.053173  | 0.000123  |
| 6      | 6      | 0    | -1.659344 | -0.121398 | 0.000180  |
| 7      | 1      | 0    | -1.590274 | 1.977893  | 0.000373  |
| 8      | 1      | 0    | -2.746710 | -0.177981 | 0.000485  |
| 9      | 7      | 0    | -0.866435 | -1.309831 | -0.000232 |
| 10     | 1      | 0    | -1.041964 | -1.884133 | 0.817945  |
| 11     | 1      | 0    | -1.042515 | -1.883936 | -0.818429 |

**904**

Standard orientation:

| Center<br>Number | Atomic<br>Number | Atomic<br>Type | Coordinates (Angstroms) |           |           |
|------------------|------------------|----------------|-------------------------|-----------|-----------|
|                  |                  |                | X                       | Y         | Z         |
| 1                | 6                | 0              | 1.701629                | 0.003973  | 0.005271  |
| 2                | 6                | 0              | 0.827885                | 1.002366  | 0.022293  |
| 3                | 1                | 0              | 1.231367                | 2.006661  | 0.056566  |
| 4                | 7                | 0              | -0.569439               | 0.853348  | -0.036719 |
| 5                | 6                | 0              | -1.129690               | -0.286732 | 0.061206  |
| 6                | 1                | 0              | -0.563000               | -1.218638 | 0.213444  |
| 7                | 6                | 0              | -2.615407               | -0.424567 | -0.026194 |
| 8                | 1                | 0              | -2.893832               | -1.075769 | -0.862459 |
| 9                | 1                | 0              | -3.015219               | -0.884884 | 0.884218  |
| 10               | 1                | 0              | -3.074273               | 0.555398  | -0.166268 |

11 8 0 2.449316 -0.890806 -0.030490

**905**

Standard orientation:

| Center<br>Number | Atomic<br>Number | Atomic<br>Type | Coordinates (Angstroms) |           |           |
|------------------|------------------|----------------|-------------------------|-----------|-----------|
|                  |                  |                | X                       | Y         | Z         |
| 1                | 6                | 0              | -1.759530               | -0.008851 | -0.000008 |
| 2                | 6                | 0              | -0.887862               | 0.983282  | -0.000004 |
| 3                | 1                | 0              | -1.322648               | 1.976049  | 0.000071  |
| 4                | 8                | 0              | -2.533370               | -0.881271 | 0.000000  |
| 5                | 6                | 0              | 0.567592                | 0.812235  | -0.000006 |
| 6                | 6                | 0              | 1.243163                | -0.339634 | 0.000009  |
| 7                | 1                | 0              | 1.144273                | 1.732331  | -0.000021 |
| 8                | 1                | 0              | 0.707529                | -1.294946 | 0.000031  |
| 9                | 7                | 0              | 2.672559                | -0.338880 | -0.000001 |
| 10               | 1                | 0              | 3.024863                | -0.836657 | 0.812382  |
| 11               | 1                | 0              | 3.024851                | -0.836643 | -0.812399 |

**906**

Standard orientation:

| Center<br>Number | Atomic<br>Number | Atomic<br>Type | Coordinates (Angstroms) |           |           |
|------------------|------------------|----------------|-------------------------|-----------|-----------|
|                  |                  |                | X                       | Y         | Z         |
| 1                | 6                | 0              | 0.826106                | -0.683325 | -0.001919 |
| 2                | 6                | 0              | 0.155719                | 0.462847  | 0.003733  |

|    |   |   |           |           |           |
|----|---|---|-----------|-----------|-----------|
| 3  | 7 | 0 | -1.250990 | 0.482627  | 0.051375  |
| 4  | 6 | 0 | -1.969610 | -0.564348 | -0.028206 |
| 5  | 1 | 0 | -1.583434 | -1.584695 | -0.151632 |
| 6  | 1 | 0 | -3.049544 | -0.447923 | 0.030446  |
| 7  | 8 | 0 | 1.366395  | -1.718670 | 0.012895  |
| 8  | 6 | 0 | 0.872870  | 1.787161  | -0.018896 |
| 9  | 1 | 0 | 0.589792  | 2.378083  | 0.857084  |
| 10 | 1 | 0 | 1.958315  | 1.659323  | -0.011676 |
| 11 | 1 | 0 | 0.600137  | 2.352170  | -0.915277 |

907

Standard orientation:

| Center<br>Number | Atomic<br>Number | Atomic<br>Type | Coordinates (Angstroms) |           |           |
|------------------|------------------|----------------|-------------------------|-----------|-----------|
|                  |                  |                | X                       | Y         | Z         |
| 1                | 7                | 0              | 2.519731                | -0.472251 | -0.091951 |
| 2                | 1                | 0              | 2.986247                | -0.601342 | 0.808668  |
| 3                | 6                | 0              | 1.341269                | -0.140516 | -0.010537 |
| 4                | 6                | 0              | 0.059433                | 0.197180  | -0.017112 |
| 5                | 8                | 0              | -0.264308               | 1.537743  | 0.077637  |
| 6                | 1                | 0              | -0.734021               | 1.777144  | -0.729327 |
| 7                | 6                | 0              | -1.002039               | -0.804952 | -0.052689 |
| 8                | 6                | 0              | -2.299298               | -0.511566 | 0.063752  |
| 9                | 1                | 0              | -0.681893               | -1.833259 | -0.201669 |
| 10               | 1                | 0              | -3.055275               | -1.285847 | 0.009779  |
| 11               | 1                | 0              | -2.634898               | 0.506238  | 0.234630  |

908

Standard orientation:

| Center<br>Number | Atomic<br>Number | Atomic<br>Type | Coordinates (Angstroms) |           |           |
|------------------|------------------|----------------|-------------------------|-----------|-----------|
|                  |                  |                | X                       | Y         | Z         |
| 1                | 6                | 0              | -1.273394               | -0.115014 | 0.000007  |
| 2                | 6                | 0              | -2.520495               | -0.497820 | 0.000023  |
| 3                | 1                | 0              | -3.063699               | -0.666768 | 0.927924  |
| 4                | 1                | 0              | -3.063687               | -0.666651 | -0.927917 |
| 5                | 6                | 0              | -0.006952               | 0.253903  | -0.000037 |
| 6                | 6                | 0              | 1.051054                | -0.774117 | -0.000029 |
| 7                | 1                | 0              | 0.663840                | -1.800235 | -0.000114 |
| 8                | 7                | 0              | 2.281500                | -0.458516 | 0.000032  |
| 9                | 1                | 0              | 2.854837                | -1.303241 | 0.000066  |
| 10               | 8                | 0              | 0.433536                | 1.540197  | -0.000001 |
| 11               | 1                | 0              | -0.331354               | 2.123212  | 0.000050  |

909

Standard orientation:

| Center<br>Number | Atomic<br>Number | Atomic<br>Type | Coordinates (Angstroms) |           |           |
|------------------|------------------|----------------|-------------------------|-----------|-----------|
|                  |                  |                | X                       | Y         | Z         |
| 1                | 6                | 0              | 0.519764                | -0.386565 | 0.051576  |
| 2                | 6                | 0              | 1.790835                | -0.302105 | 0.377208  |
| 3                | 1                | 0              | 2.169188                | -0.860398 | 1.229789  |
| 4                | 7                | 0              | -0.657746               | -0.527909 | -0.279555 |
| 5                | 8                | 0              | 2.643710                | 0.569721  | -0.273162 |
| 6                | 1                | 0              | 3.283076                | 0.046320  | -0.766080 |

|    |   |   |           |           |           |
|----|---|---|-----------|-----------|-----------|
| 7  | 6 | 0 | -1.665355 | 0.315405  | 0.243777  |
| 8  | 6 | 0 | -2.932193 | 0.154565  | -0.124392 |
| 9  | 1 | 0 | -1.358010 | 1.087209  | 0.948975  |
| 10 | 1 | 0 | -3.709574 | 0.798089  | 0.270168  |
| 11 | 1 | 0 | -3.208442 | -0.621423 | -0.829680 |

### 1000

Standard orientation:

| Center<br>Number | Atomic<br>Number | Atomic<br>Type | Coordinates (Angstroms) |           |           |
|------------------|------------------|----------------|-------------------------|-----------|-----------|
|                  |                  |                | X                       | Y         | Z         |
| 1                | 6                | 0              | -0.788207               | 0.193181  | 0.000119  |
| 2                | 8                | 0              | -0.577583               | 1.378647  | -0.000036 |
| 3                | 6                | 0              | -2.184000               | -0.394806 | -0.000006 |
| 4                | 1                | 0              | -2.719703               | -0.032709 | -0.881139 |
| 5                | 1                | 0              | -2.188670               | -1.487423 | 0.000008  |
| 6                | 1                | 0              | -2.719865               | -0.032685 | 0.881011  |
| 7                | 6                | 0              | 0.346735                | -0.837708 | -0.000022 |
| 8                | 1                | 0              | 0.232929                | -1.481949 | 0.880407  |
| 9                | 1                | 0              | 0.232860                | -1.481695 | -0.880649 |
| 10               | 7                | 0              | 1.625558                | -0.248313 | 0.000013  |
| 11               | 6                | 0              | 2.692839                | 0.243579  | 0.000002  |

### 1001

Standard orientation:

| Center<br>Number | Atomic<br>Number | Atomic<br>Type | Coordinates (Angstroms) |  |  |
|------------------|------------------|----------------|-------------------------|--|--|
|------------------|------------------|----------------|-------------------------|--|--|

| Number | Number | Type | X         | Y         | Z         |
|--------|--------|------|-----------|-----------|-----------|
| 1      | 6      | 0    | 0.754971  | -0.090057 | -0.000007 |
| 2      | 6      | 0    | -0.372679 | -0.816601 | -0.000003 |
| 3      | 1      | 0    | -0.342427 | -1.898927 | 0.000000  |
| 4      | 8      | 0    | 1.931247  | -0.765278 | 0.000006  |
| 5      | 1      | 0    | 2.660621  | -0.140472 | -0.000005 |
| 6      | 6      | 0    | 0.822187  | 1.403508  | 0.000000  |
| 7      | 1      | 0    | 1.358061  | 1.759284  | 0.887176  |
| 8      | 1      | 0    | 1.358181  | 1.759283  | -0.887104 |
| 9      | 1      | 0    | -0.174132 | 1.844200  | -0.000068 |
| 10     | 7      | 0    | -1.619465 | -0.230578 | -0.000002 |
| 11     | 6      | 0    | -2.700149 | 0.238634  | 0.000005  |

### 1002

Standard orientation:

| Center<br>Number | Atomic<br>Number | Atomic<br>Type | Coordinates (Angstroms) |           |           |
|------------------|------------------|----------------|-------------------------|-----------|-----------|
|                  |                  |                | X                       | Y         | Z         |
| 1                | 6                | 0              | 0.990941                | -0.735017 | 0.000965  |
| 2                | 6                | 0              | -0.313978               | -0.462355 | -0.000032 |
| 3                | 1                | 0              | 1.260333                | -1.785300 | 0.002252  |
| 4                | 7                | 0              | -0.782481               | 0.842183  | -0.000813 |
| 5                | 6                | 0              | -1.154408               | 1.962029  | 0.000559  |
| 6                | 8                | 0              | -1.274835               | -1.420850 | -0.001329 |
| 7                | 1                | 0              | -2.141537               | -1.005958 | 0.007993  |
| 8                | 6                | 0              | 2.063264                | 0.315778  | -0.000207 |
| 9                | 1                | 0              | 3.051739                | -0.145943 | 0.007161  |
| 10               | 1                | 0              | 1.999498                | 0.957821  | -0.885372 |



|    |   |   |          |          |          |
|----|---|---|----------|----------|----------|
| 11 | 1 | 0 | 1.991107 | 0.968298 | 0.876579 |
|----|---|---|----------|----------|----------|

---

### 1003

Standard orientation:

| Center<br>Number | Atomic<br>Number | Atomic<br>Type | Coordinates (Angstroms) |           |           |
|------------------|------------------|----------------|-------------------------|-----------|-----------|
|                  |                  |                | X                       | Y         | Z         |
| 1                | 6                | 0              | -2.019454               | -0.539323 | -0.372232 |
| 2                | 6                | 0              | -0.883354               | 0.018850  | 0.034892  |
| 3                | 1                | 0              | -2.109850               | -1.615222 | -0.449186 |
| 4                | 1                | 0              | -2.878470               | 0.074042  | -0.613756 |
| 5                | 6                | 0              | 0.316662                | -0.798836 | 0.463632  |
| 6                | 1                | 0              | 0.388996                | -0.809517 | 1.557161  |
| 7                | 1                | 0              | 0.221306                | -1.828438 | 0.114324  |
| 8                | 7                | 0              | 1.526950                | -0.243195 | -0.041664 |
| 9                | 6                | 0              | 2.527338                | 0.216081  | -0.459326 |
| 10               | 8                | 0              | -0.765384               | 1.361360  | 0.190582  |
| 11               | 1                | 0              | 0.165286                | 1.609983  | 0.156649  |

---

### 1004

Standard orientation:

| Center<br>Number | Atomic<br>Number | Atomic<br>Type | Coordinates (Angstroms) |          |           |
|------------------|------------------|----------------|-------------------------|----------|-----------|
|                  |                  |                | X                       | Y        | Z         |
| 1                | 6                | 0              | 1.481192                | 0.116715 | 0.308952  |
| 2                | 6                | 0              | 0.409939                | 0.168871 | -0.478282 |

---

|    |   |   |           |           |           |
|----|---|---|-----------|-----------|-----------|
| 3  | 1 | 0 | 1.468202  | 0.541483  | 1.312818  |
| 4  | 1 | 0 | 0.440301  | -0.273417 | -1.468741 |
| 5  | 6 | 0 | -0.860912 | 0.831070  | -0.036145 |
| 6  | 1 | 0 | -0.730458 | 1.310863  | 0.939536  |
| 7  | 1 | 0 | -1.164404 | 1.611325  | -0.742628 |
| 8  | 7 | 0 | -1.948581 | -0.092399 | 0.068008  |
| 9  | 8 | 0 | 2.642957  | -0.452260 | -0.092928 |
| 10 | 1 | 0 | 3.280648  | -0.428341 | 0.622975  |
| 11 | 6 | 0 | -2.829866 | -0.866161 | 0.139378  |

---

### 1005

Standard orientation:

| Center<br>Number | Atomic<br>Number | Atomic<br>Type | Coordinates (Angstroms) |           |           |
|------------------|------------------|----------------|-------------------------|-----------|-----------|
|                  |                  |                | X                       | Y         | Z         |
| 1                | 6                | 0              | -1.670307               | 0.605345  | 0.000188  |
| 2                | 6                | 0              | -0.345155               | 0.705959  | 0.000484  |
| 3                | 1                | 0              | -2.313917               | 1.481062  | 0.000223  |
| 4                | 1                | 0              | 0.117673                | 1.684420  | 0.000768  |
| 5                | 8                | 0              | -2.278998               | -0.612629 | -0.000166 |
| 6                | 1                | 0              | -3.231503               | -0.502362 | -0.000429 |
| 7                | 6                | 0              | 0.543339                | -0.512622 | 0.000428  |
| 8                | 1                | 0              | 0.347079                | -1.137889 | -0.877825 |
| 9                | 1                | 0              | 0.347812                | -1.137304 | 0.879264  |
| 10               | 7                | 0              | 1.922198                | -0.161038 | -0.000236 |
| 11               | 6                | 0              | 3.057032                | 0.141378  | -0.000936 |

---

**1006**

Standard orientation:

| Center<br>Number | Atomic<br>Number | Atomic<br>Type | Coordinates (Angstroms) |           |           |
|------------------|------------------|----------------|-------------------------|-----------|-----------|
|                  |                  |                | X                       | Y         | Z         |
| 1                | 6                | 0              | 0.798536                | 1.730156  | 0.199108  |
| 2                | 6                | 0              | 0.272029                | 0.538925  | -0.072397 |
| 3                | 1                | 0              | 1.850578                | 1.846628  | 0.429744  |
| 4                | 1                | 0              | 0.170560                | 2.613004  | 0.191538  |
| 5                | 7                | 0              | 1.054912                | -0.609489 | -0.051171 |
| 6                | 6                | 0              | 1.633022                | -1.636634 | -0.038025 |
| 7                | 6                | 0              | -1.173007               | 0.273395  | -0.434964 |
| 8                | 1                | 0              | -1.733425               | 1.206200  | -0.346027 |
| 9                | 1                | 0              | -1.216993               | -0.048877 | -1.486499 |
| 10               | 8                | 0              | -1.786344               | -0.659674 | 0.418399  |
| 11               | 1                | 0              | -1.347826               | -1.508194 | 0.299919  |

**1007**

Standard orientation:

| Center<br>Number | Atomic<br>Number | Atomic<br>Type | Coordinates (Angstroms) |           |           |
|------------------|------------------|----------------|-------------------------|-----------|-----------|
|                  |                  |                | X                       | Y         | Z         |
| 1                | 6                | 0              | -2.114292               | -0.455110 | -0.311603 |
| 2                | 6                | 0              | -0.959711               | -0.742926 | 0.272217  |
| 3                | 1                | 0              | -2.319259               | 0.539645  | -0.690656 |
| 4                | 1                | 0              | -2.881432               | -1.212781 | -0.428075 |
| 5                | 1                | 0              | -0.740549               | -1.736682 | 0.652440  |
| 6                | 6                | 0              | 0.141663                | 0.265824  | 0.478247  |

|    |   |   |           |           |           |
|----|---|---|-----------|-----------|-----------|
| 7  | 1 | 0 | 0.292438  | 0.420416  | 1.557527  |
| 8  | 8 | 0 | -0.174069 | 1.457269  | -0.164564 |
| 9  | 1 | 0 | 0.491807  | 2.113051  | 0.060786  |
| 10 | 7 | 0 | 1.385802  | -0.273805 | -0.011743 |
| 11 | 6 | 0 | 2.407163  | -0.711983 | -0.397747 |

**1008**

Standard orientation:

| Center<br>Number | Atomic<br>Number | Atomic<br>Type | Coordinates (Angstroms) |           |           |
|------------------|------------------|----------------|-------------------------|-----------|-----------|
|                  |                  |                | X                       | Y         | Z         |
| 1                | 6                | 0              | 0.932647                | 0.992608  | 0.000032  |
| 2                | 6                | 0              | -0.391383               | 0.847774  | -0.000276 |
| 3                | 1                | 0              | 1.424491                | 1.957798  | -0.000306 |
| 4                | 1                | 0              | -1.016672               | 1.734557  | -0.001080 |
| 5                | 6                | 0              | -1.099536               | -0.473302 | 0.000224  |
| 6                | 1                | 0              | -0.786696               | -1.053489 | -0.882787 |
| 7                | 1                | 0              | -0.786936               | -1.052741 | 0.883814  |
| 8                | 8                | 0              | -2.486603               | -0.218449 | -0.000071 |
| 9                | 1                | 0              | -2.947322               | -1.060439 | -0.000229 |
| 10               | 7                | 0              | 1.779111                | -0.100861 | 0.000864  |
| 11               | 6                | 0              | 2.483636                | -1.045758 | -0.000795 |

**1009**

Standard orientation:

| Center | Atomic | Atomic | Coordinates (Angstroms) |   |   |
|--------|--------|--------|-------------------------|---|---|
| Number | Number | Type   | X                       | Y | Z |

| Number | Number | Type | X         | Y         | Z         |
|--------|--------|------|-----------|-----------|-----------|
| 1      | 6      | 0    | -0.841284 | 0.567864  | 0.000002  |
| 2      | 6      | 0    | 0.283004  | -0.144638 | -0.000007 |
| 3      | 1      | 0    | -0.852925 | 1.654110  | 0.000032  |
| 4      | 1      | 0    | 0.241834  | -1.229929 | -0.000037 |
| 5      | 7      | 0    | -2.092260 | -0.016756 | -0.000027 |
| 6      | 6      | 0    | -3.176586 | -0.477813 | -0.000051 |
| 7      | 6      | 0    | 1.657106  | 0.464852  | 0.000022  |
| 8      | 1      | 0    | 1.777376  | 1.107947  | -0.886144 |
| 9      | 1      | 0    | 1.777342  | 1.107942  | 0.886195  |
| 10     | 8      | 0    | 2.587116  | -0.595192 | 0.000037  |
| 11     | 1      | 0    | 3.471823  | -0.222835 | 0.000053  |

# 1100

Standard orientation:

| Center<br>Number | Atomic<br>Number | Atomic<br>Type | Coordinates (Angstroms) |           |           |
|------------------|------------------|----------------|-------------------------|-----------|-----------|
|                  |                  |                | X                       | Y         | Z         |
| 1                | 6                | 0              | 0.064713                | 1.272442  | 0.015189  |
| 2                | 6                | 0              | -1.419830               | 0.948918  | -0.071505 |
| 3                | 6                | 0              | -0.179041               | -1.176581 | -0.063588 |
| 4                | 1                | 0              | 0.375617                | 1.919562  | -0.842989 |
| 5                | 1                | 0              | 0.285801                | 1.841757  | 0.952947  |
| 6                | 1                | 0              | -0.040988               | -1.873777 | 0.800480  |
| 7                | 1                | 0              | -0.033885               | -1.776540 | -0.997061 |
| 8                | 7                | 0              | -1.572451               | -0.564896 | -0.037793 |
| 9                | 1                | 0              | -2.049227               | -0.838923 | 0.797427  |
| 10               | 6                | 0              | 0.833009                | -0.041484 | -0.001146 |

11 8 0 2.084592 -0.167197 0.035007

# 1101

Standard orientation:

| Center<br>Number | Atomic<br>Number | Atomic<br>Type | Coordinates (Angstroms) |           |           |
|------------------|------------------|----------------|-------------------------|-----------|-----------|
|                  |                  |                | X                       | Y         | Z         |
| 1                | 6                | 0              | 1.719845                | -0.392737 | 0.078555  |
| 2                | 8                | 0              | 2.911213                | -0.249616 | -0.116572 |
| 3                | 1                | 0              | 1.294012                | -1.364592 | 0.414770  |
| 4                | 6                | 0              | 0.732499                | 0.654130  | -0.095276 |
| 5                | 1                | 0              | 1.009675                | 1.658832  | -0.389608 |
| 6                | 7                | 0              | -0.523184               | 0.387641  | 0.121248  |
| 7                | 6                | 0              | -1.646401               | 0.147856  | 0.449311  |
| 8                | 6                | 0              | -2.865029               | -0.344849 | -0.232179 |
| 9                | 1                | 0              | -3.229646               | -1.233614 | 0.287911  |
| 10               | 1                | 0              | -3.646461               | 0.413874  | -0.142277 |
| 11               | 1                | 0              | -2.700487               | -0.577464 | -1.289426 |

# 1102

Standard orientation:

| Center<br>Number | Atomic<br>Number | Atomic<br>Type | Coordinates (Angstroms) |          |          |
|------------------|------------------|----------------|-------------------------|----------|----------|
|                  |                  |                | X                       | Y        | Z        |
| 1                | 6                | 0              | 1.465917                | 0.628438 | 0.000032 |
| 2                | 6                | 0              | 0.061049                | 1.131428 | 0.000090 |

|    |   |   |           |           |           |
|----|---|---|-----------|-----------|-----------|
| 3  | 6 | 0 | -0.752455 | 0.059017  | -0.000241 |
| 4  | 6 | 0 | -0.013166 | -1.230155 | 0.000145  |
| 5  | 1 | 0 | 2.037868  | 0.927011  | -0.887516 |
| 6  | 1 | 0 | 2.038476  | 0.927121  | 0.887162  |
| 7  | 1 | 0 | -0.208392 | 2.178127  | 0.000271  |
| 8  | 7 | 0 | 1.241836  | -0.819811 | -0.000085 |
| 9  | 1 | 0 | 2.017720  | -1.465109 | 0.000178  |
| 10 | 8 | 0 | -2.098137 | 0.063037  | 0.000018  |
| 11 | 1 | 0 | -2.361502 | -0.865132 | 0.000198  |

### 1103

Standard orientation:

| Center<br>Number | Atomic<br>Number | Atomic<br>Type | Coordinates (Angstroms) |           |           |
|------------------|------------------|----------------|-------------------------|-----------|-----------|
|                  |                  |                | X                       | Y         | Z         |
| 1                | 6                | 0              | 1.460920                | 0.912153  | -0.000071 |
| 2                | 6                | 0              | 0.011275                | 1.190797  | 0.000095  |
| 3                | 6                | 0              | -0.702288               | 0.045792  | -0.000021 |
| 4                | 6                | 0              | 0.228229                | -1.125862 | 0.000099  |
| 5                | 7                | 0              | 1.503020                | -0.424444 | -0.000031 |
| 6                | 1                | 0              | 2.373352                | -0.932414 | -0.000497 |
| 7                | 1                | 0              | -0.404074               | 2.192215  | 0.000106  |
| 8                | 1                | 0              | 0.095990                | -1.753146 | -0.888658 |
| 9                | 8                | 0              | -2.022484               | -0.195715 | -0.000147 |
| 10               | 1                | 0              | -2.491385               | 0.645049  | 0.000226  |
| 11               | 1                | 0              | 0.096032                | -1.752161 | 0.889602  |

### 1104

Standard orientation:

| Center<br>Number | Atomic<br>Number | Atomic<br>Type | Coordinates (Angstroms) |           |           |
|------------------|------------------|----------------|-------------------------|-----------|-----------|
|                  |                  |                | X                       | Y         | Z         |
| 1                | 6                | 0              | 1.953653                | -0.233209 | 0.144131  |
| 2                | 8                | 0              | 2.463576                | 0.865448  | 0.075619  |
| 3                | 1                | 0              | 2.452693                | -1.094164 | 0.636988  |
| 4                | 6                | 0              | 0.713638                | -0.607580 | -0.520679 |
| 5                | 7                | 0              | -0.429198               | -0.549648 | -0.094531 |
| 6                | 6                | 0              | -1.654393               | -0.492226 | 0.235803  |
| 7                | 1                | 0              | -2.077618               | -1.364043 | 0.727058  |
| 8                | 6                | 0              | -2.498710               | 0.717149  | -0.029338 |
| 9                | 1                | 0              | -3.366620               | 0.452359  | -0.642420 |
| 10               | 1                | 0              | -2.875534               | 1.142068  | 0.906909  |
| 11               | 1                | 0              | -1.922264               | 1.482930  | -0.551280 |

### 1105

Standard orientation:

| Center<br>Number | Atomic<br>Number | Atomic<br>Type | Coordinates (Angstroms) |           |           |
|------------------|------------------|----------------|-------------------------|-----------|-----------|
|                  |                  |                | X                       | Y         | Z         |
| 1                | 6                | 0              | -1.387537               | 0.959964  | -0.000049 |
| 2                | 6                | 0              | -1.537532               | -0.556947 | 0.000079  |
| 3                | 6                | 0              | -0.154944               | -1.154653 | -0.000015 |
| 4                | 6                | 0              | 0.683433                | -0.115068 | 0.000042  |
| 5                | 1                | 0              | -2.139138               | -0.841717 | -0.873552 |
| 6                | 1                | 0              | -2.139207               | -0.841555 | 0.873683  |

|    |   |   |           |           |           |
|----|---|---|-----------|-----------|-----------|
| 7  | 1 | 0 | 0.104847  | -2.203190 | -0.000360 |
| 8  | 8 | 0 | 2.020445  | 0.036385  | 0.000087  |
| 9  | 1 | 0 | 2.432571  | -0.831938 | -0.000348 |
| 10 | 7 | 0 | -0.064517 | 1.091645  | -0.000038 |
| 11 | 1 | 0 | 0.408457  | 1.986028  | -0.000189 |

### 1106

Standard orientation:

| Center<br>Number | Atomic<br>Number | Atomic<br>Type | Coordinates (Angstroms) |           |           |
|------------------|------------------|----------------|-------------------------|-----------|-----------|
|                  |                  |                | X                       | Y         | Z         |
| 1                | 6                | 0              | 0.070297                | 0.334630  | -0.000209 |
| 2                | 8                | 0              | 0.366639                | 1.541488  | -0.000023 |
| 3                | 6                | 0              | 1.085944                | -0.766814 | -0.000308 |
| 4                | 6                | 0              | 2.382043                | -0.473477 | 0.000383  |
| 5                | 1                | 0              | 0.728977                | -1.795836 | -0.000921 |
| 6                | 1                | 0              | 3.145548                | -1.243547 | 0.000394  |
| 7                | 1                | 0              | 2.689804                | 0.567750  | 0.001001  |
| 8                | 6                | 0              | -1.237513               | -0.094701 | -0.000739 |
| 9                | 7                | 0              | -2.469083               | -0.401634 | 0.000445  |
| 10               | 1                | 0              | -3.009915               | -0.523581 | -0.856827 |
| 11               | 1                | 0              | -3.008571               | -0.523080 | 0.858662  |

### 1200

Standard orientation:

| Center<br>Number | Atomic<br>Number | Atomic<br>Type | Coordinates (Angstroms) |           |           |
|------------------|------------------|----------------|-------------------------|-----------|-----------|
|                  |                  |                | X                       | Y         | Z         |
| 1                | 6                | 0              | 1.472866                | -0.609498 | 0.000145  |
| 2                | 6                | 0              | 1.396886                | 0.732879  | 0.000030  |
| 3                | 6                | 0              | 0.006480                | 1.139405  | -0.000028 |
| 4                | 1                | 0              | 2.362798                | -1.222194 | -0.000409 |
| 5                | 1                | 0              | 2.224262                | 1.429924  | -0.000375 |
| 6                | 1                | 0              | -0.430554               | 2.125929  | 0.000465  |
| 7                | 6                | 0              | 0.080133                | -1.148635 | 0.000049  |
| 8                | 1                | 0              | -0.182848               | -1.730533 | -0.887289 |
| 9                | 1                | 0              | -0.183385               | -1.730141 | 0.887466  |
| 10               | 7                | 0              | -0.767135               | 0.072256  | -0.000129 |
| 11               | 8                | 0              | -2.019816               | -0.007960 | -0.000016 |

### 1201

Standard orientation:

| Center<br>Number | Atomic<br>Number | Atomic<br>Type | Coordinates (Angstroms) |           |           |
|------------------|------------------|----------------|-------------------------|-----------|-----------|
|                  |                  |                | X                       | Y         | Z         |
| 1                | 6                | 0              | 1.312000                | 0.819740  | -0.000316 |
| 2                | 6                | 0              | 0.022377                | 1.141230  | 0.000002  |
| 3                | 6                | 0              | 0.005656                | -1.111665 | -0.000295 |
| 4                | 1                | 0              | 2.147547                | 1.505240  | -0.000636 |
| 5                | 1                | 0              | -0.505429               | 2.082653  | 0.000480  |

|    |   |   |           |           |           |
|----|---|---|-----------|-----------|-----------|
| 6  | 1 | 0 | -0.410427 | -2.106316 | -0.000432 |
| 7  | 6 | 0 | 1.431297  | -0.679420 | 0.000210  |
| 8  | 1 | 0 | 1.980409  | -1.040176 | -0.879282 |
| 9  | 1 | 0 | 1.978704  | -1.037634 | 0.881993  |
| 10 | 7 | 0 | -0.784661 | -0.060104 | -0.000136 |
| 11 | 8 | 0 | -2.040770 | -0.000294 | 0.000153  |

### 1300

Standard orientation:

| Center<br>Number | Atomic<br>Number | Atomic<br>Type | Coordinates (Angstroms) |           |           |
|------------------|------------------|----------------|-------------------------|-----------|-----------|
|                  |                  |                | X                       | Y         | Z         |
| 1                | 6                | 0              | 2.482800                | -1.155266 | 0.000001  |
| 2                | 6                | 0              | 1.292037                | -0.554672 | 0.000017  |
| 3                | 1                | 0              | 2.581827                | -2.235149 | 0.000022  |
| 4                | 1                | 0              | 3.404069                | -0.576976 | -0.000035 |
| 5                | 1                | 0              | 0.361591                | -1.115525 | 0.000053  |
| 6                | 6                | 0              | 1.204143                | 0.913601  | -0.000014 |
| 7                | 1                | 0              | 2.177044                | 1.445591  | 0.000007  |
| 8                | 8                | 0              | 0.164355                | 1.542999  | -0.000004 |
| 9                | 1                | 0              | -1.611433               | 0.638443  | 0.000014  |
| 10               | 6                | 0              | -2.457517               | -0.036679 | 0.000002  |
| 11               | 7                | 0              | -3.336674               | -0.786040 | -0.000010 |

### 1301

Standard orientation:

| Center<br>Number | Atomic<br>Number | Atomic<br>Type | Coordinates (Angstroms) |           |           |
|------------------|------------------|----------------|-------------------------|-----------|-----------|
|                  |                  |                | X                       | Y         | Z         |
| 1                | 6                | 0              | 2.409629                | -1.089566 | -0.000009 |
| 2                | 6                | 0              | 1.196060                | -0.535300 | -0.000027 |
| 3                | 1                | 0              | 2.548641                | -2.165015 | -0.000023 |
| 4                | 1                | 0              | 3.308771                | -0.477470 | 0.000031  |
| 5                | 1                | 0              | 0.285859                | -1.128309 | -0.000064 |
| 6                | 6                | 0              | 1.059168                | 0.926661  | 0.000022  |
| 7                | 1                | 0              | 2.008813                | 1.496098  | 0.000013  |
| 8                | 8                | 0              | -0.002304               | 1.524585  | -0.000038 |
| 9                | 1                | 0              | -1.525319               | 0.586146  | -0.000107 |
| 10               | 6                | 0              | -3.107127               | -0.934096 | 0.000103  |
| 11               | 7                | 0              | -2.279245               | -0.102047 | -0.000010 |
